# Supplementary material for: The use of symmetry in enantioselective synthesis: Four pairs of chrysene enantiomers prepared from 19-nortestosterone
Source: Royal Society of Chemistry journal article supplement (doi:10.1039/c1ob05385j), 2011-01-01

# **The Use of Symmetry in Enantioselective Synthesis: Four Pairs of Chrysene Enantiomers Prepared From 19-Nortestosterone**

**Eva Stastna, Nigam P. Rath and Douglas F. Covey**

## Supportive Information

### Table of Contents

|                                                               |       |
|---------------------------------------------------------------|-------|
| <sup>1</sup> H NMR spectra (CDCl <sub>3</sub> , 300 MHz)..... | 2-47  |
| <sup>13</sup> C NMR spectra (CDCl <sub>3</sub> , 75 MHz)..... | 47-93 |

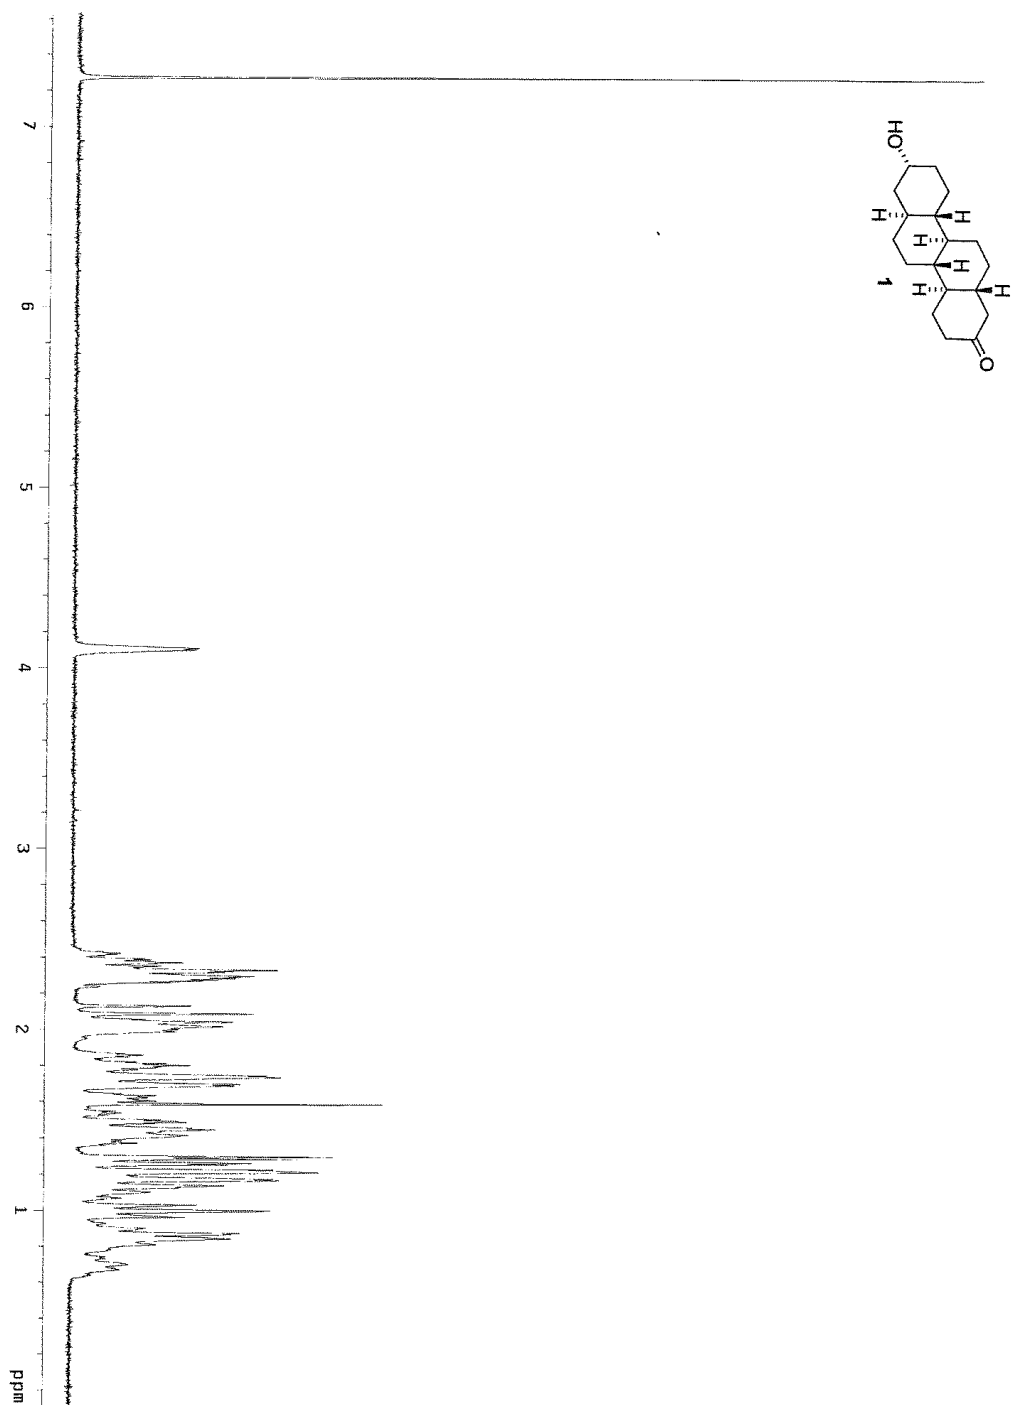

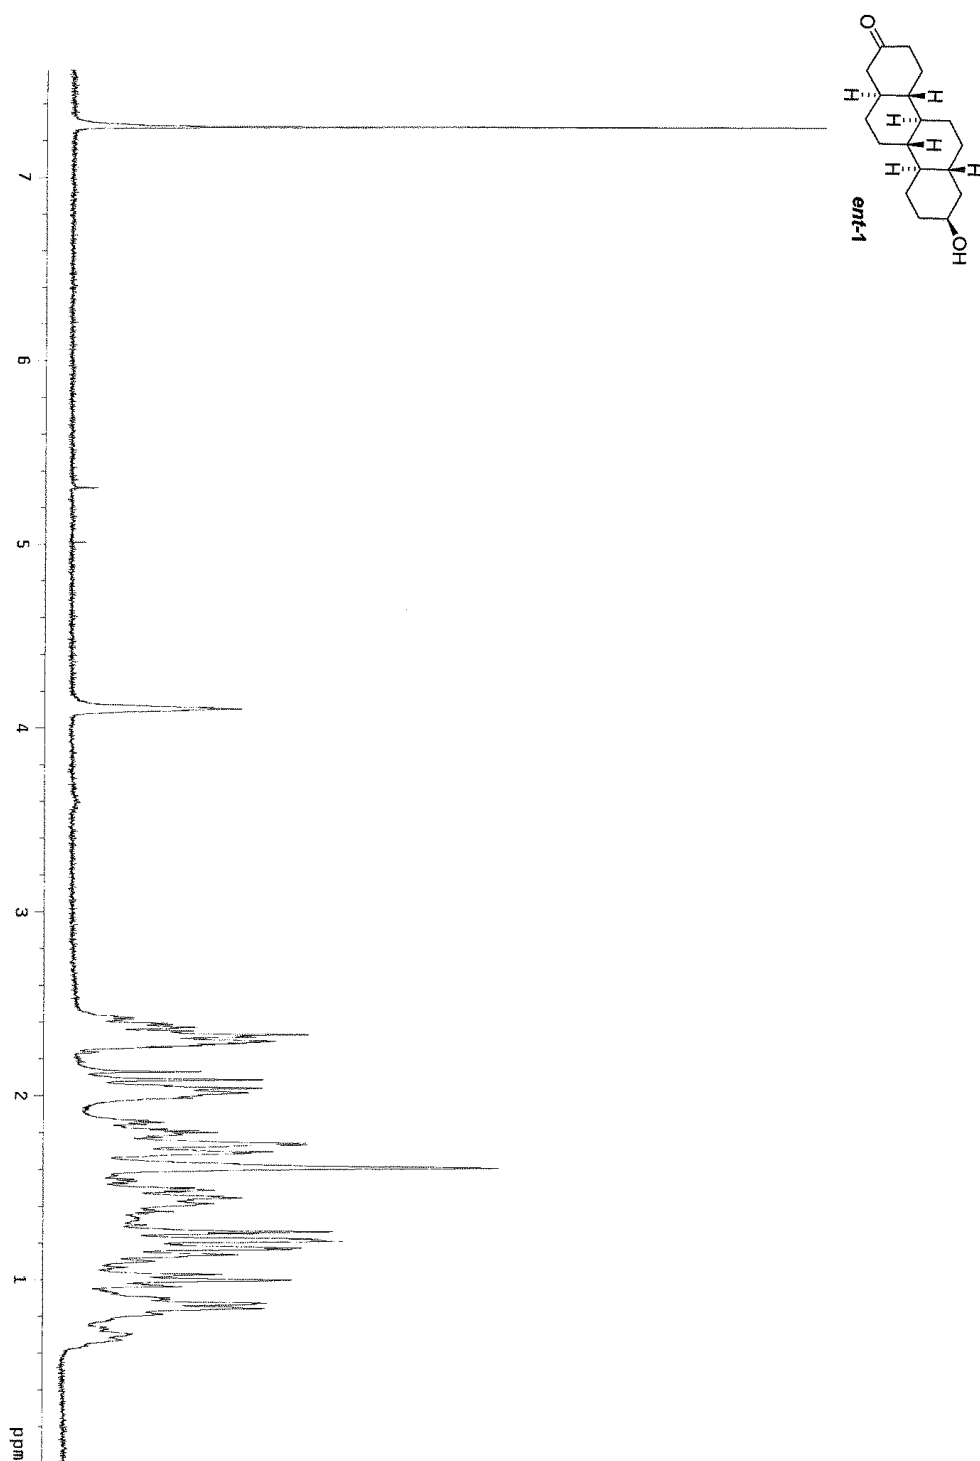

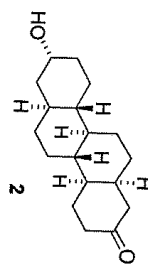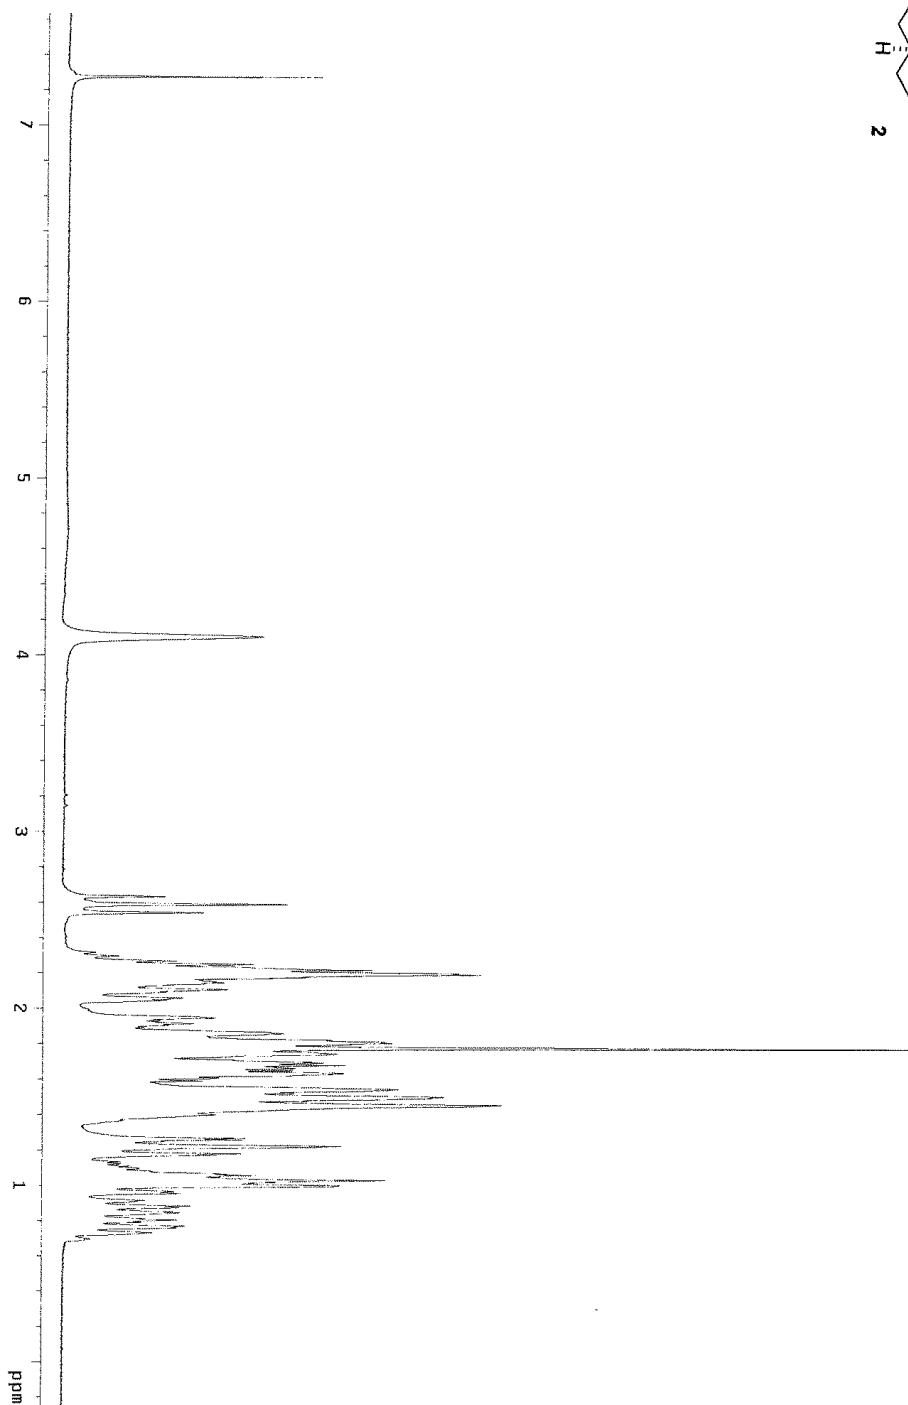

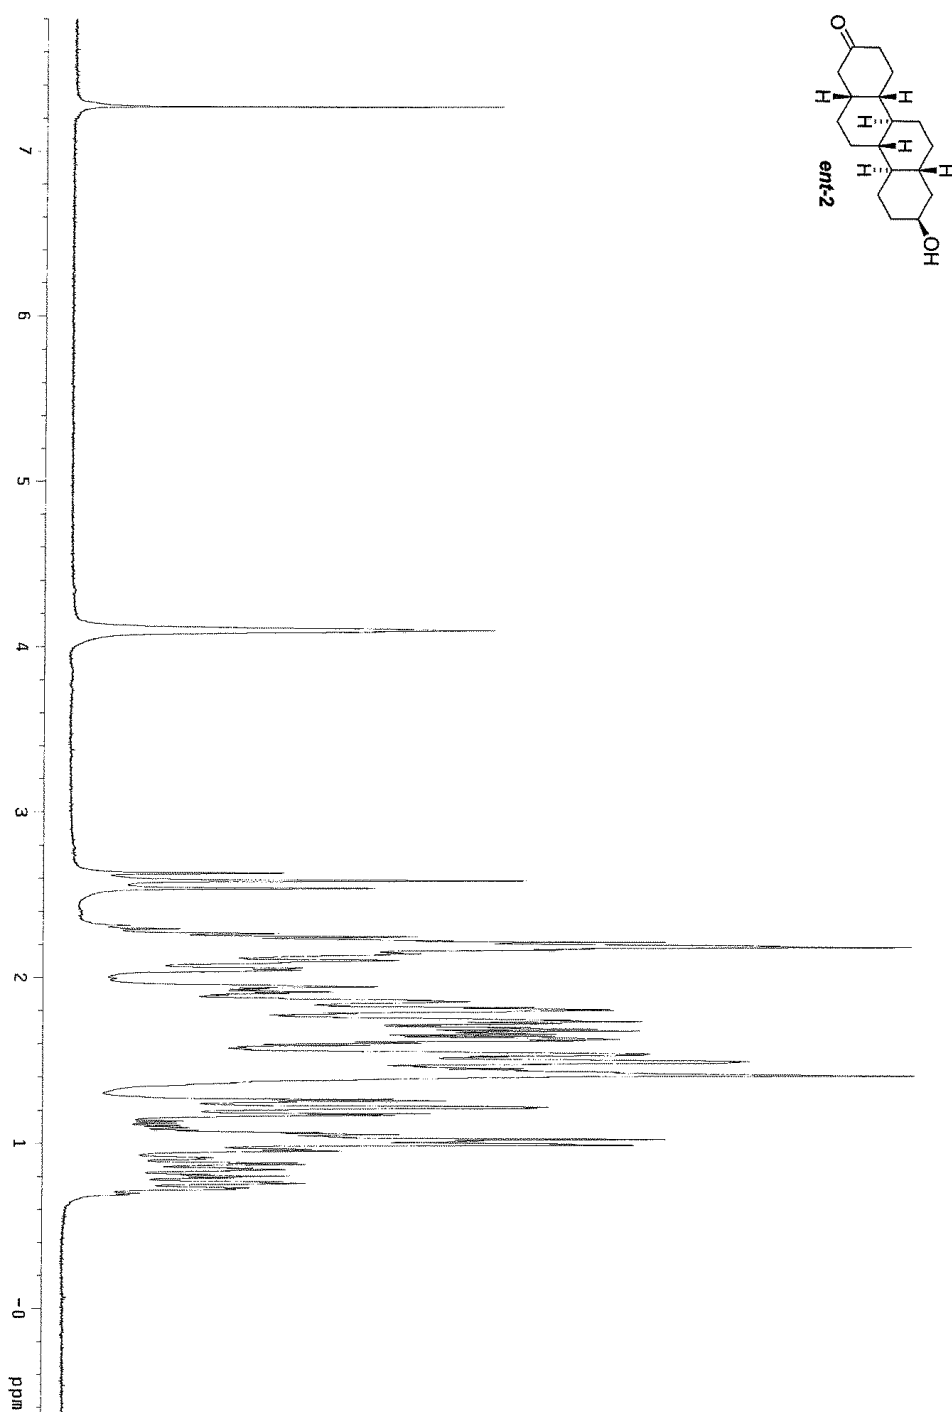

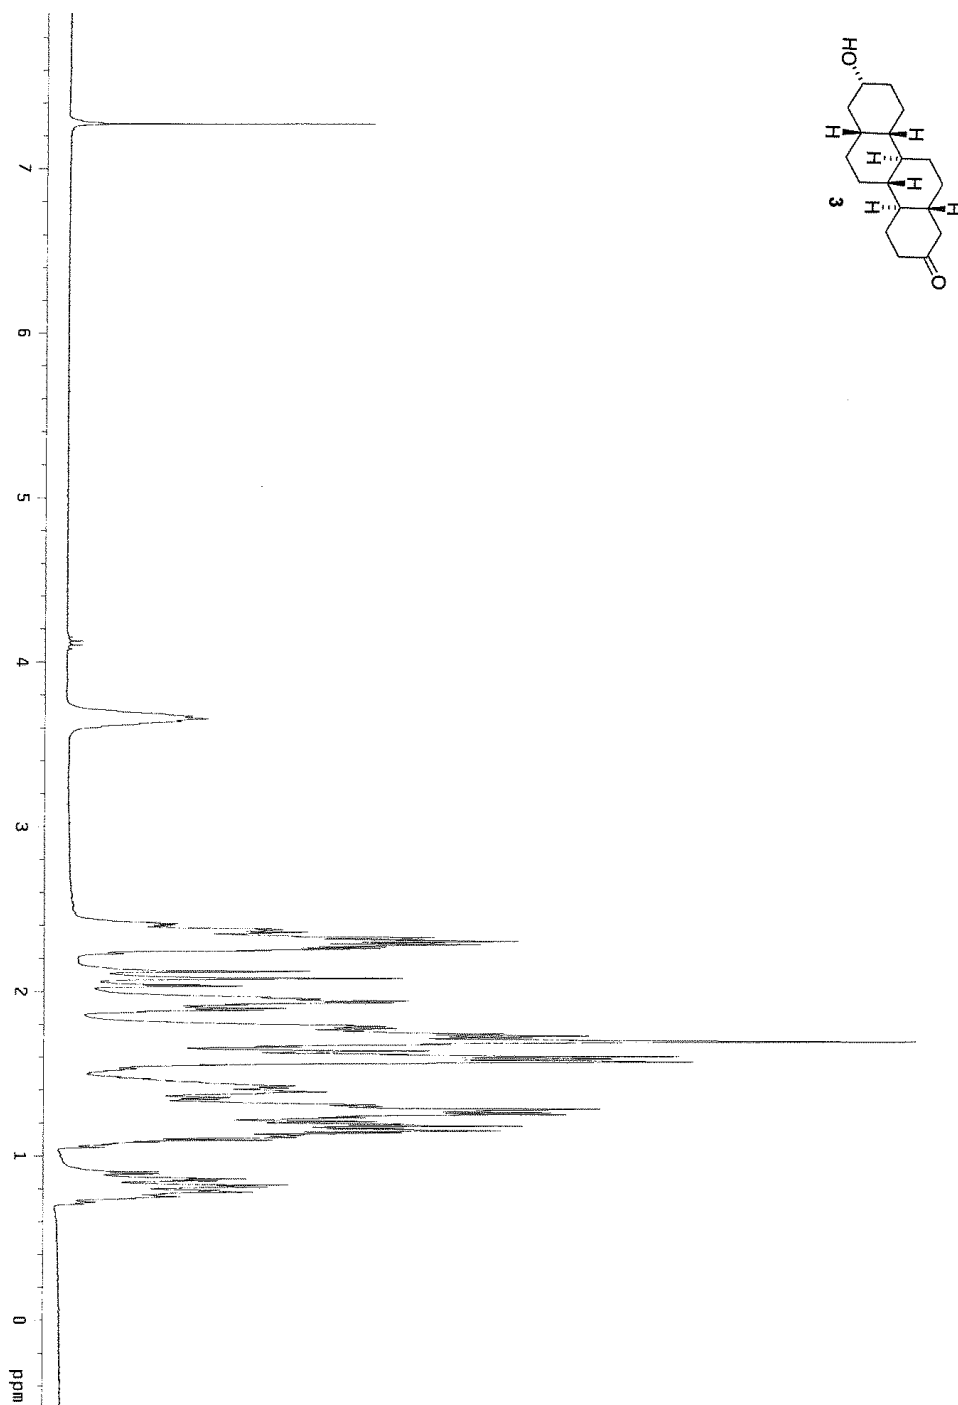

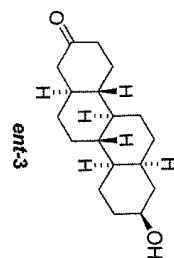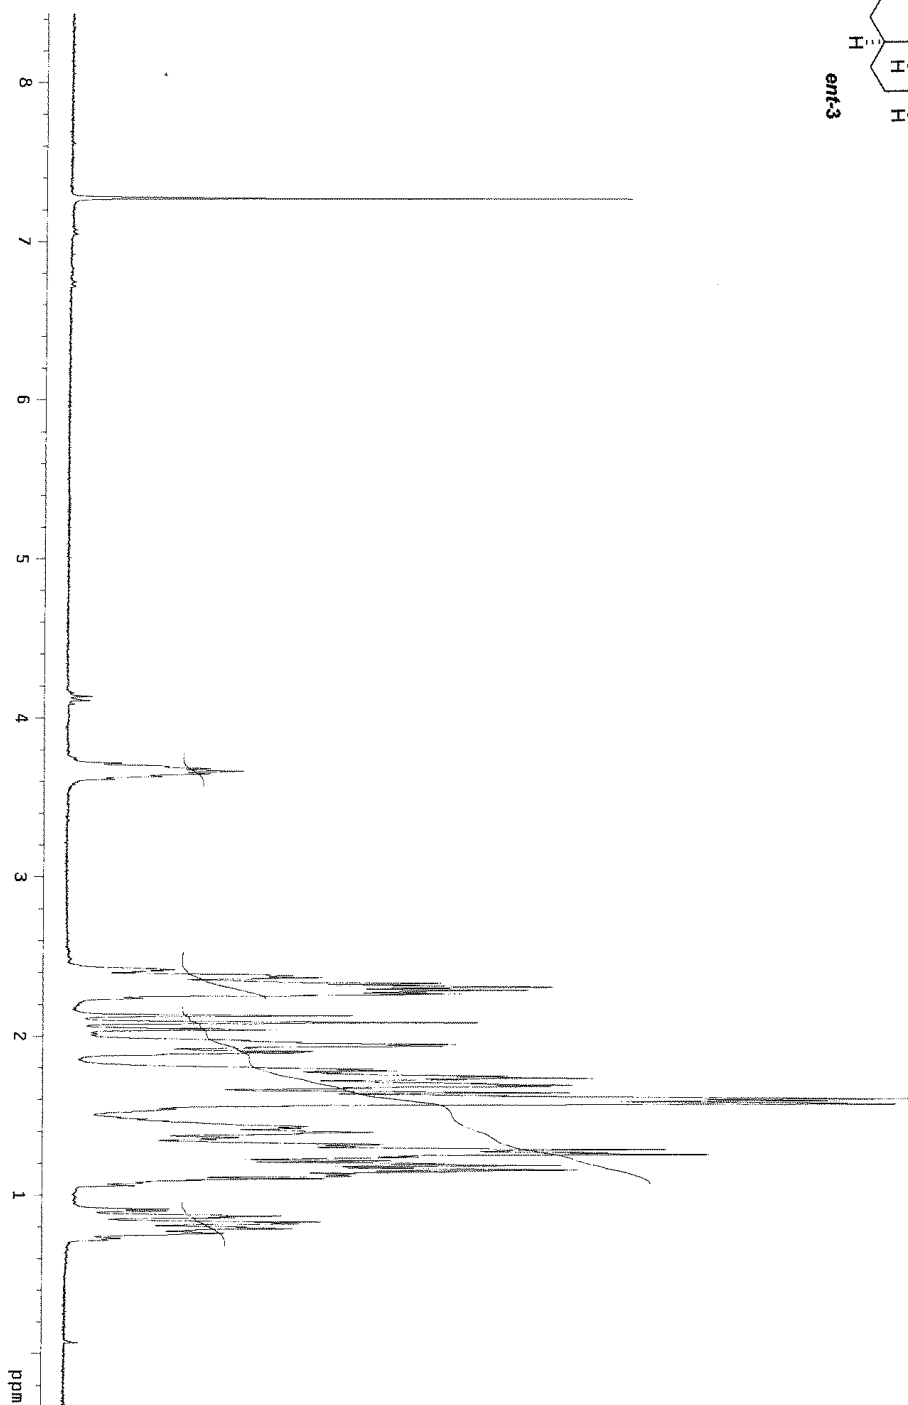

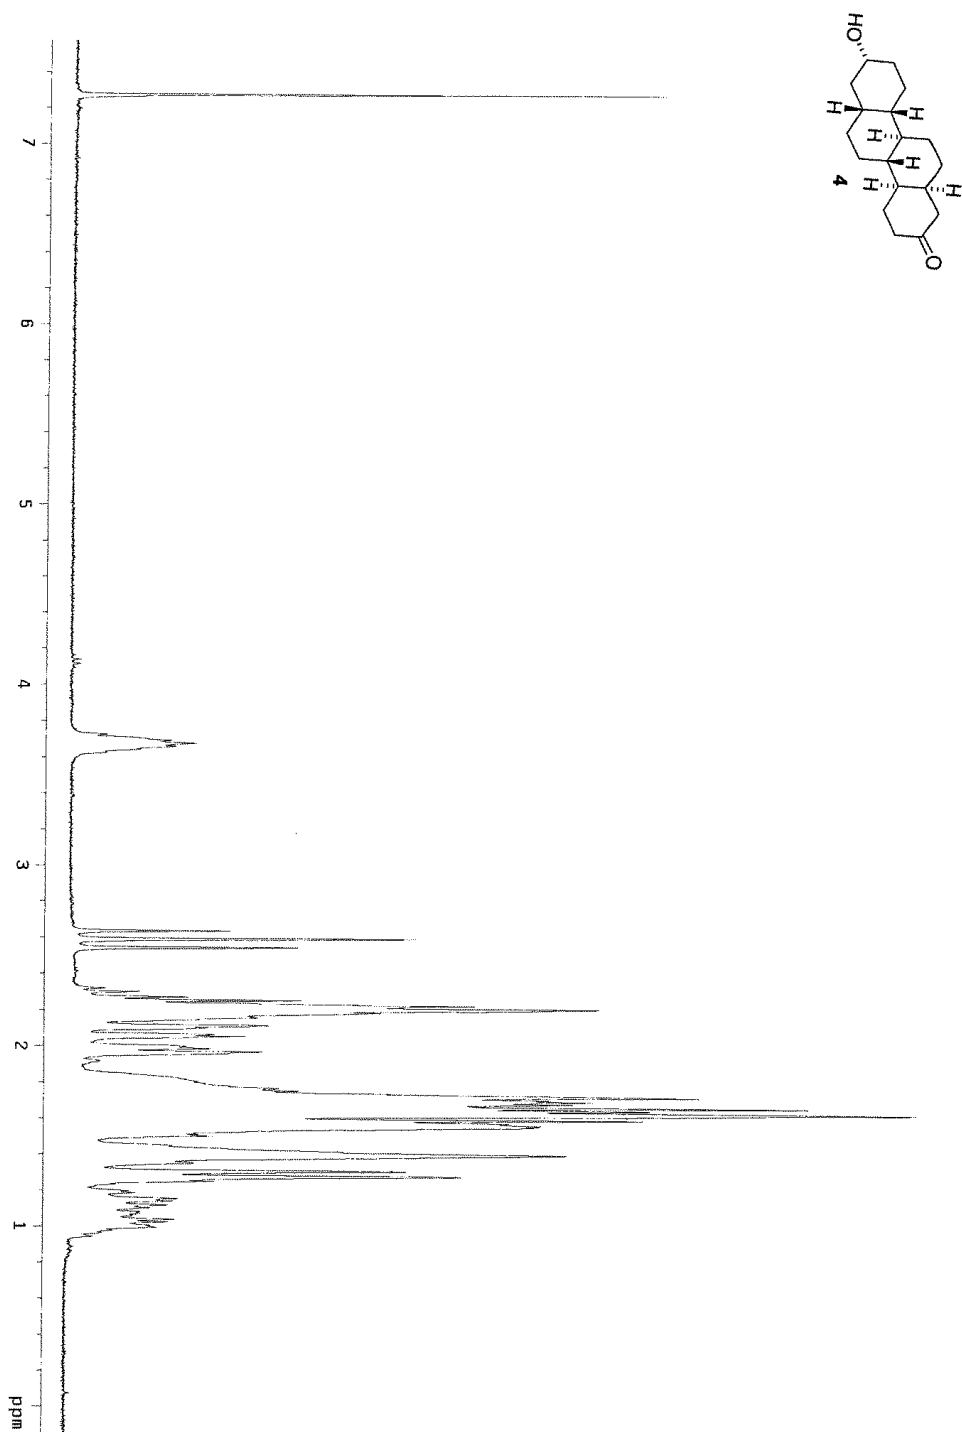



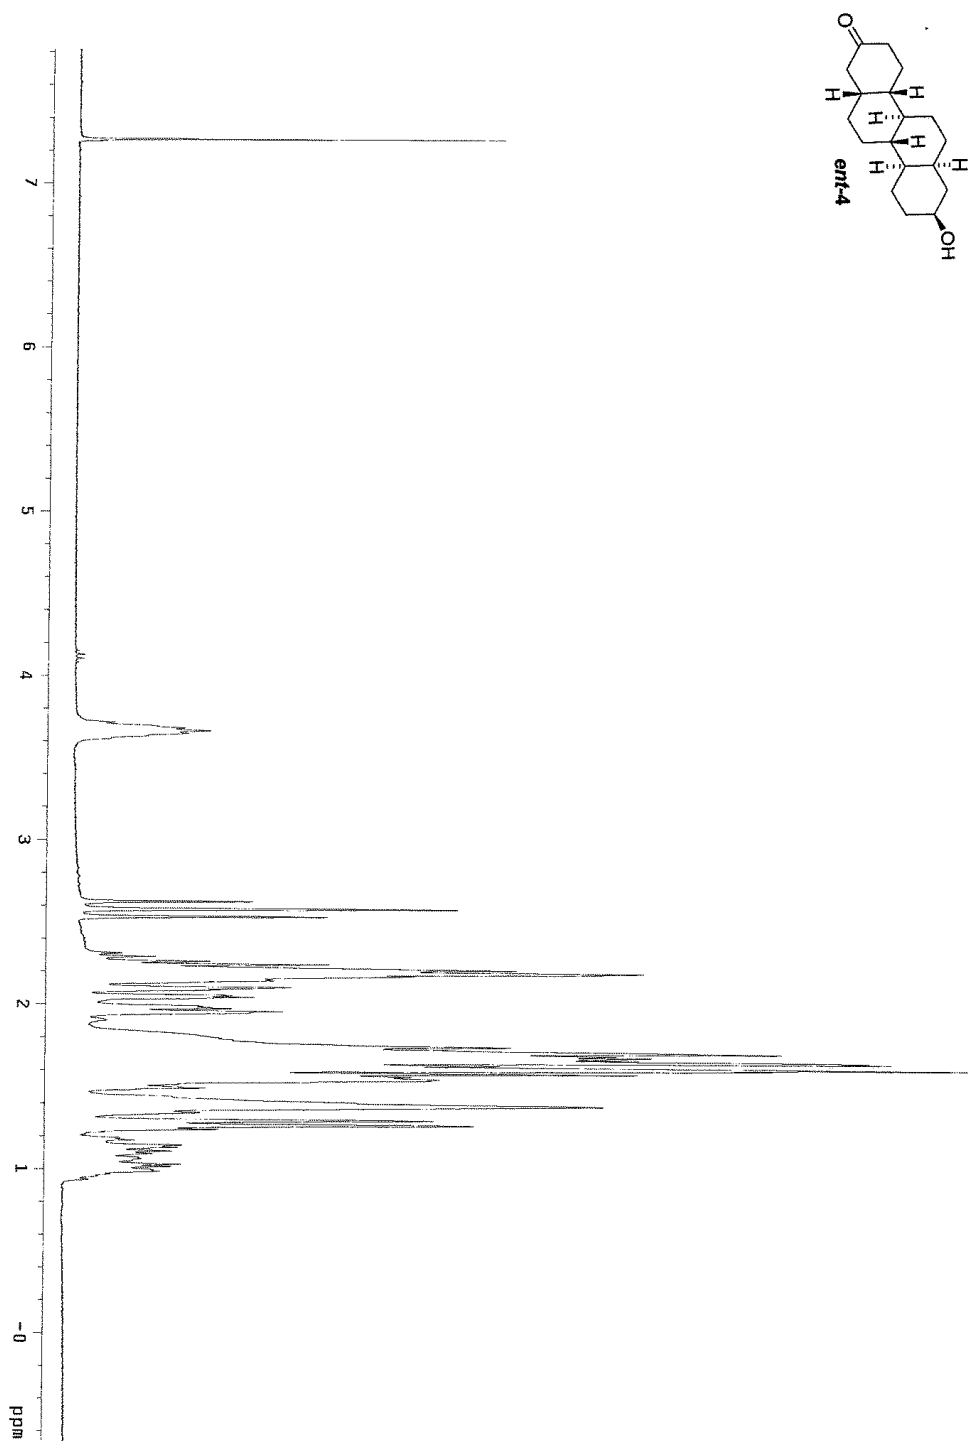

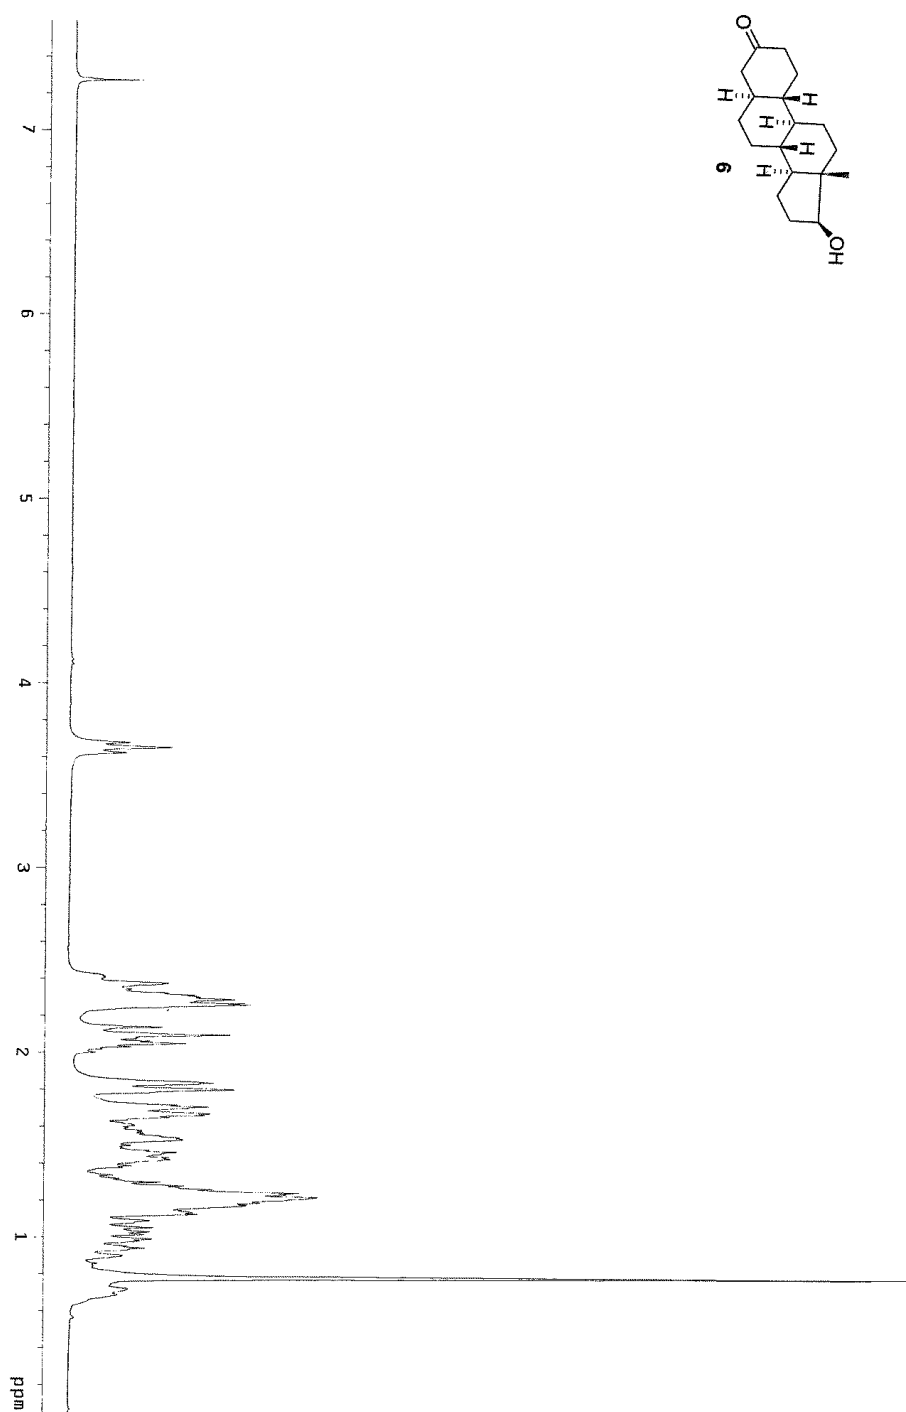

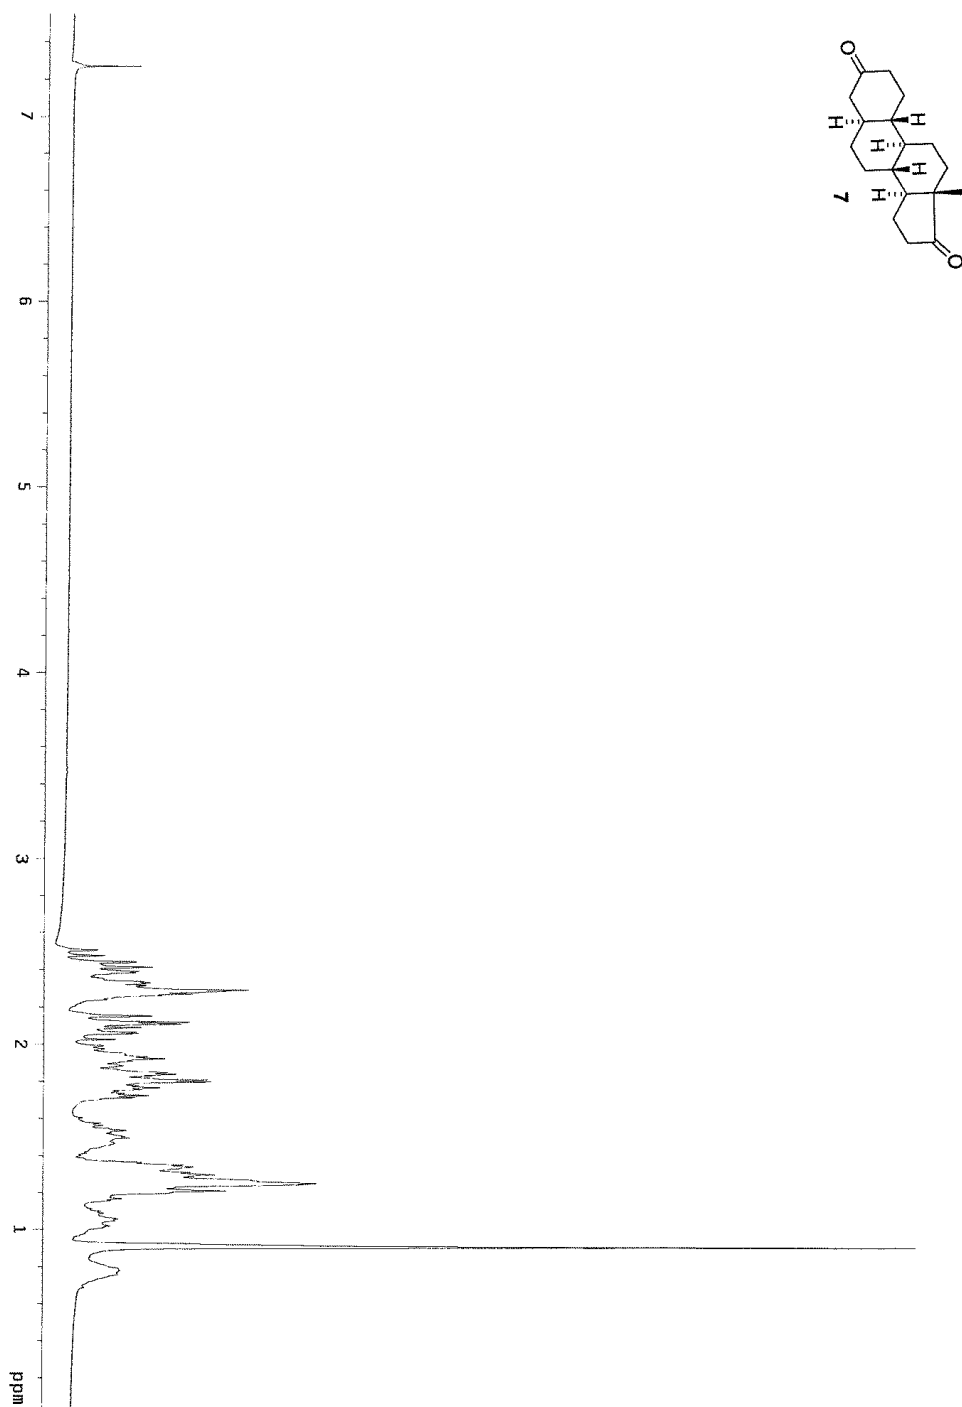

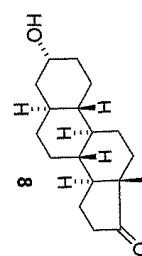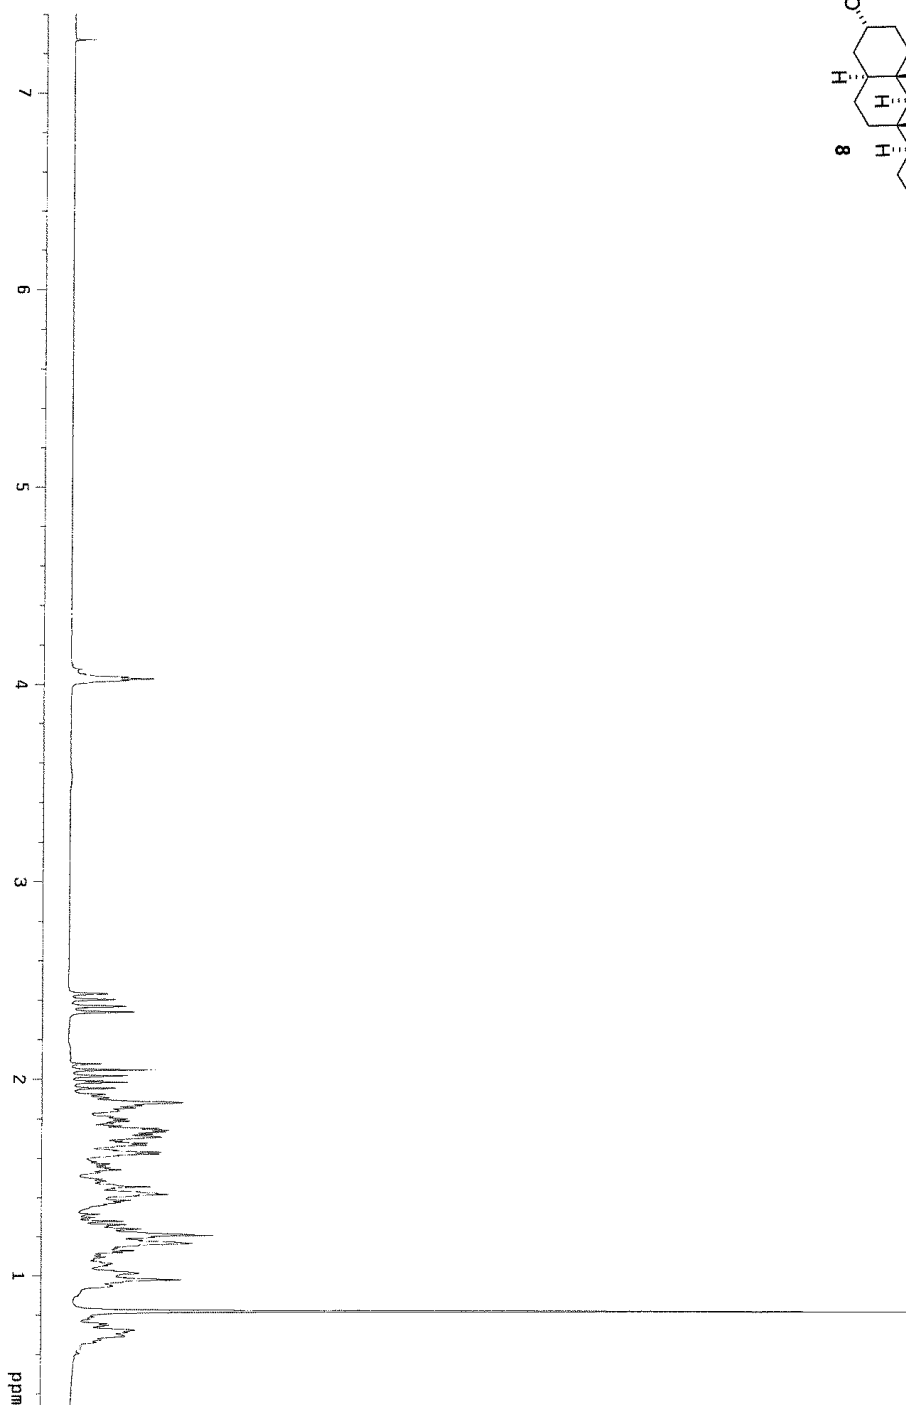

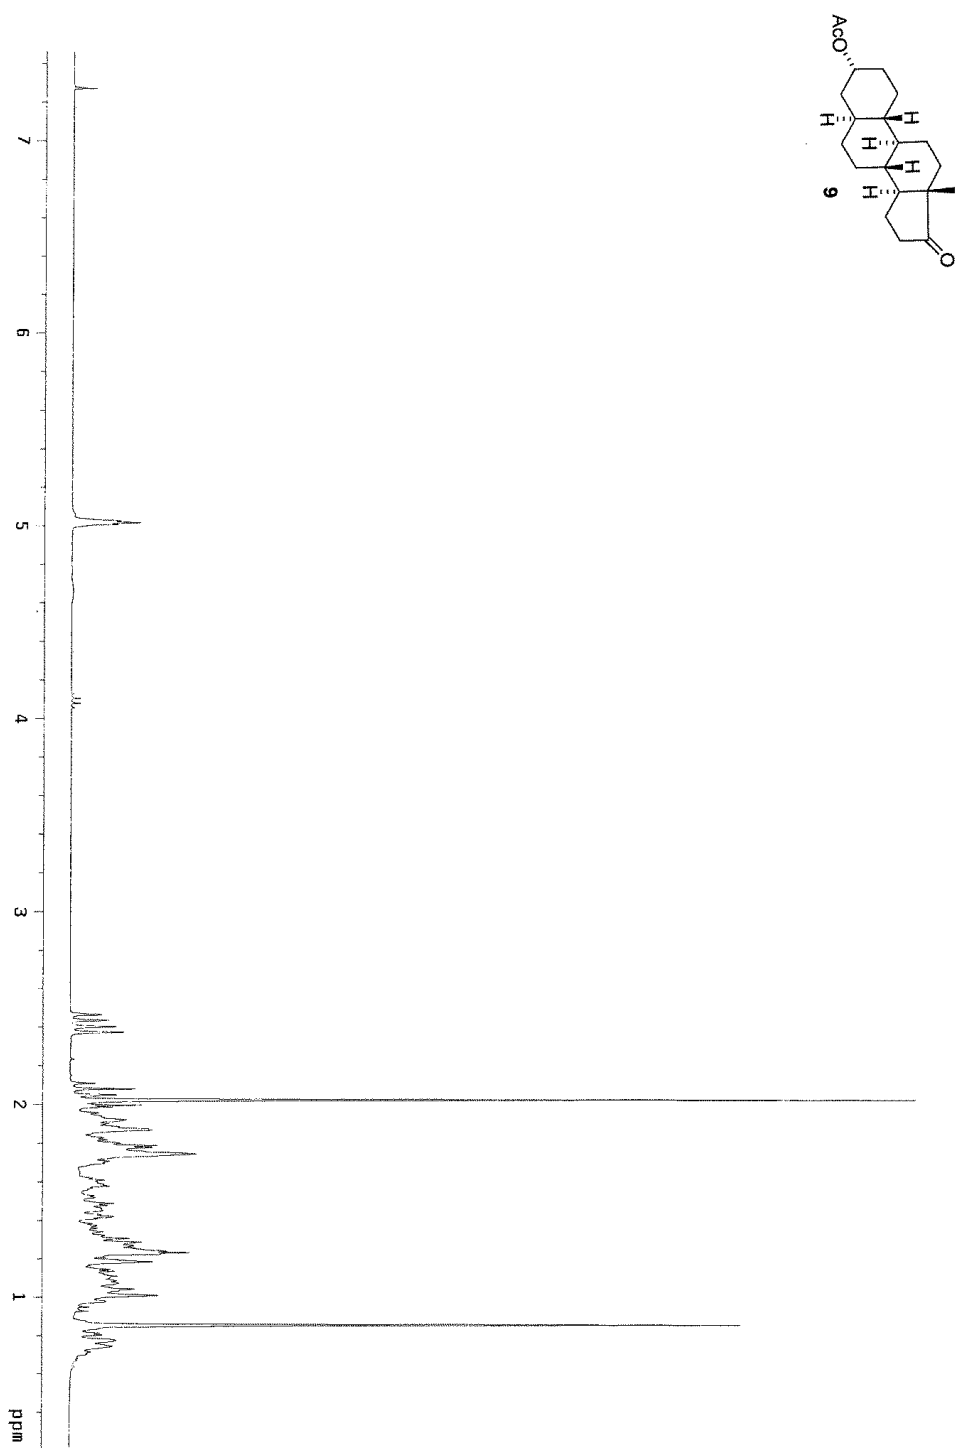

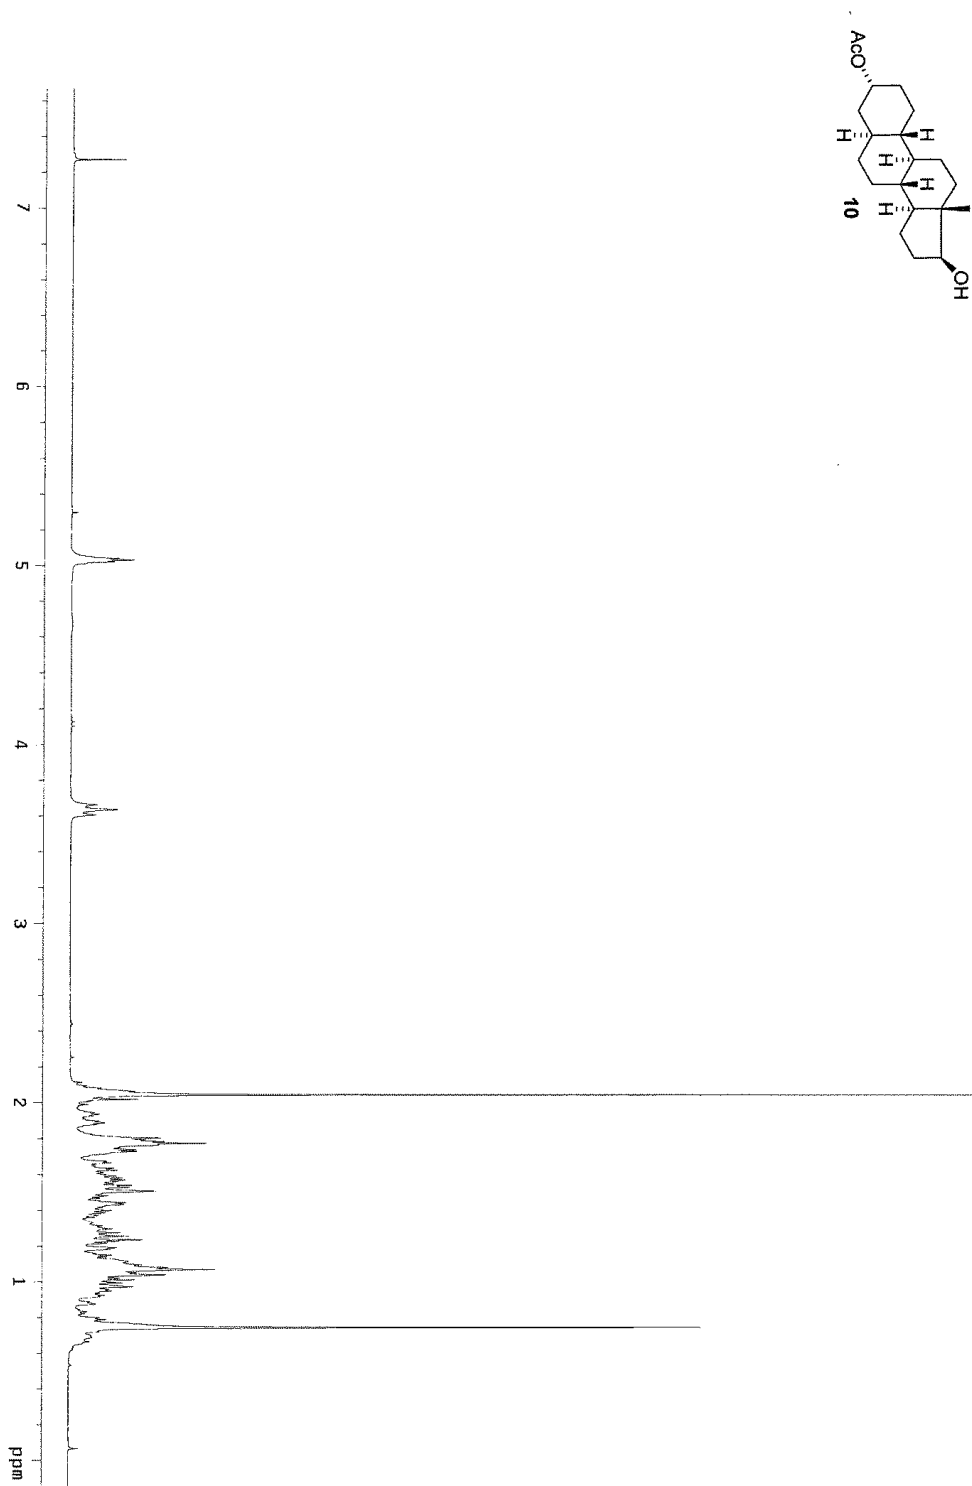

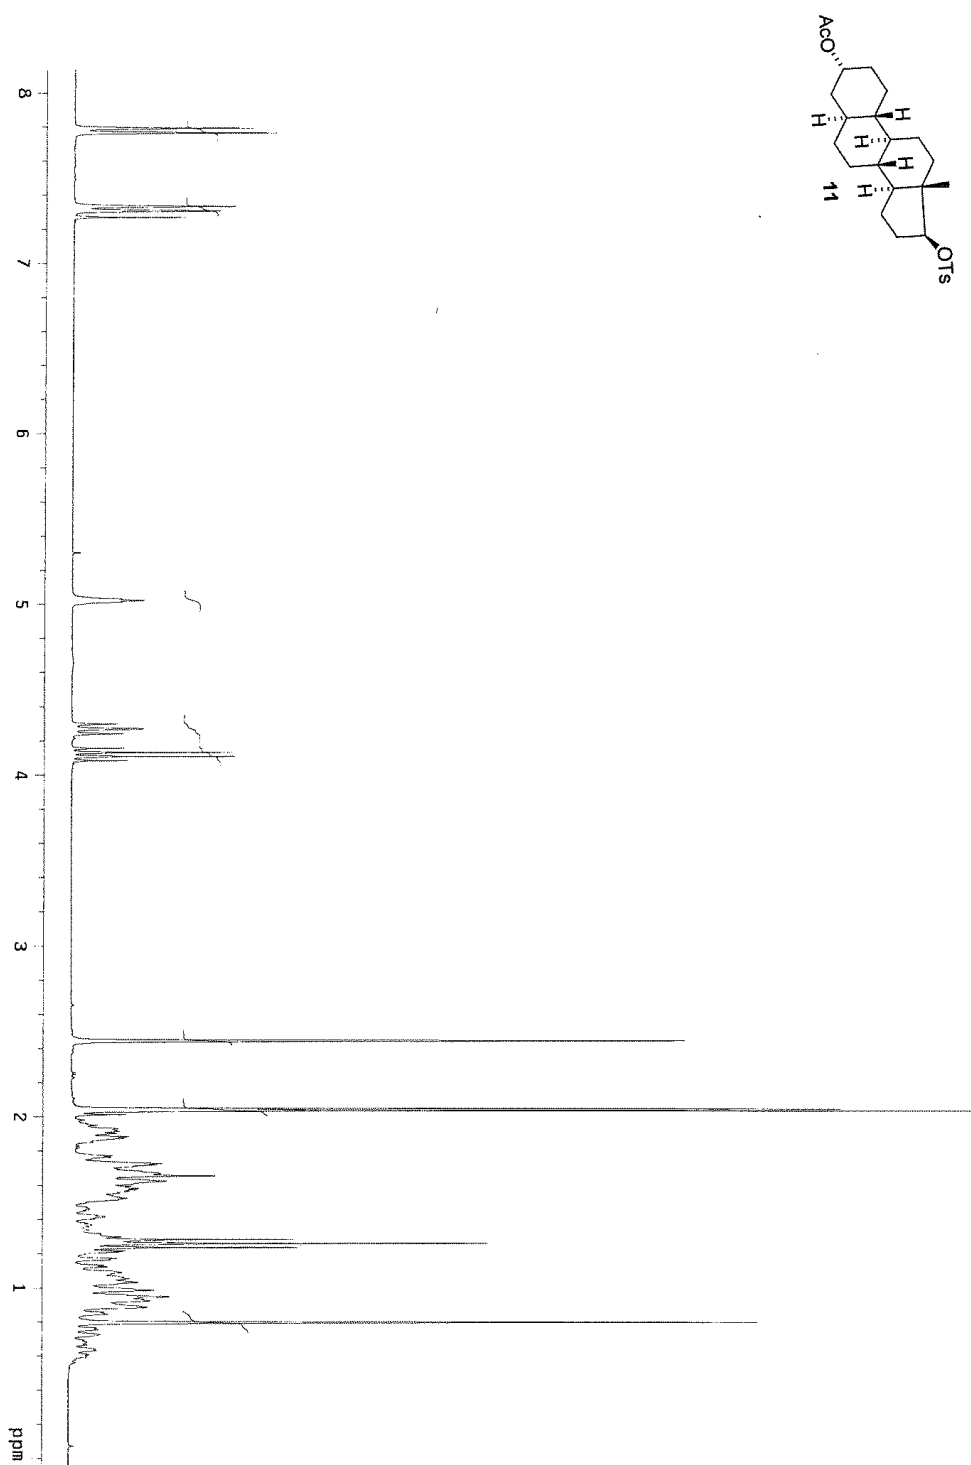

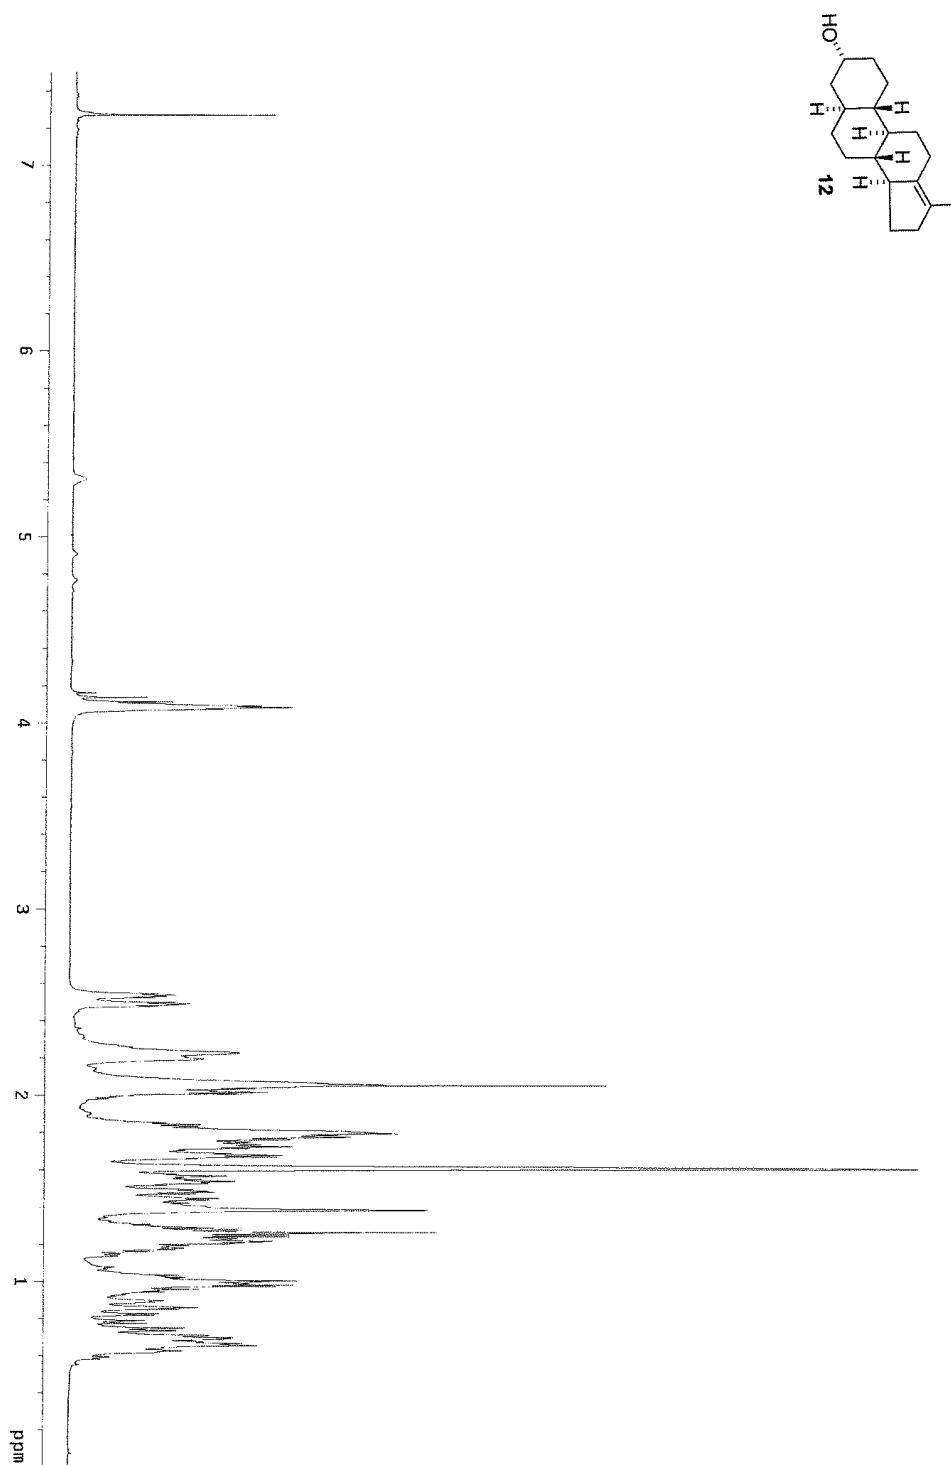



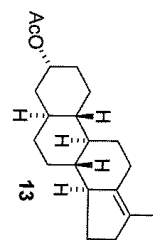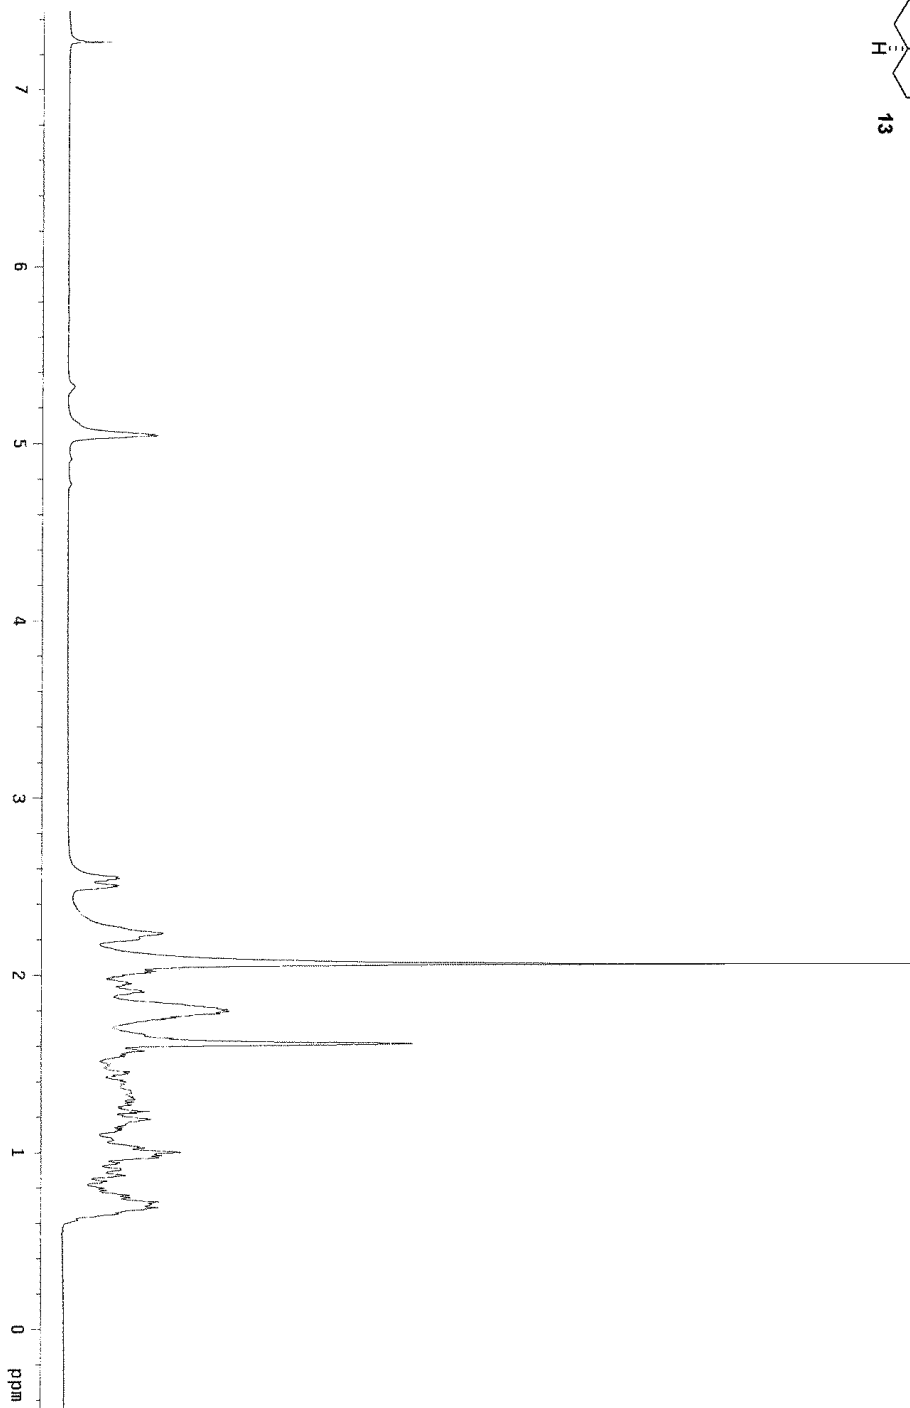

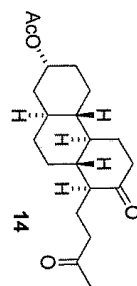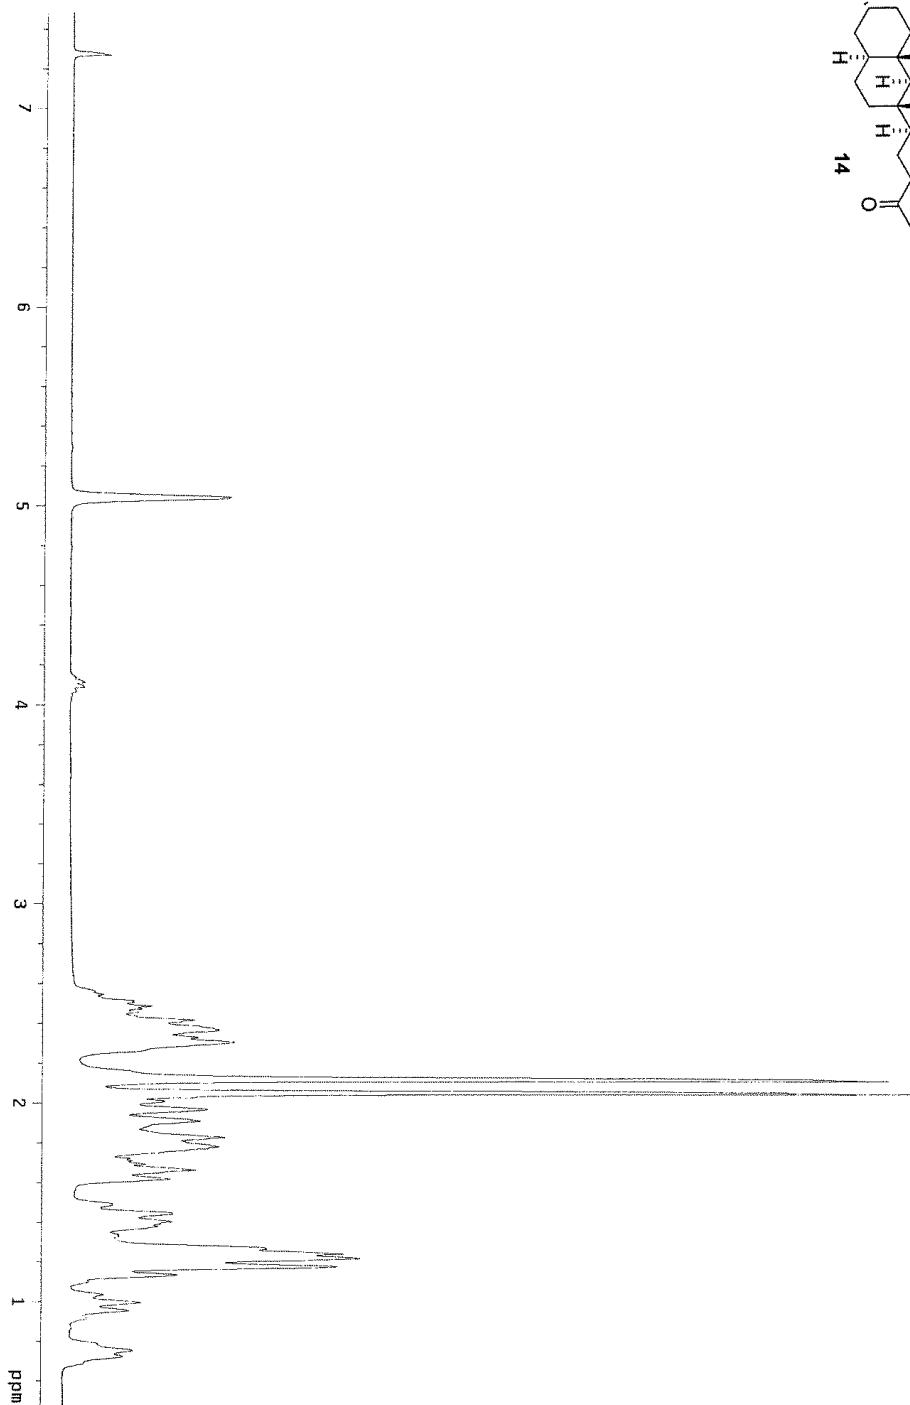

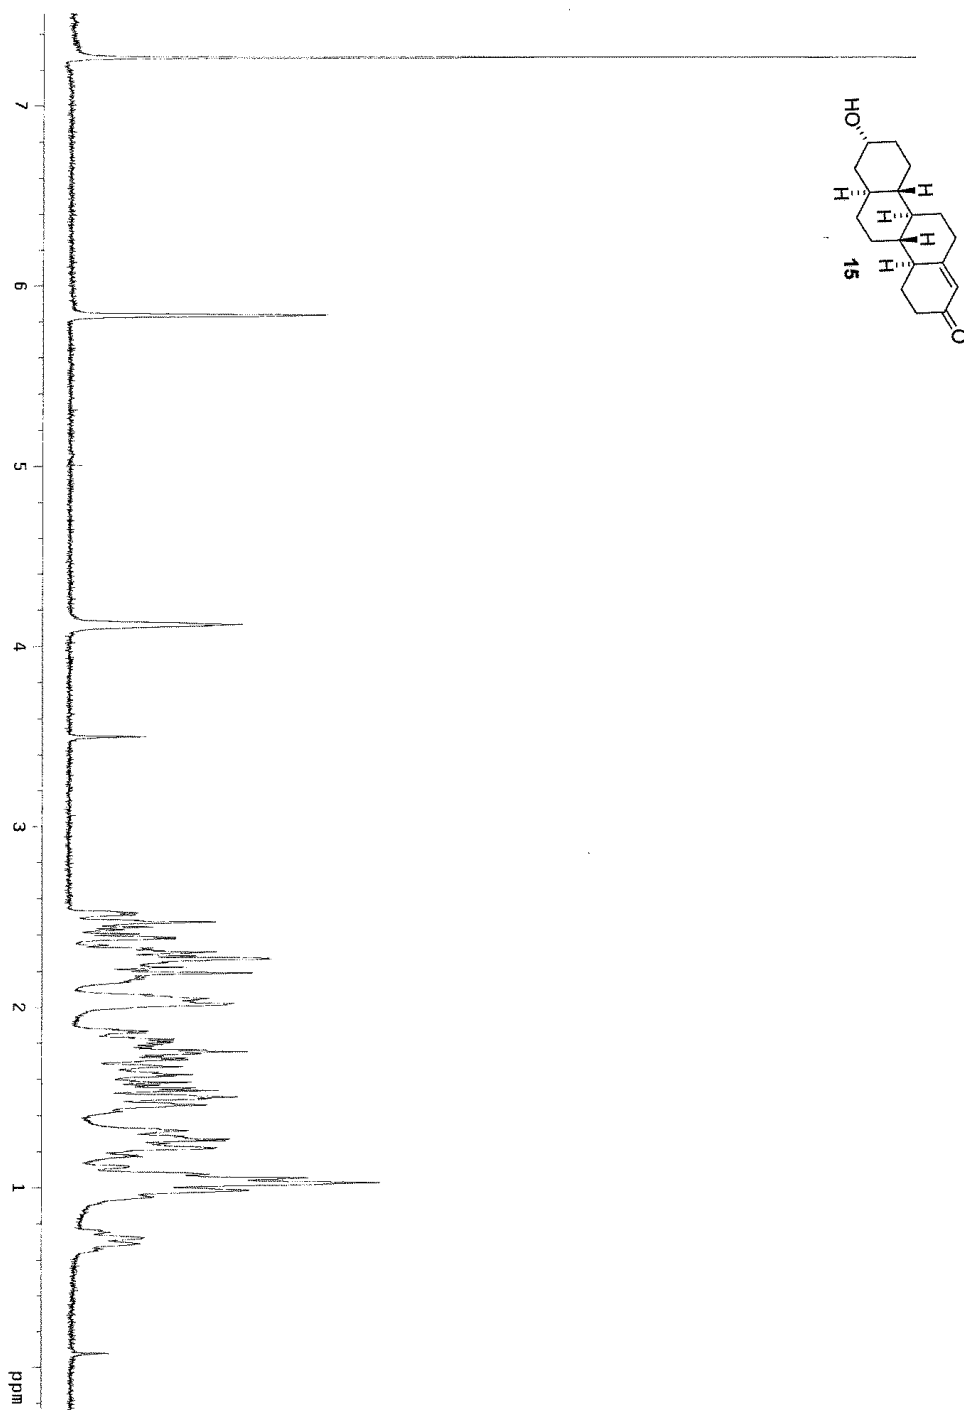

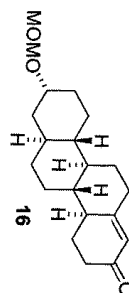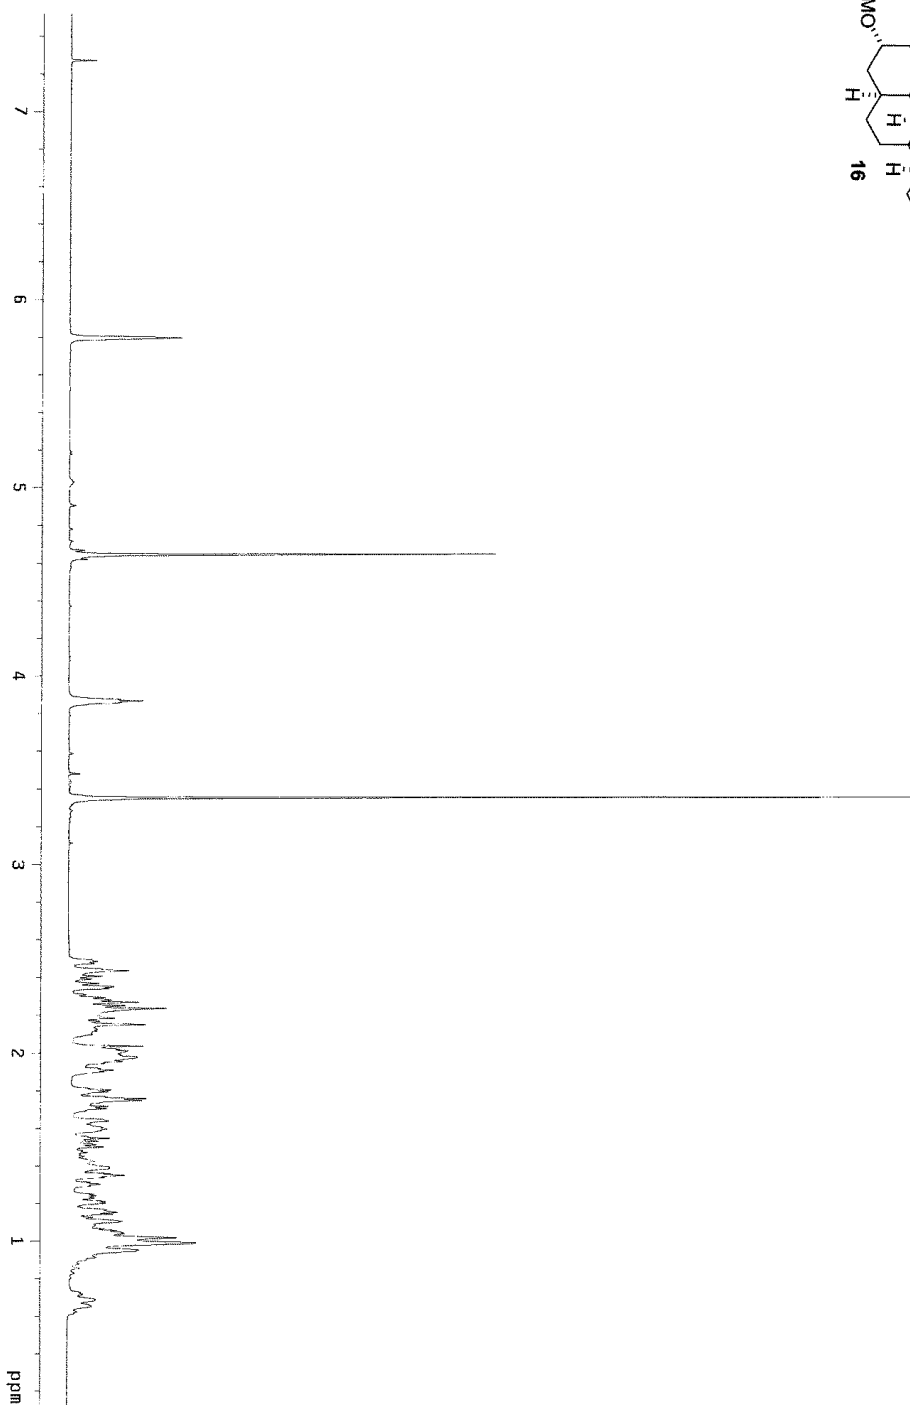

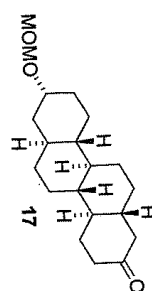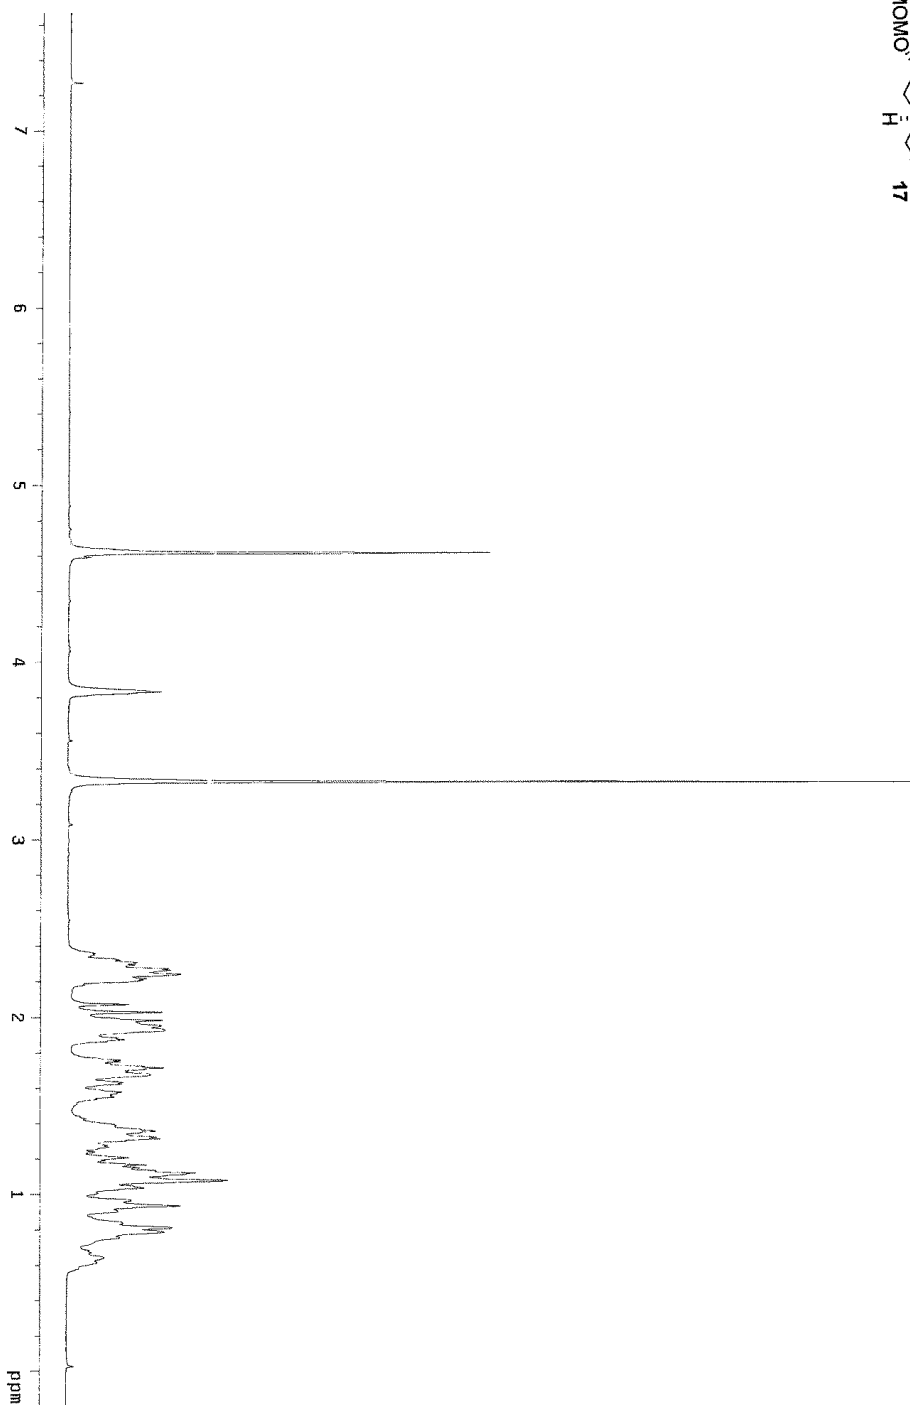

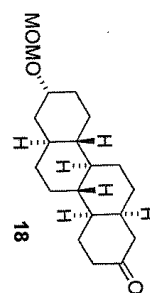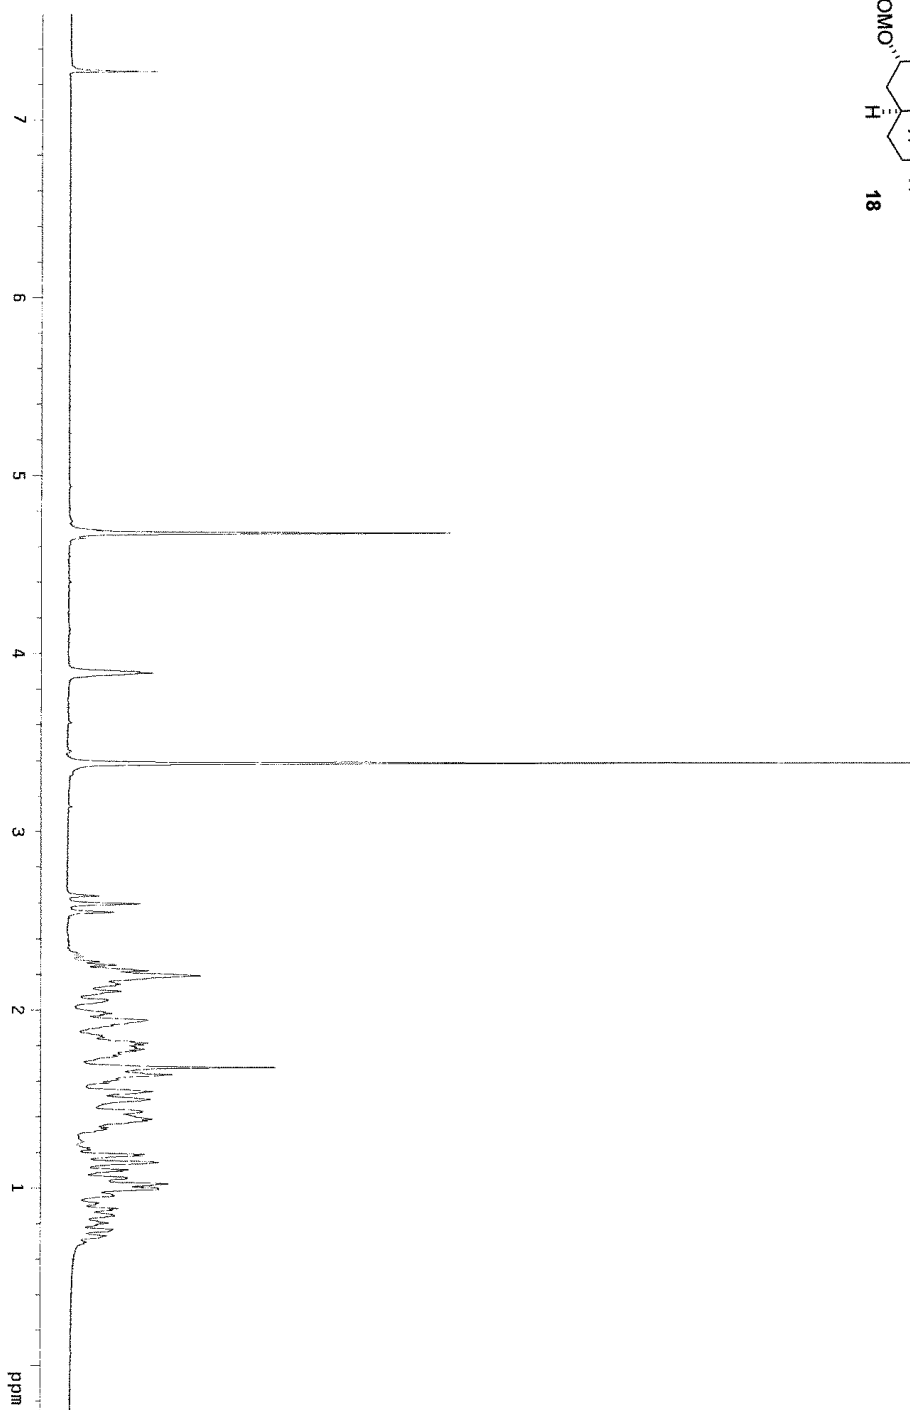

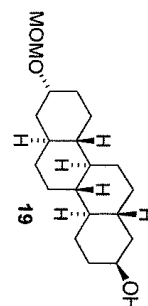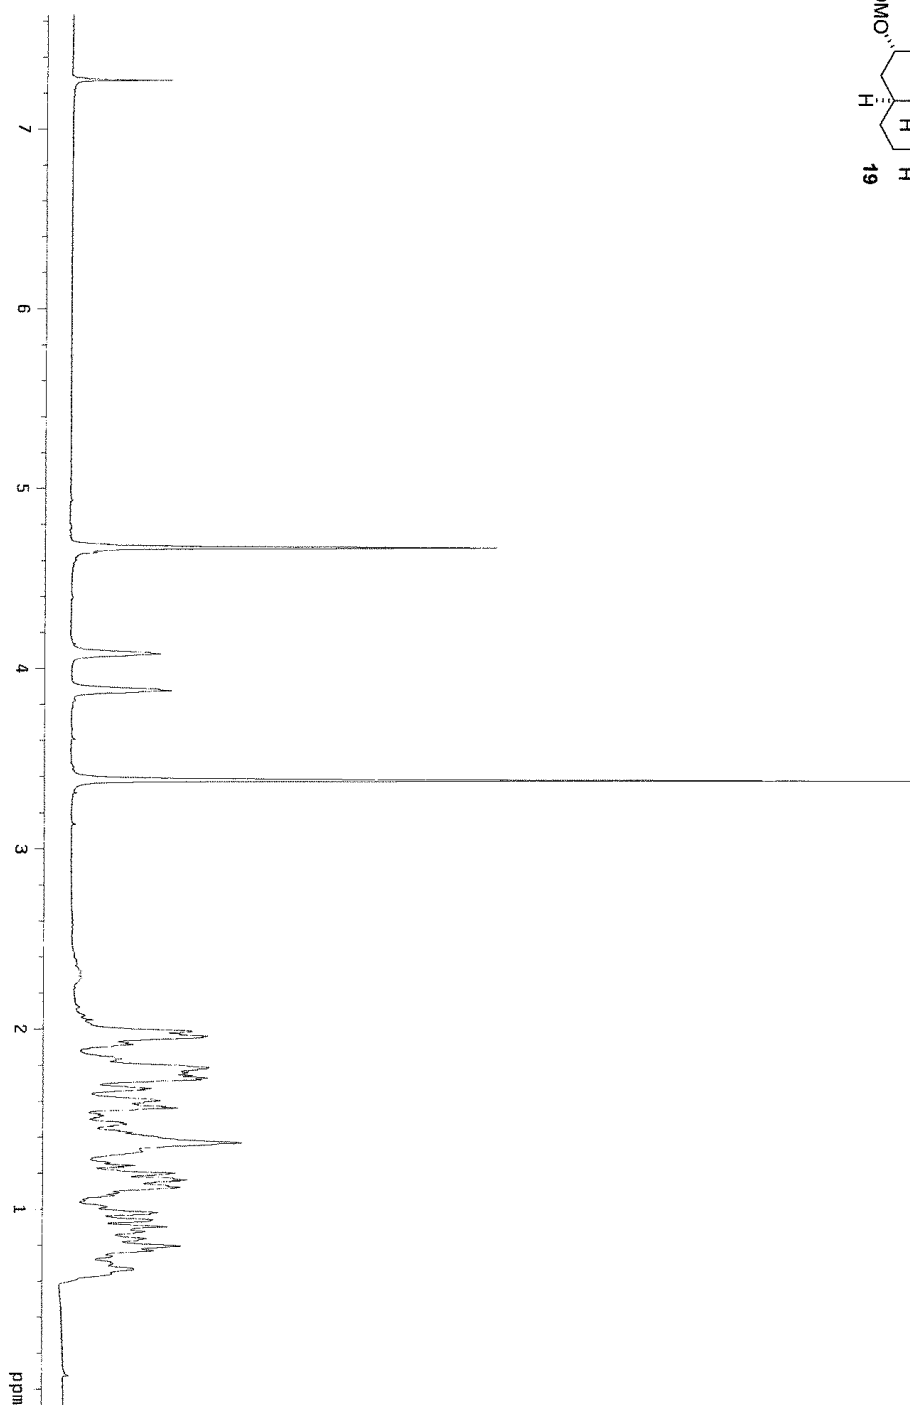

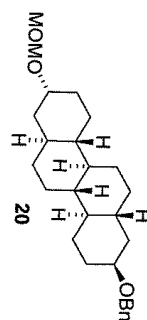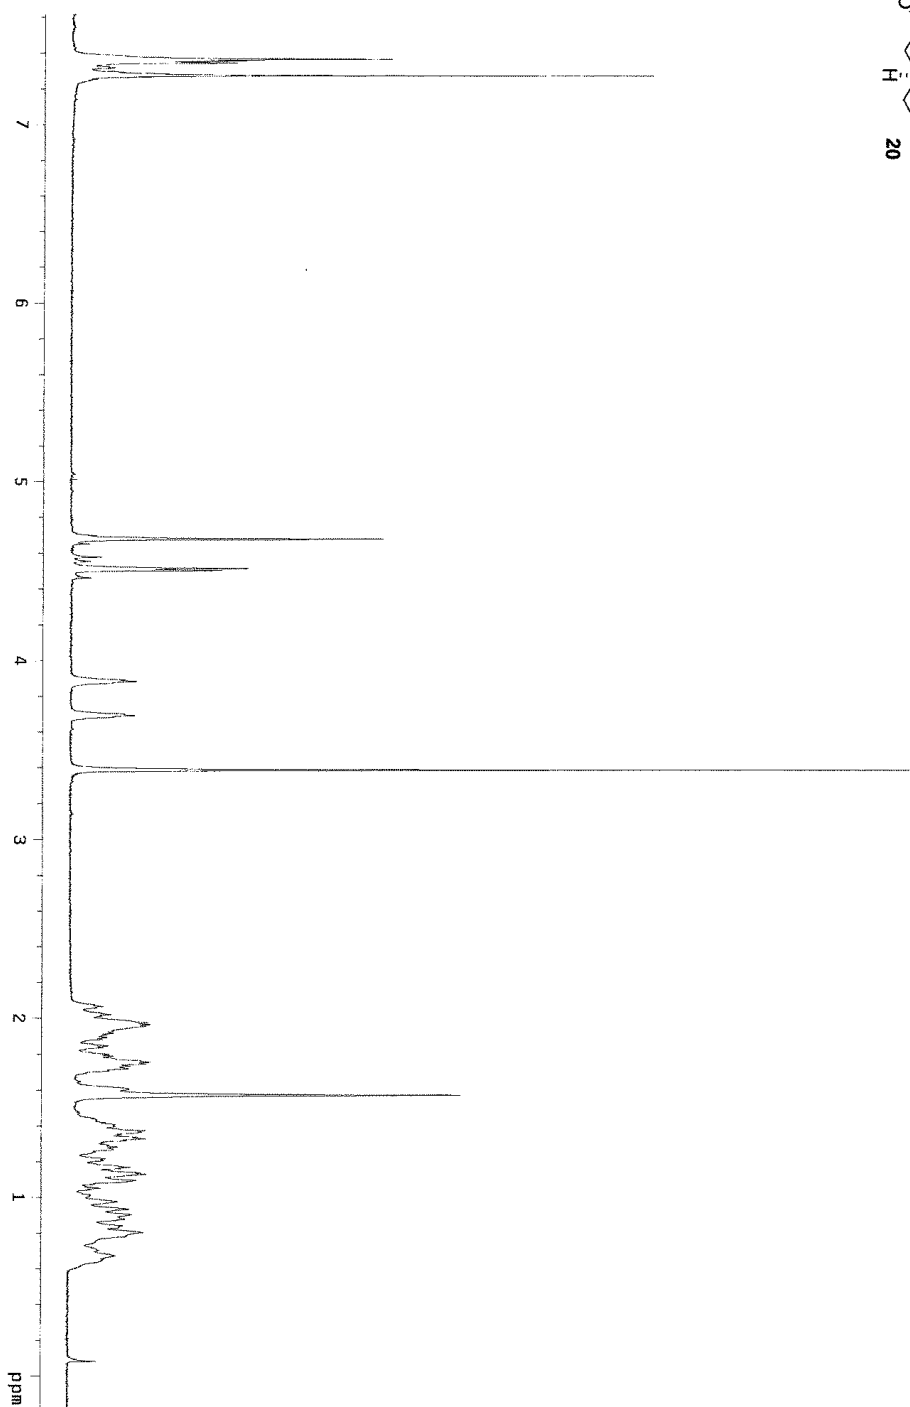



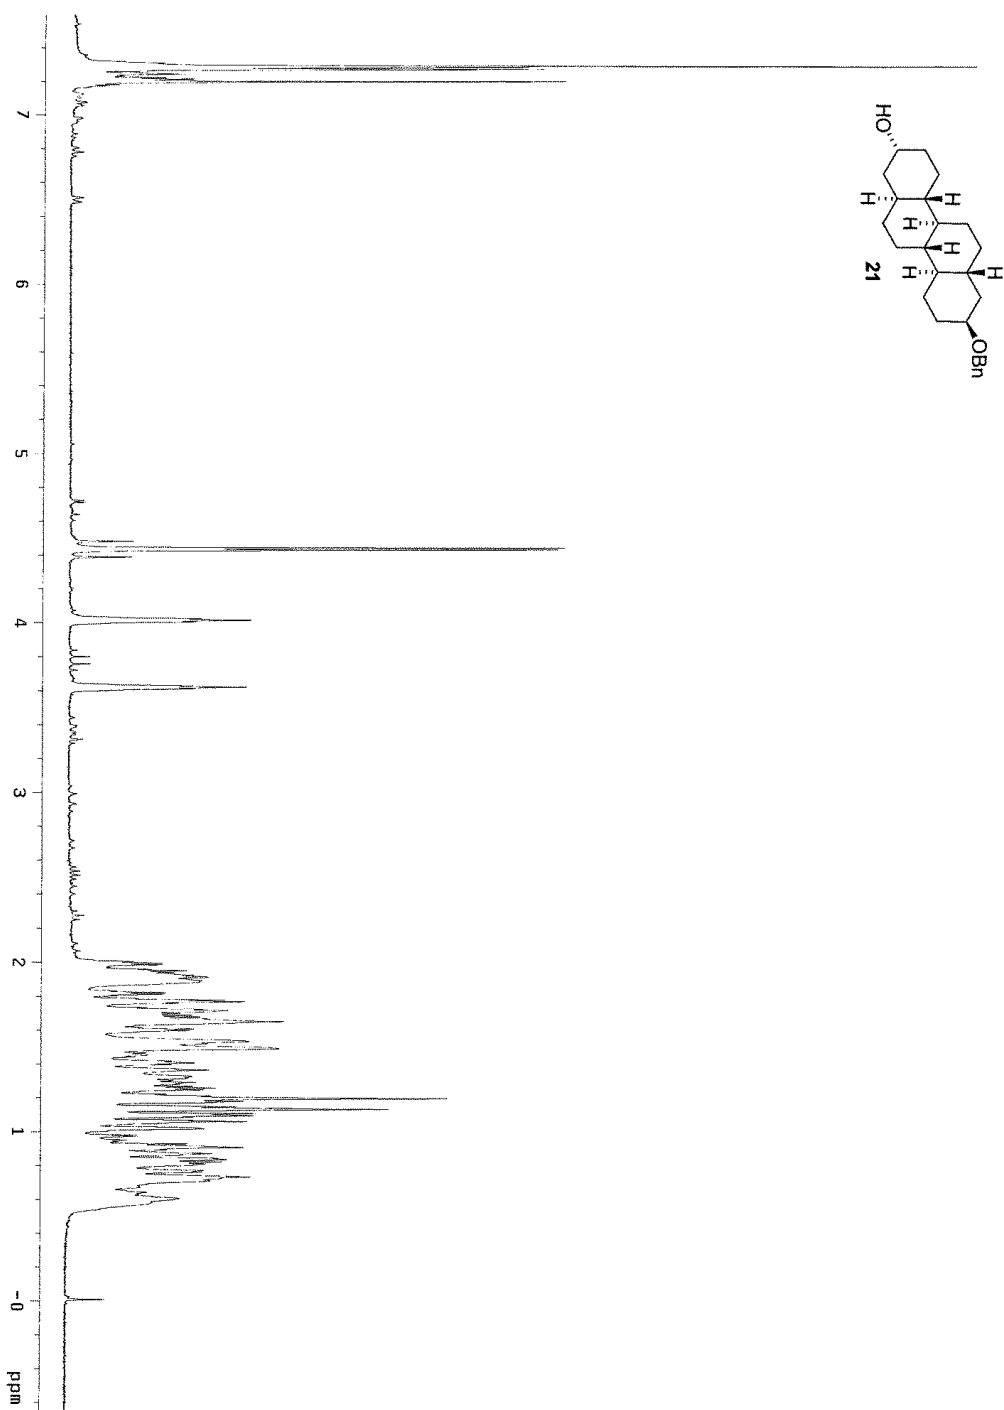

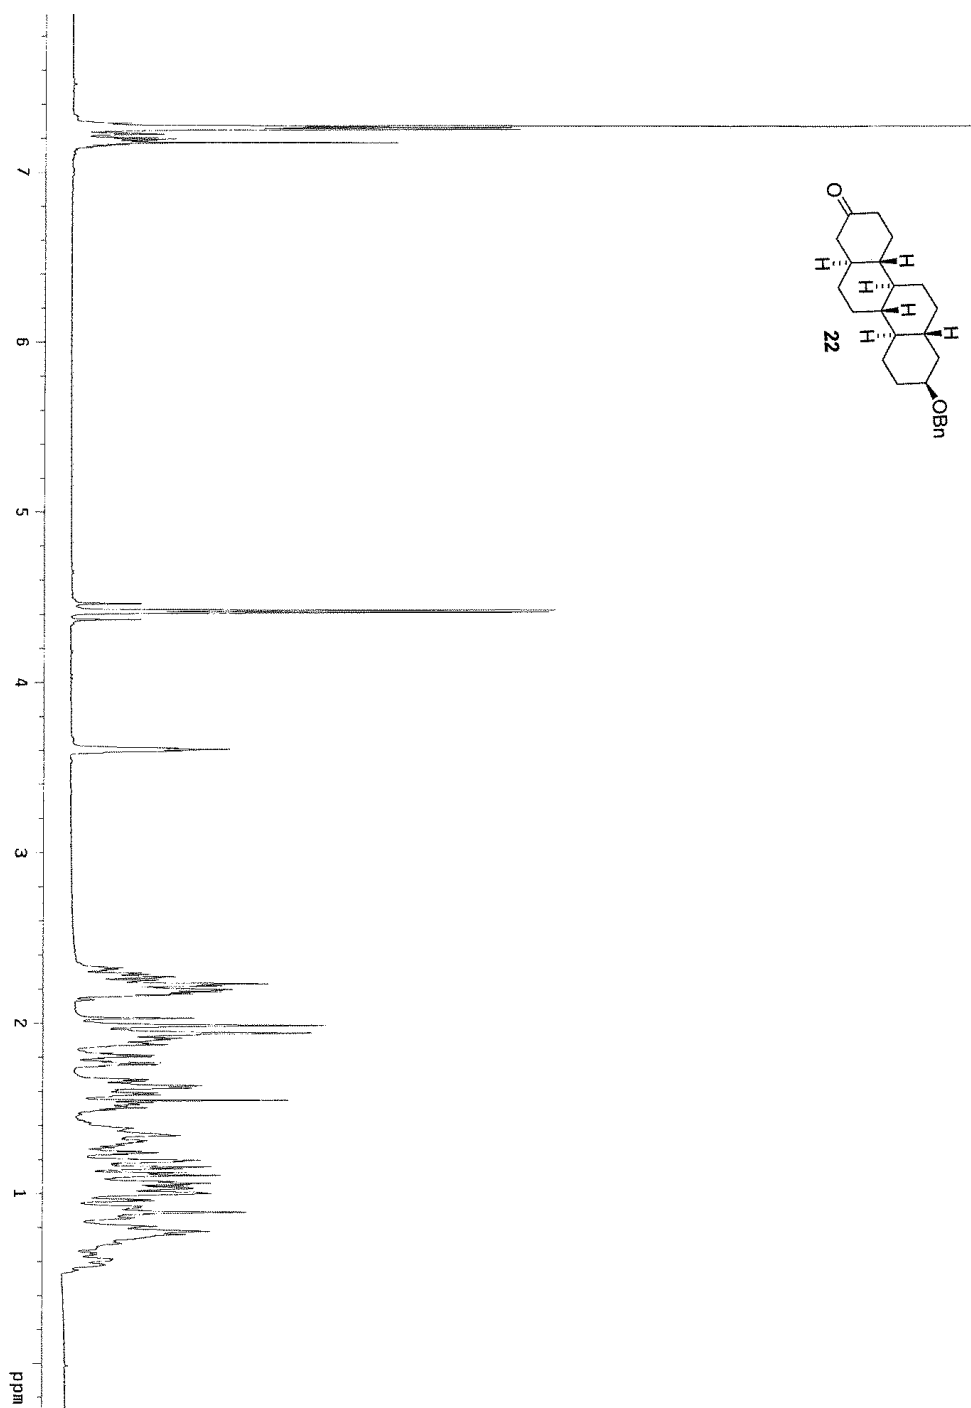

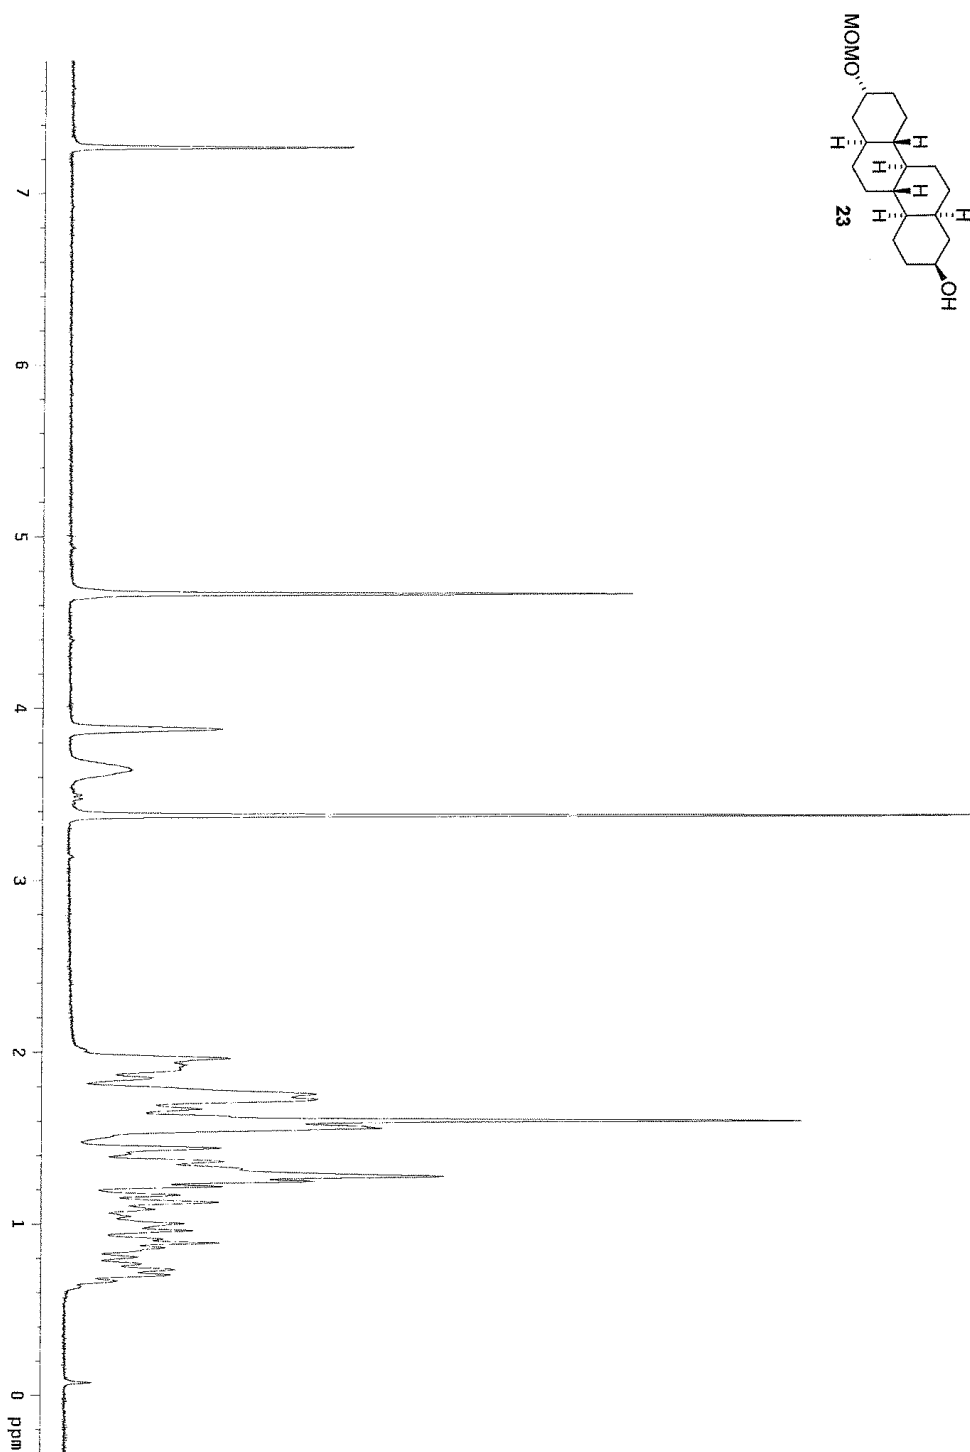

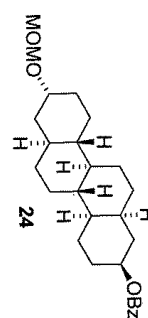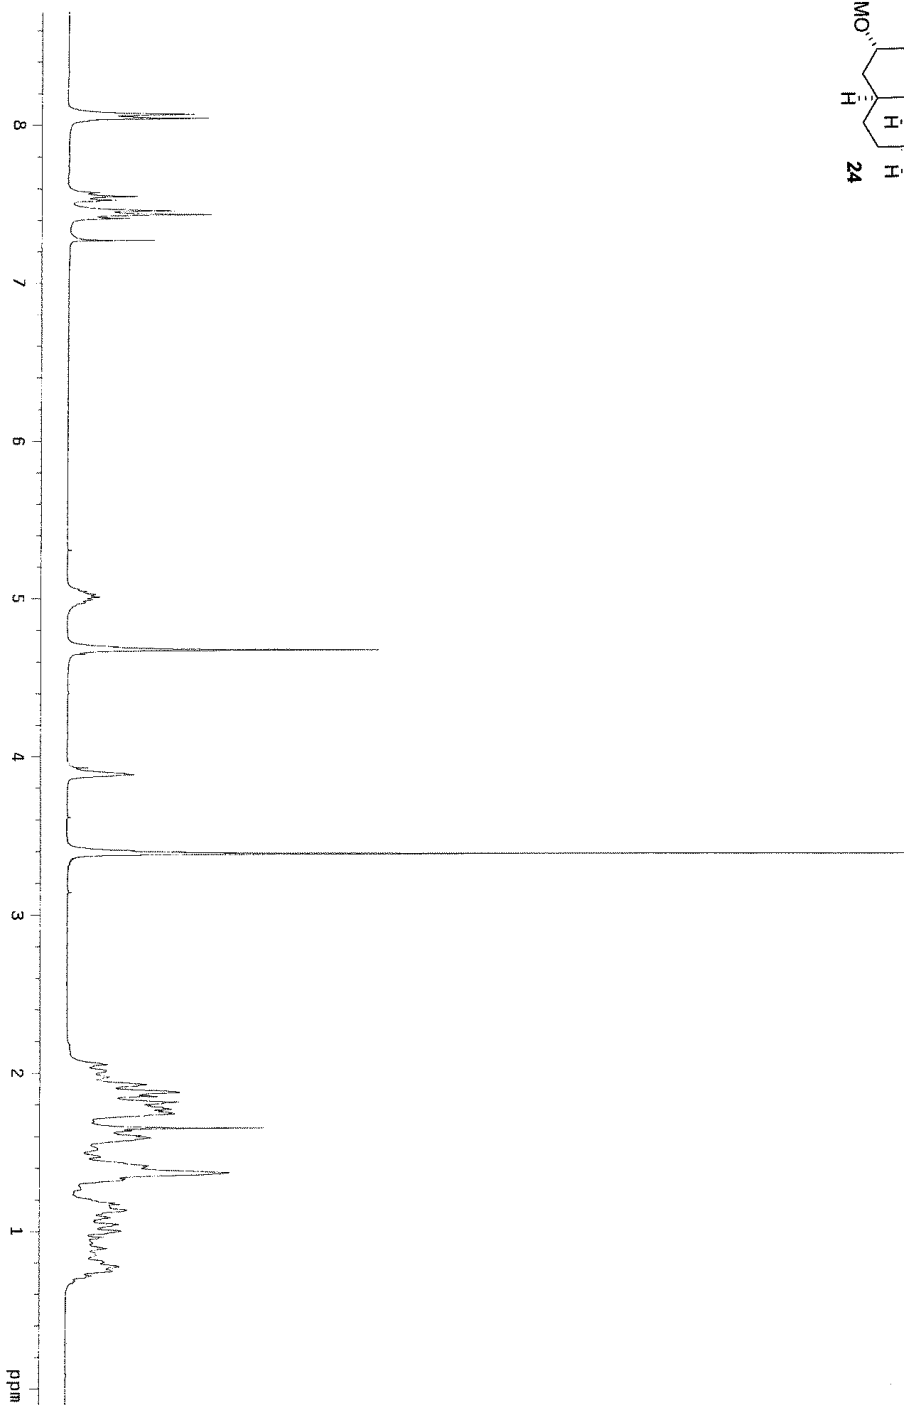

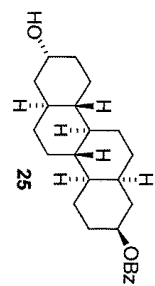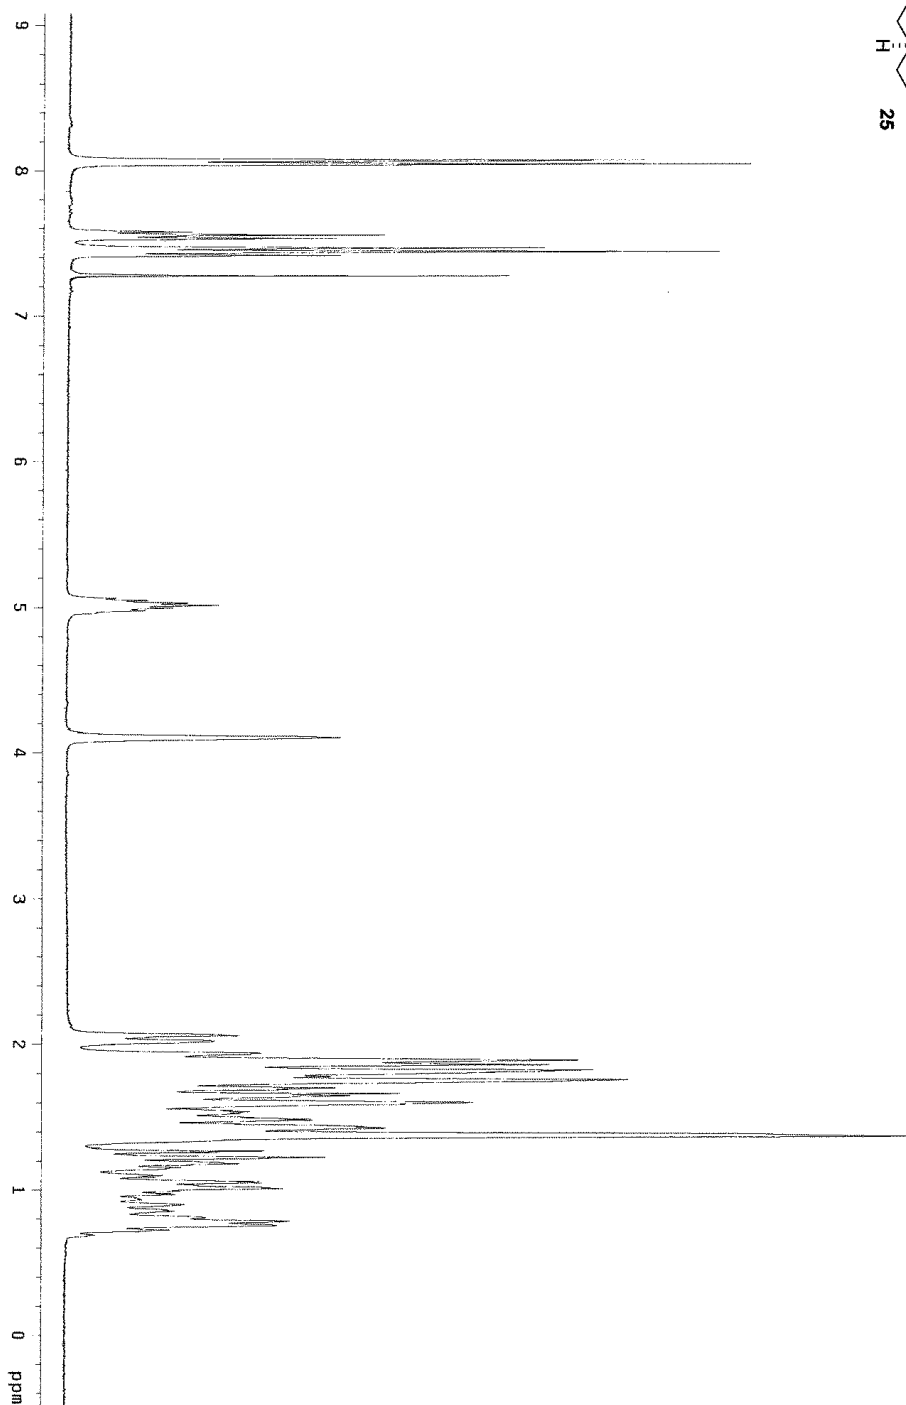

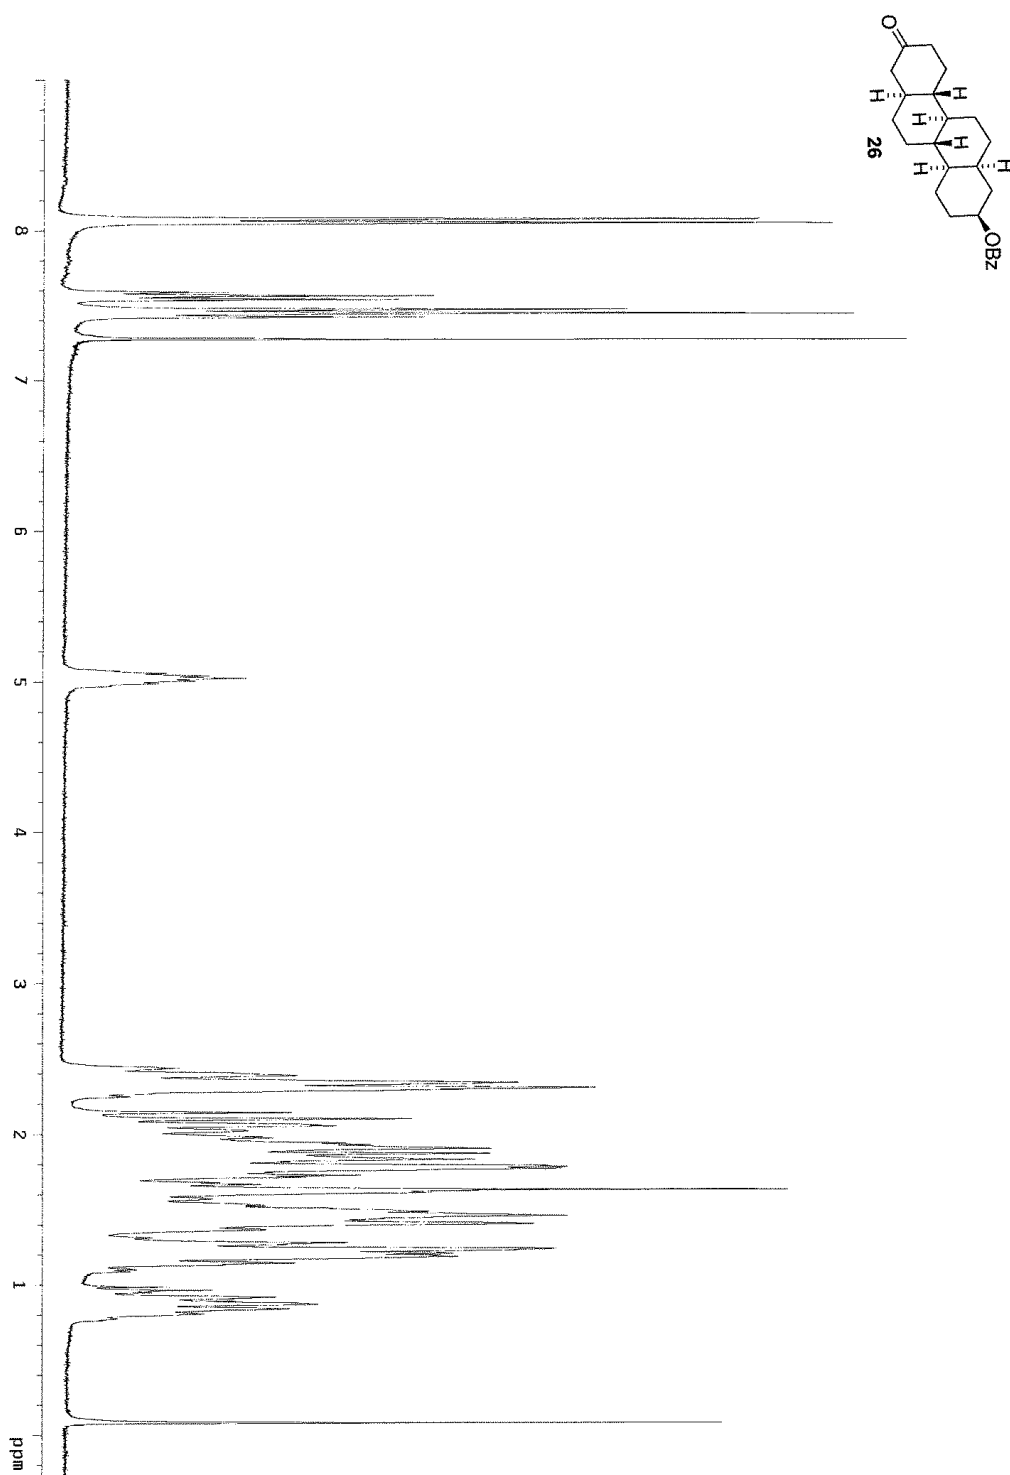

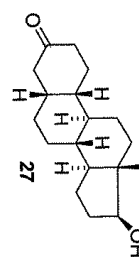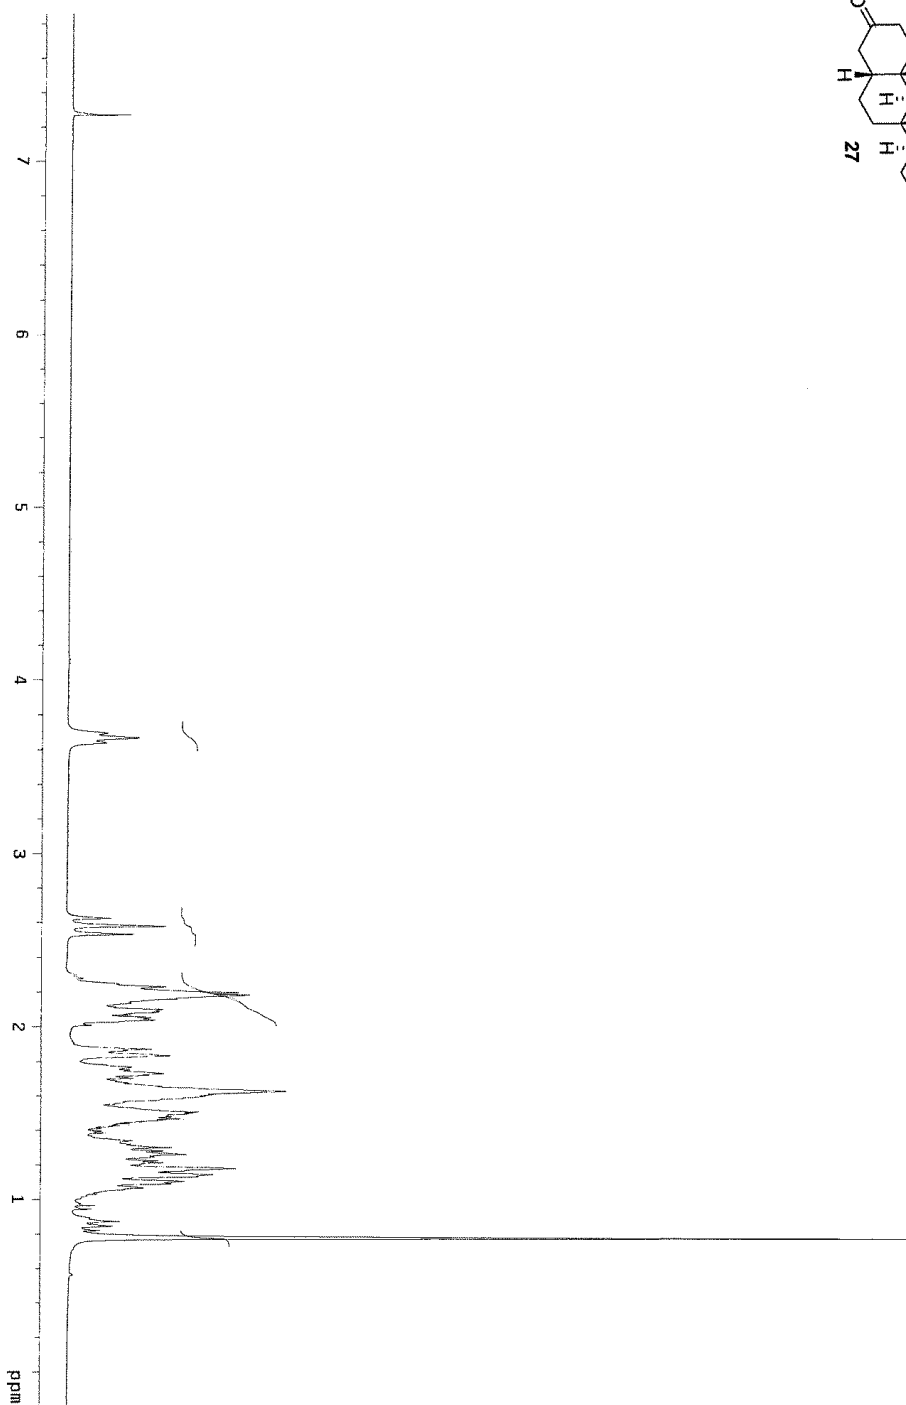

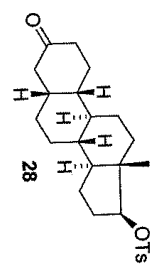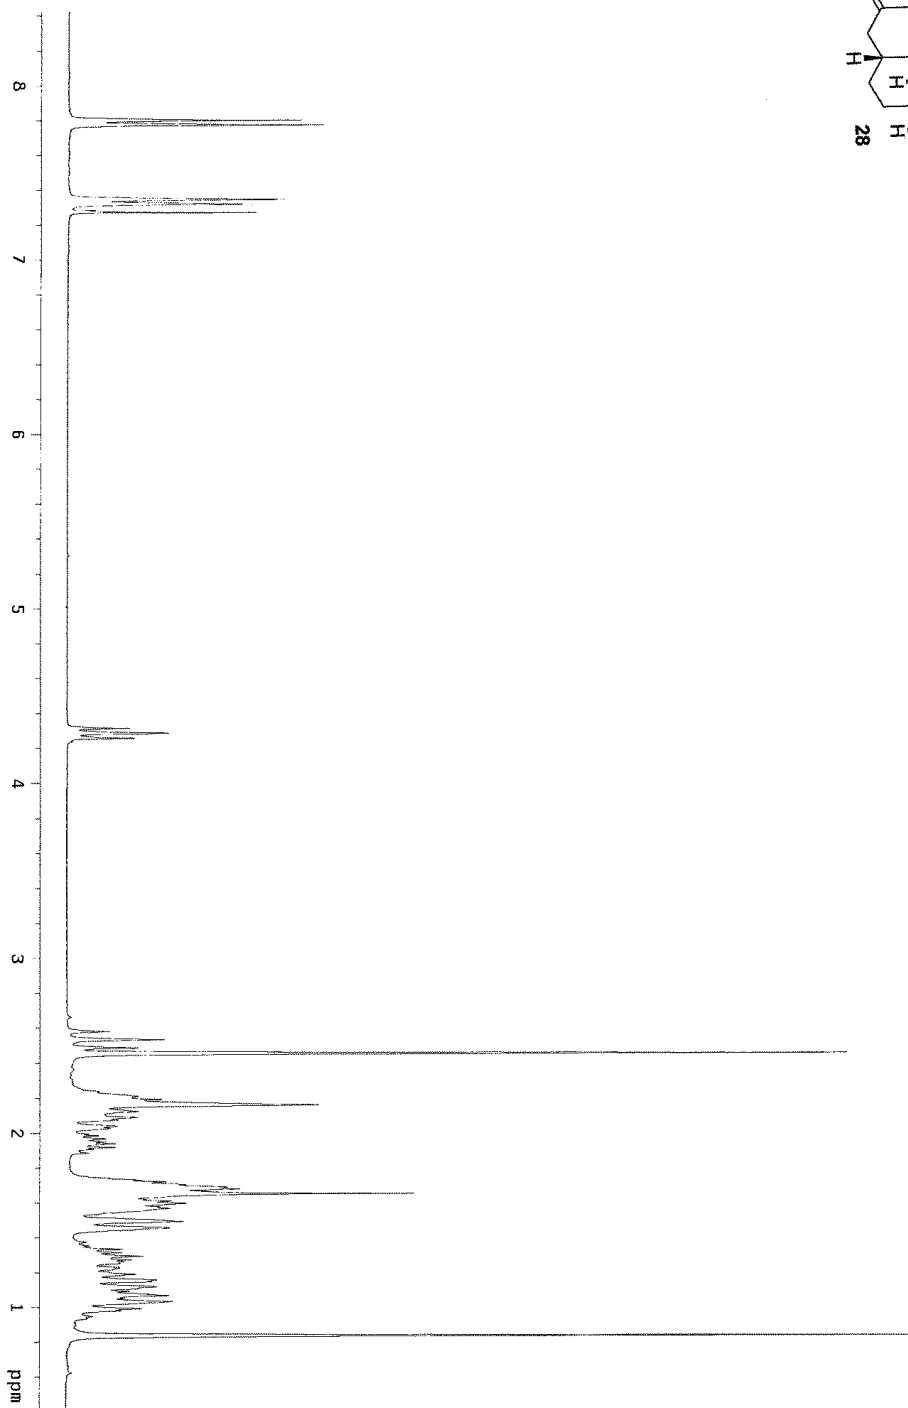



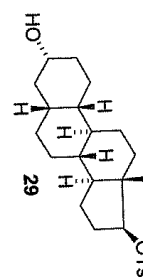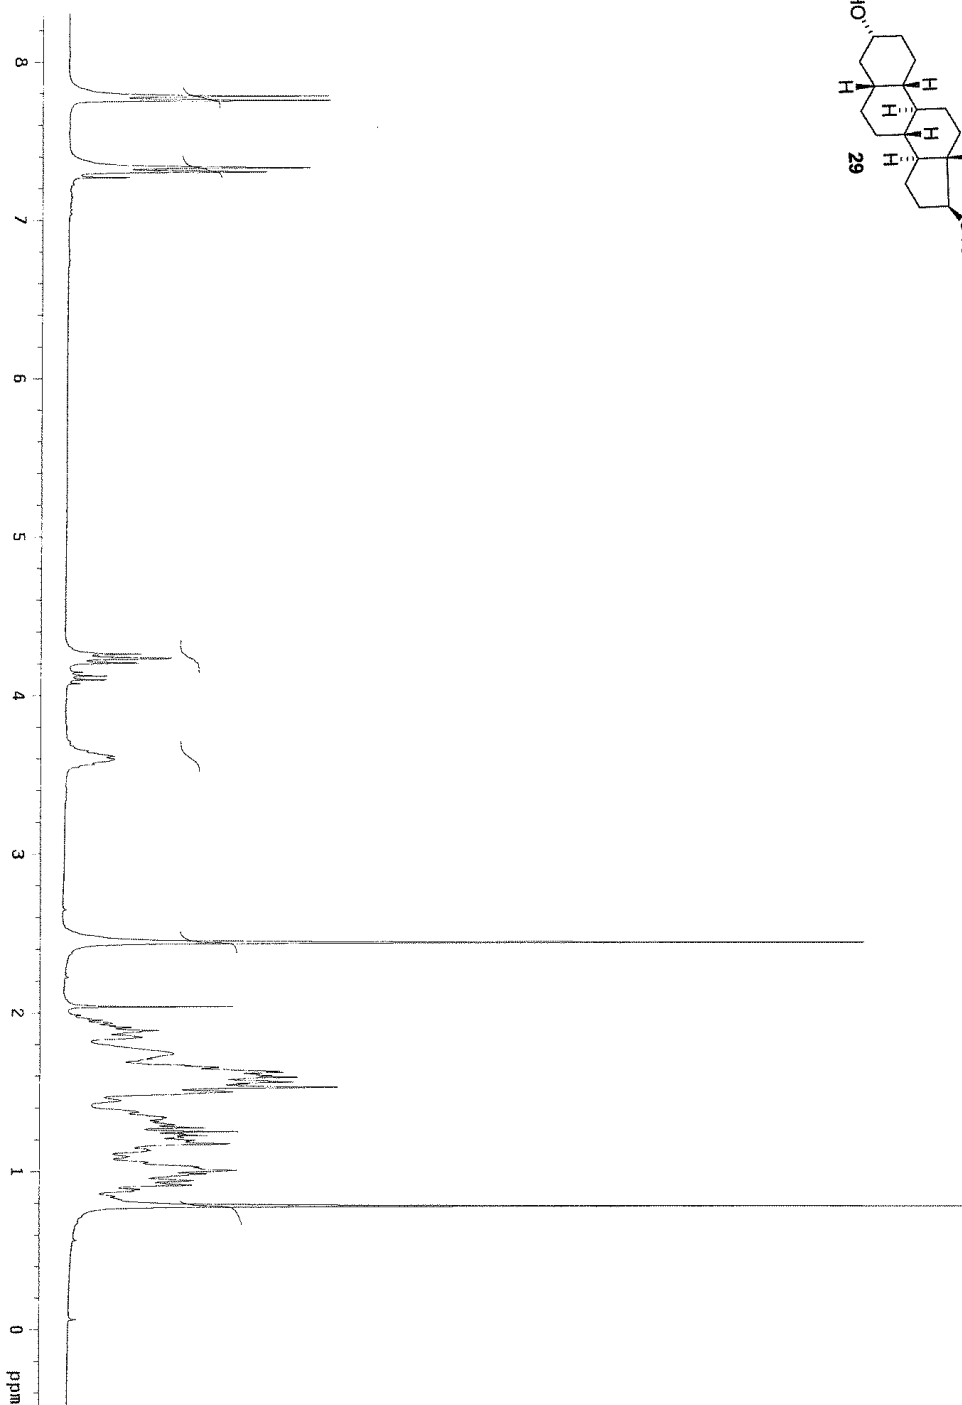

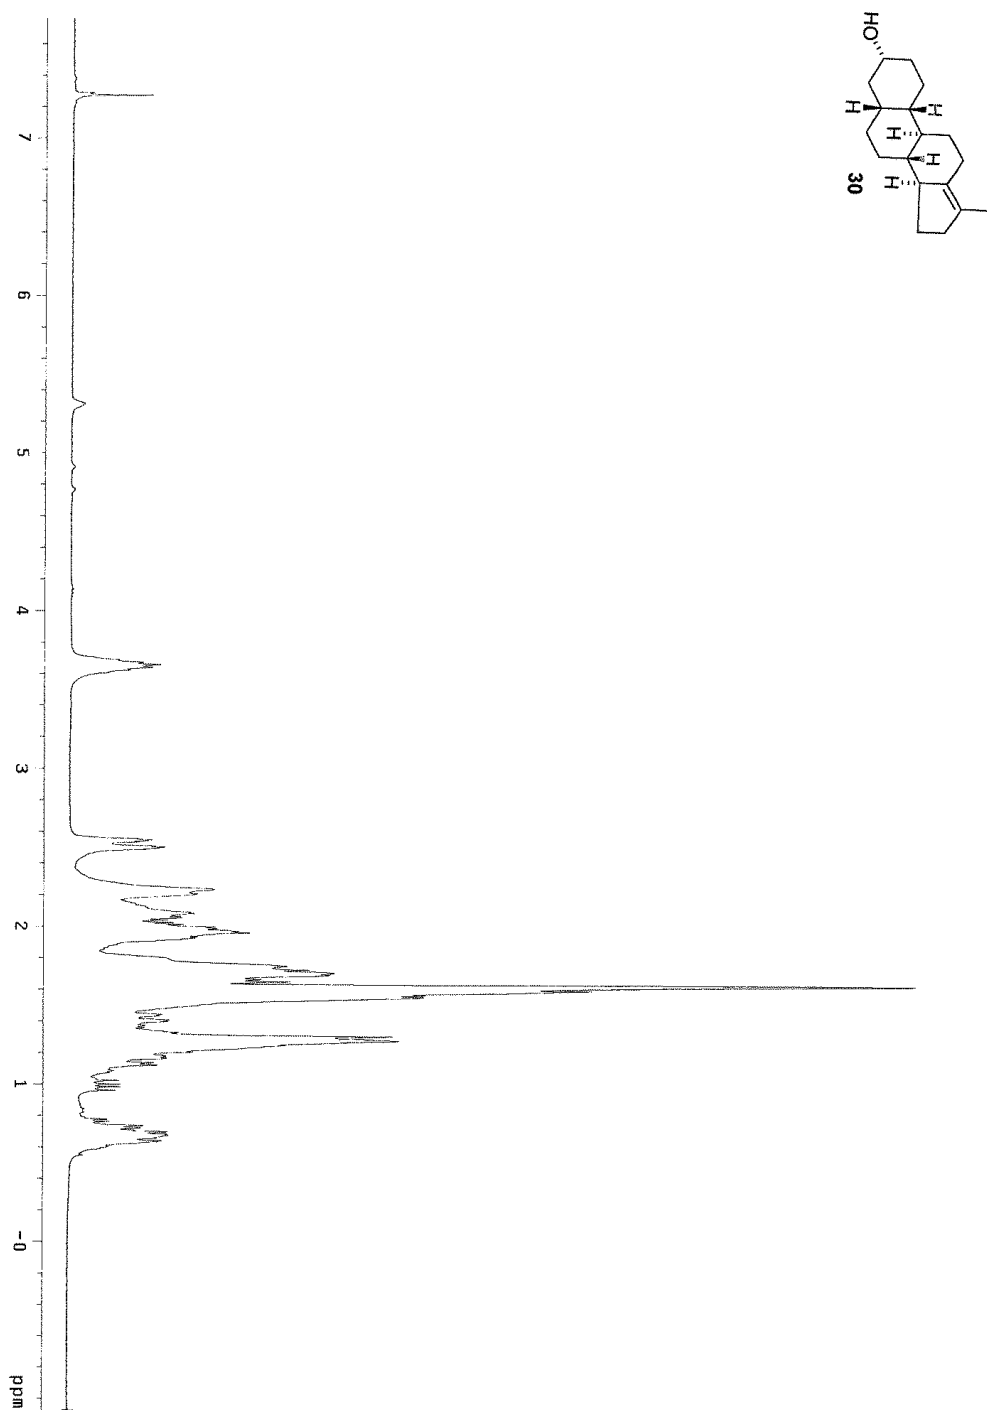

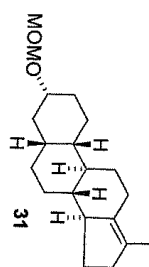

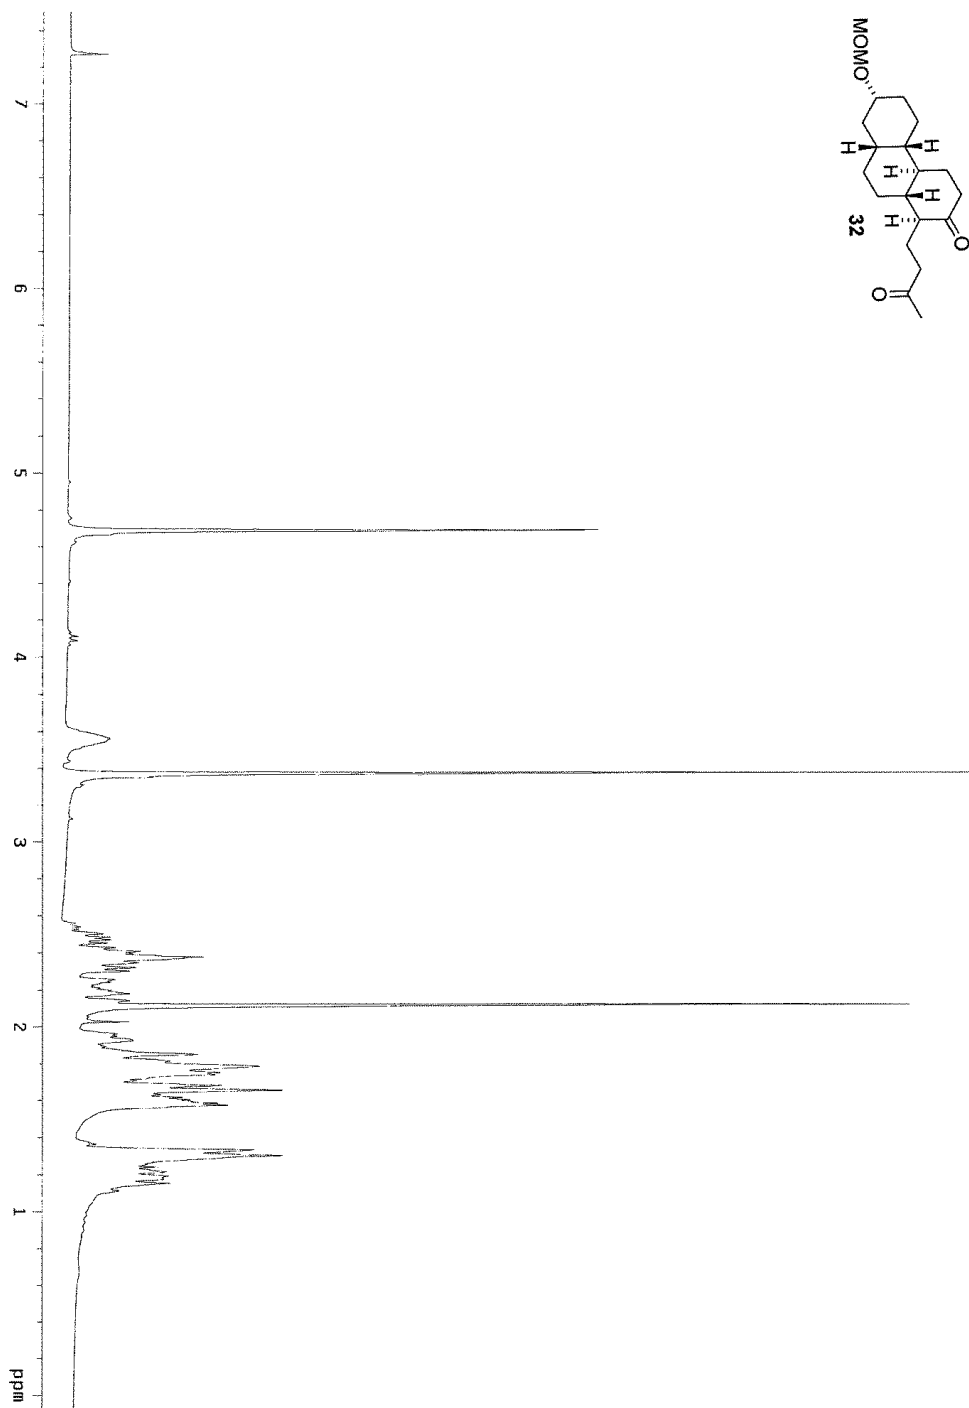

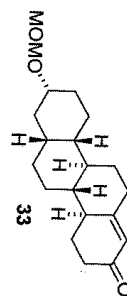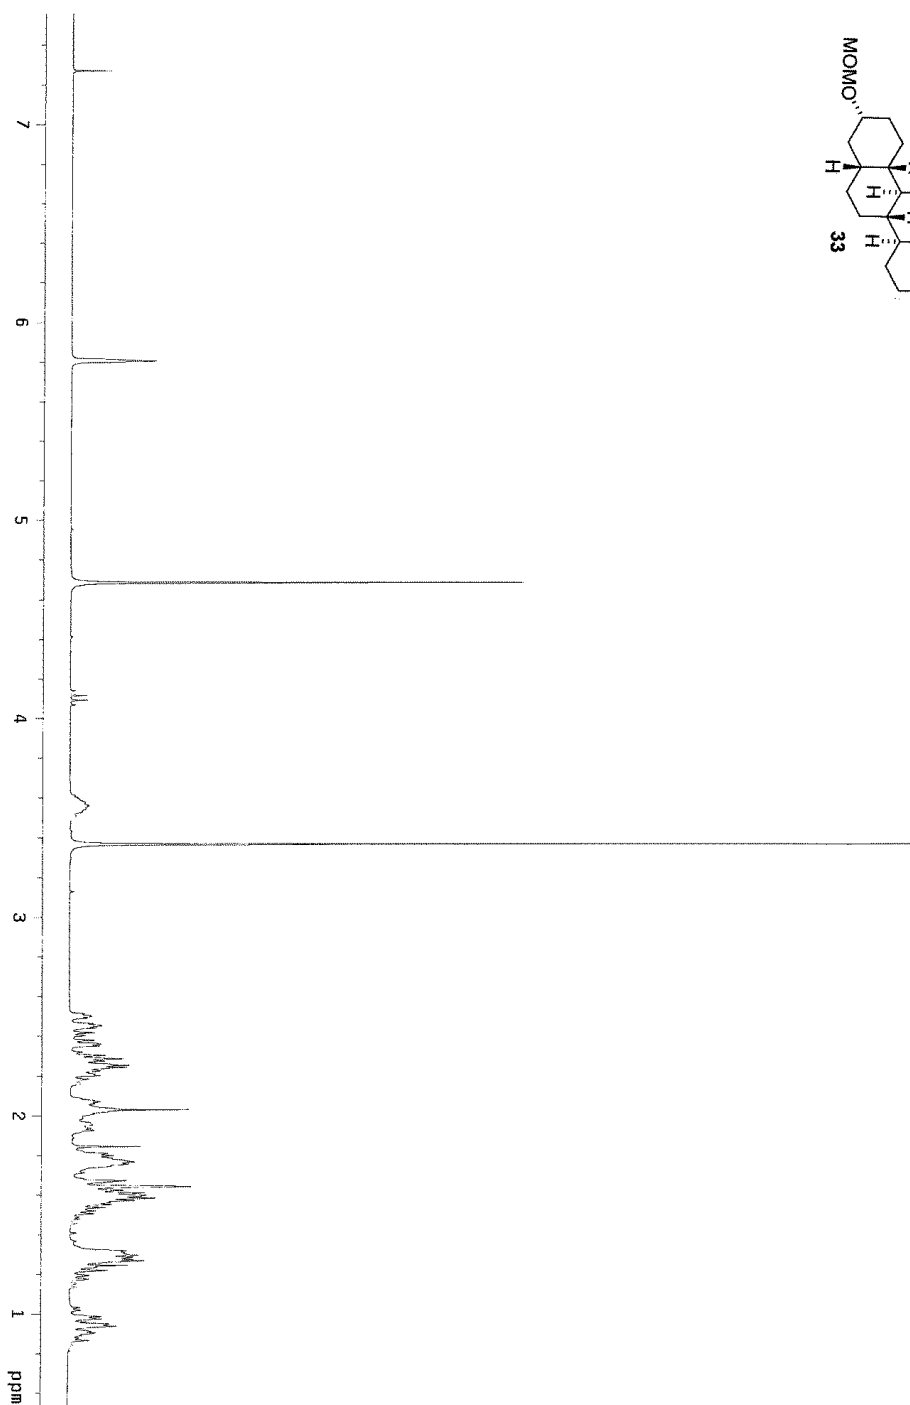

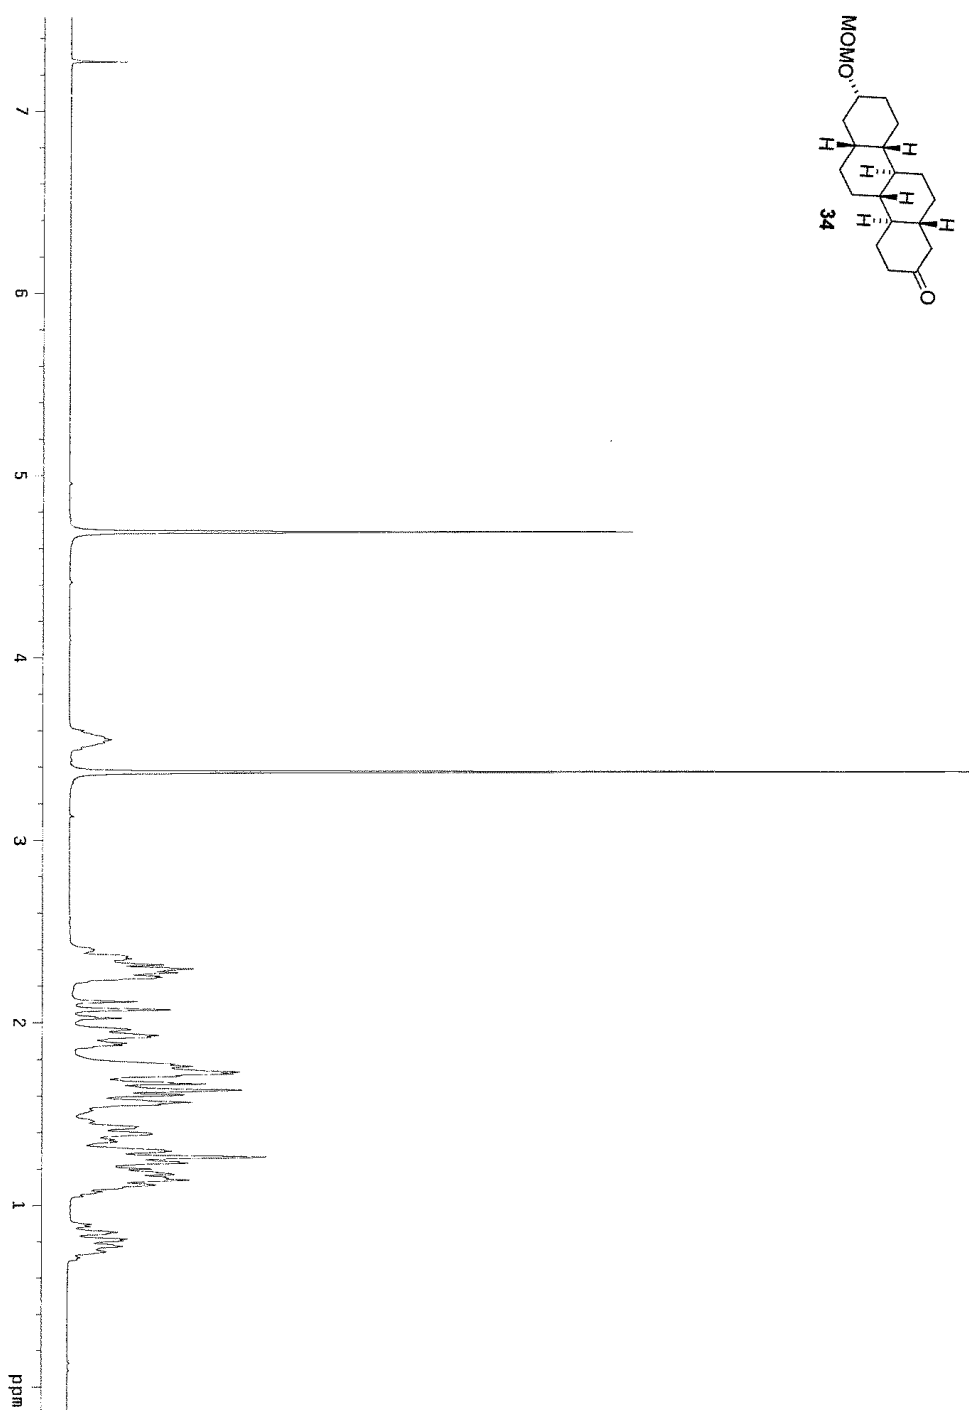

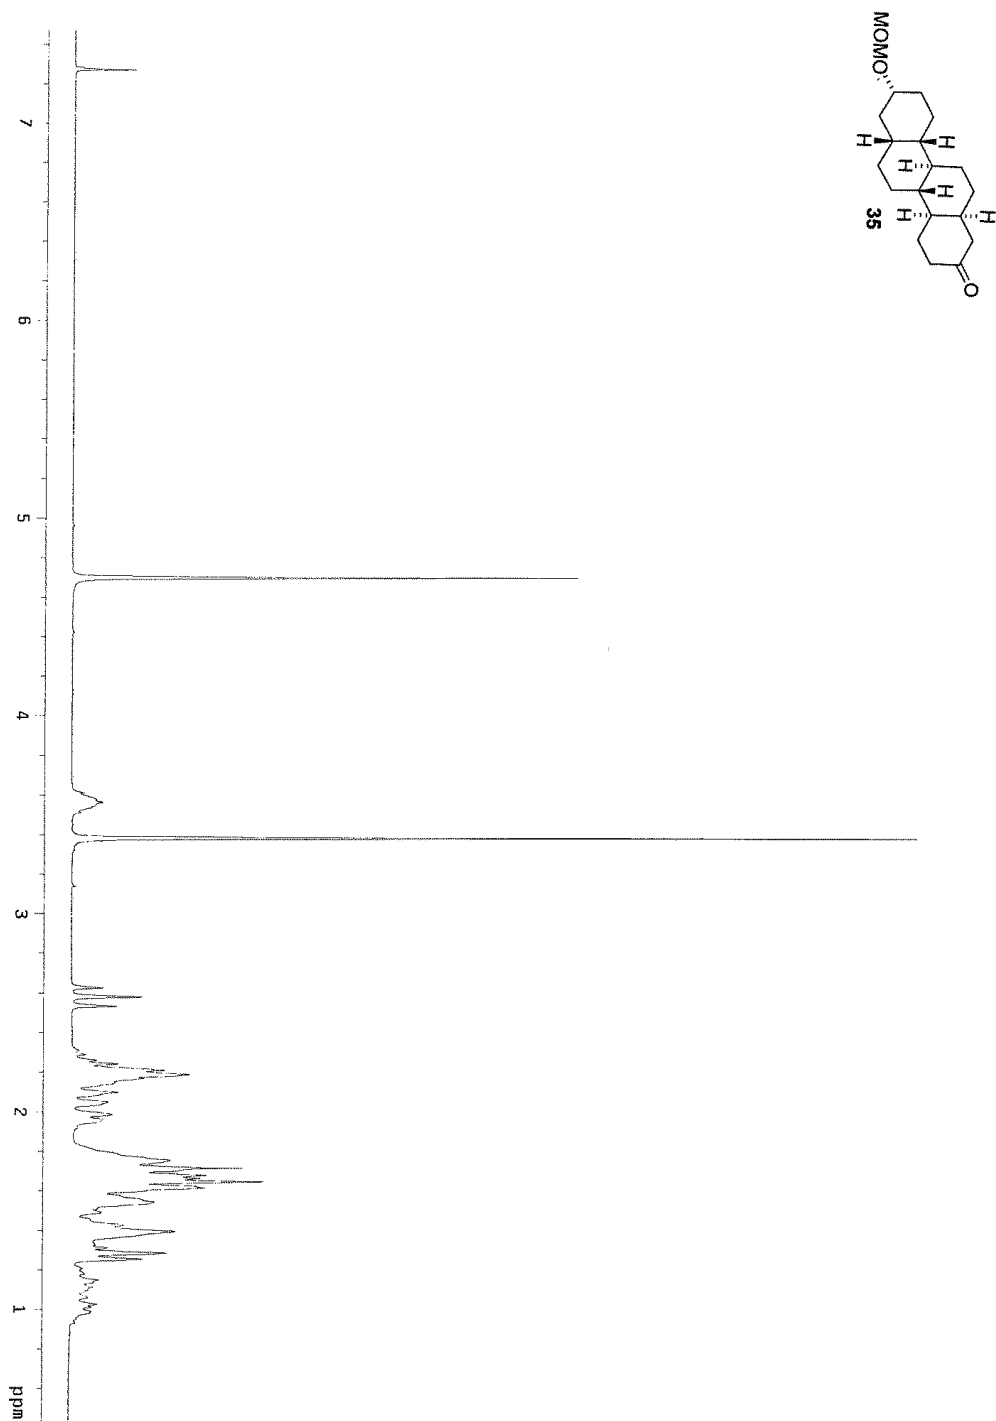

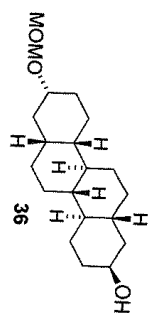



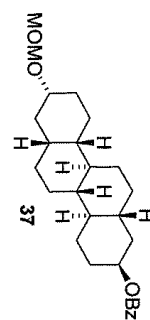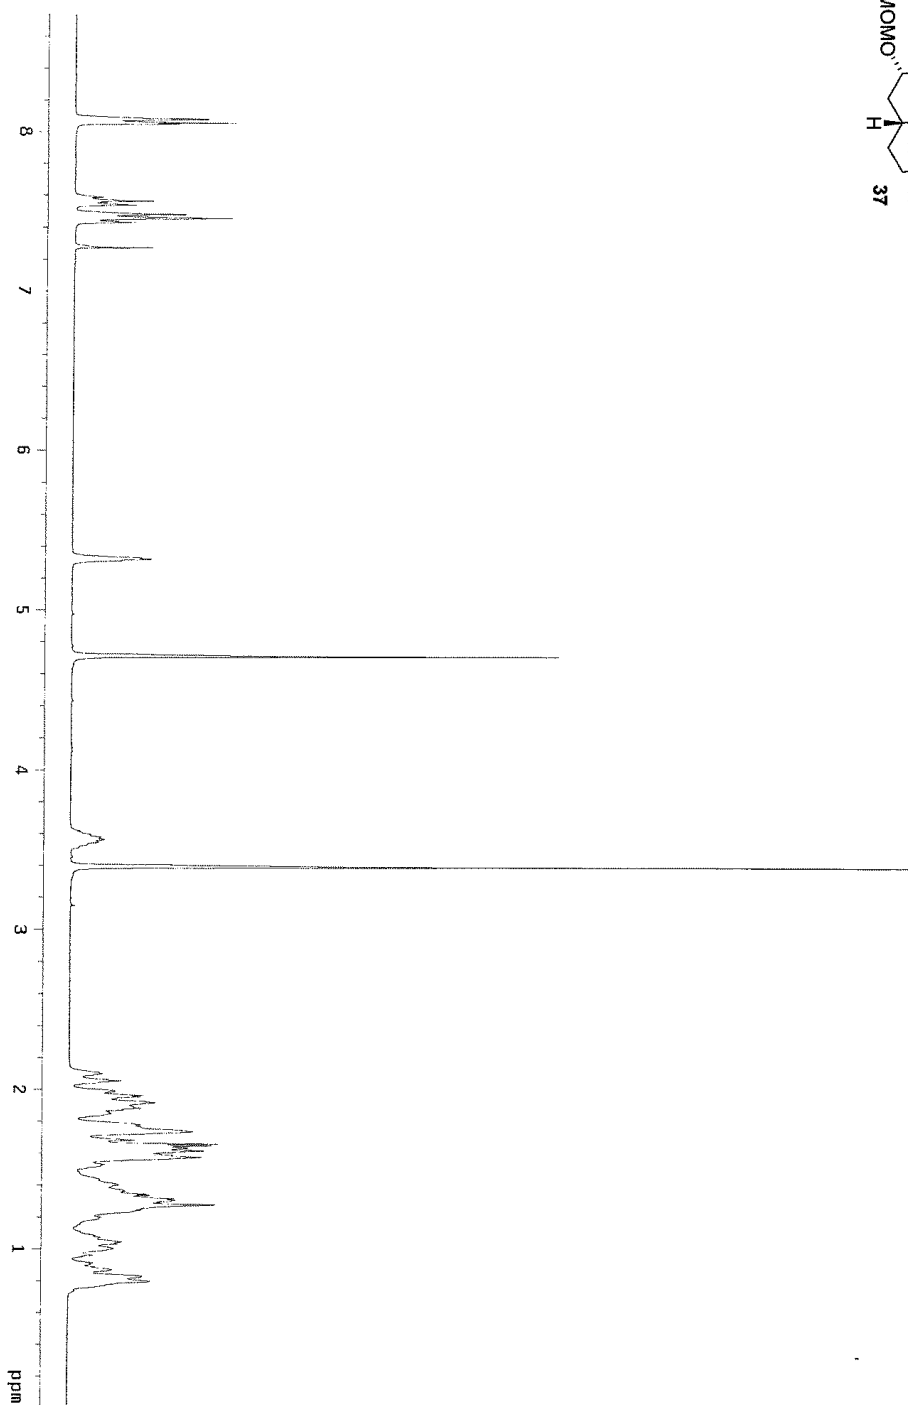

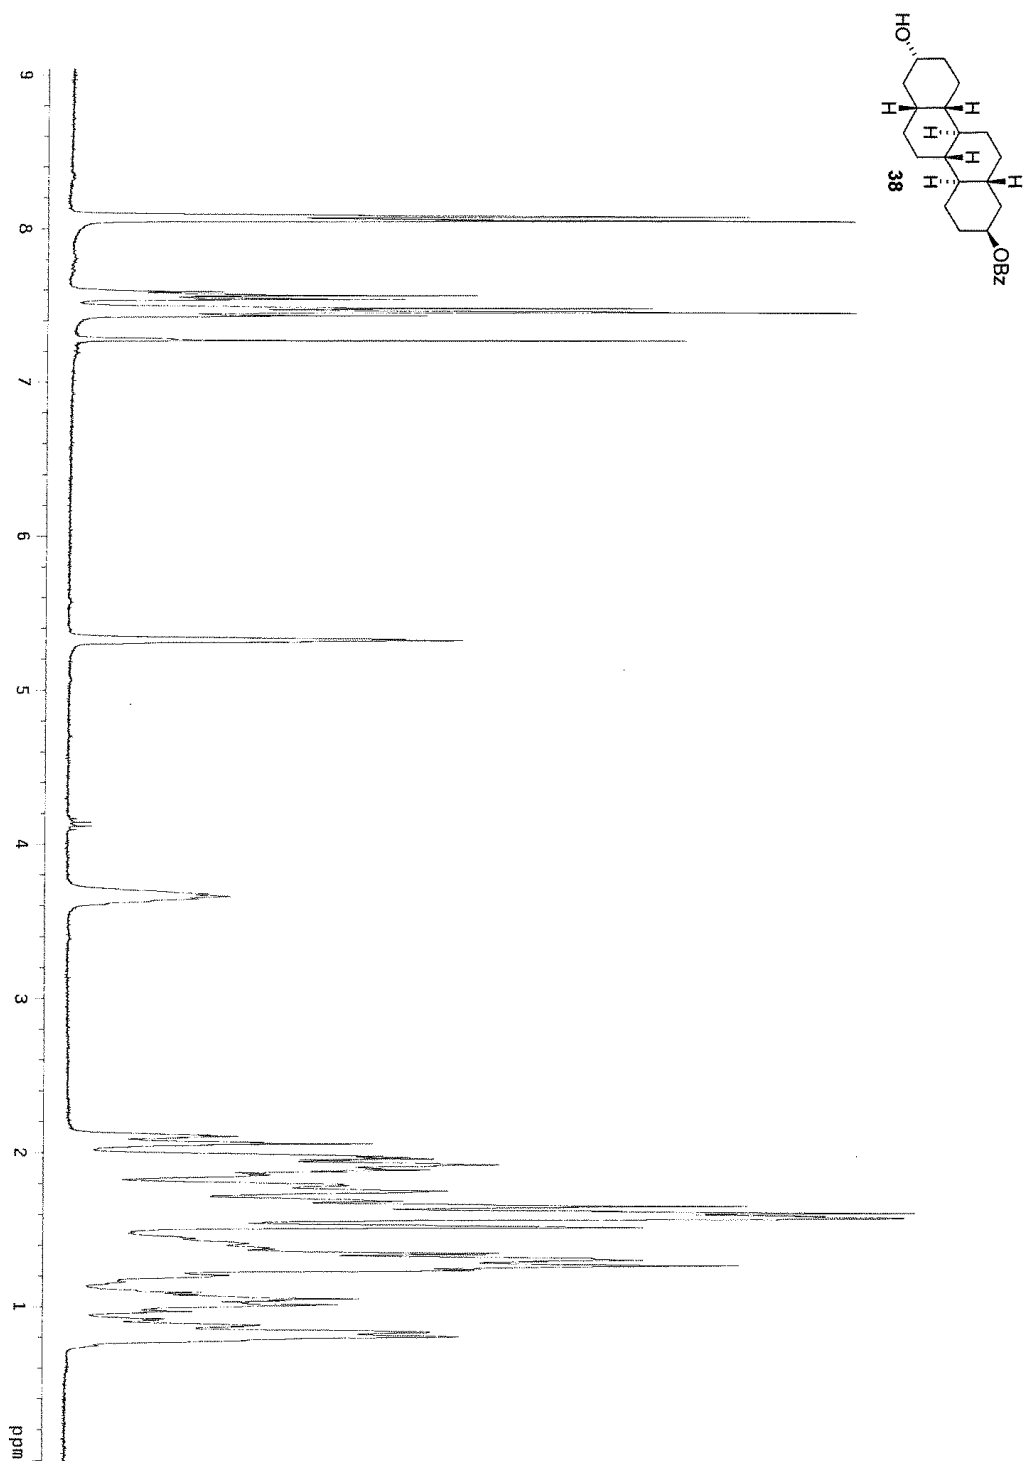

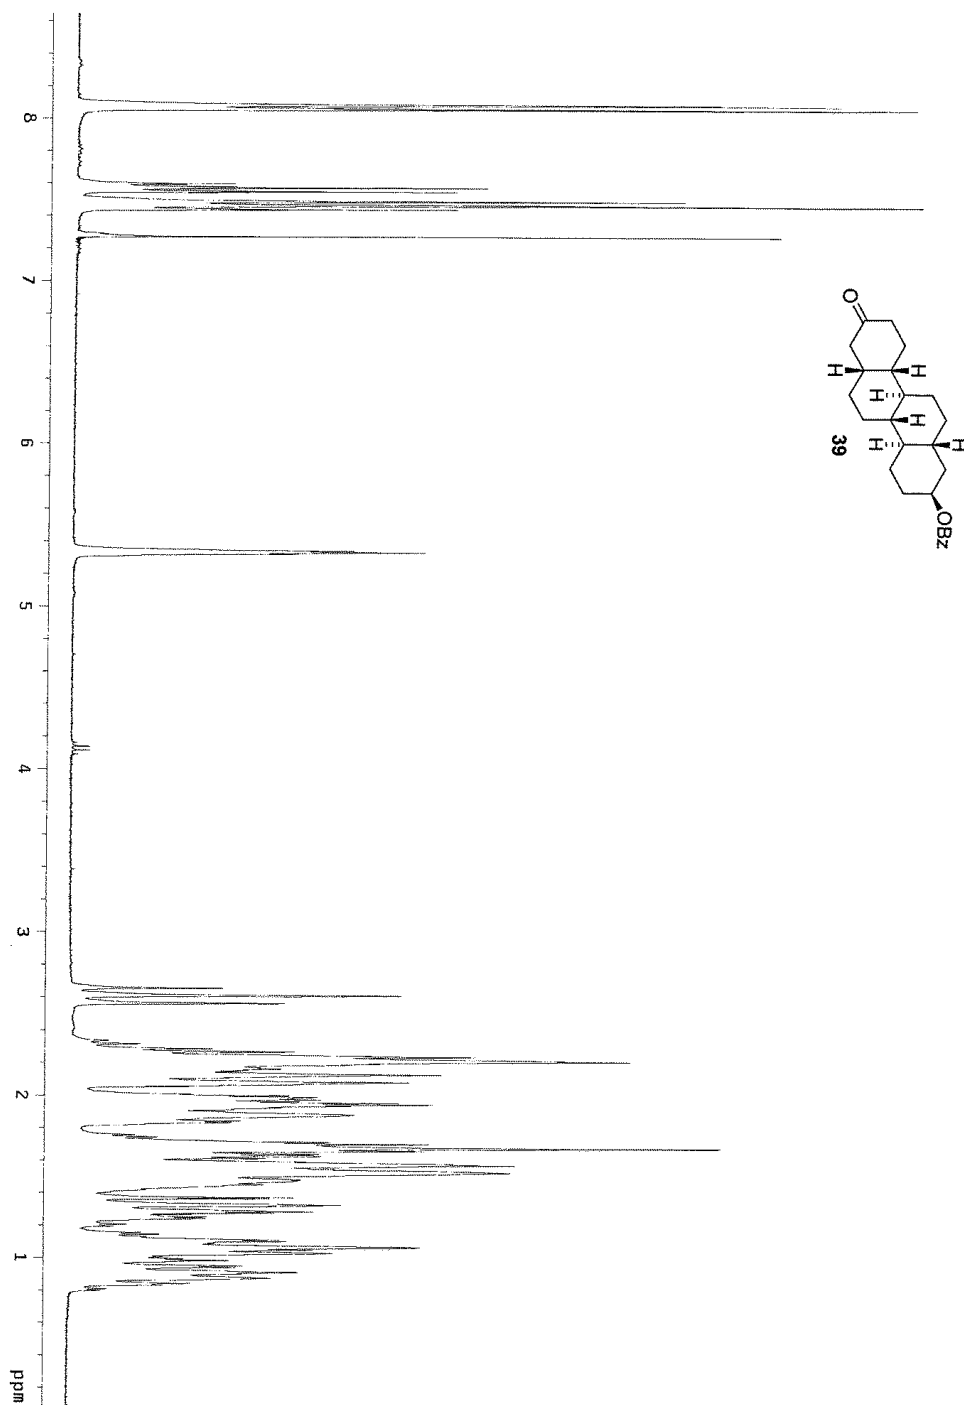

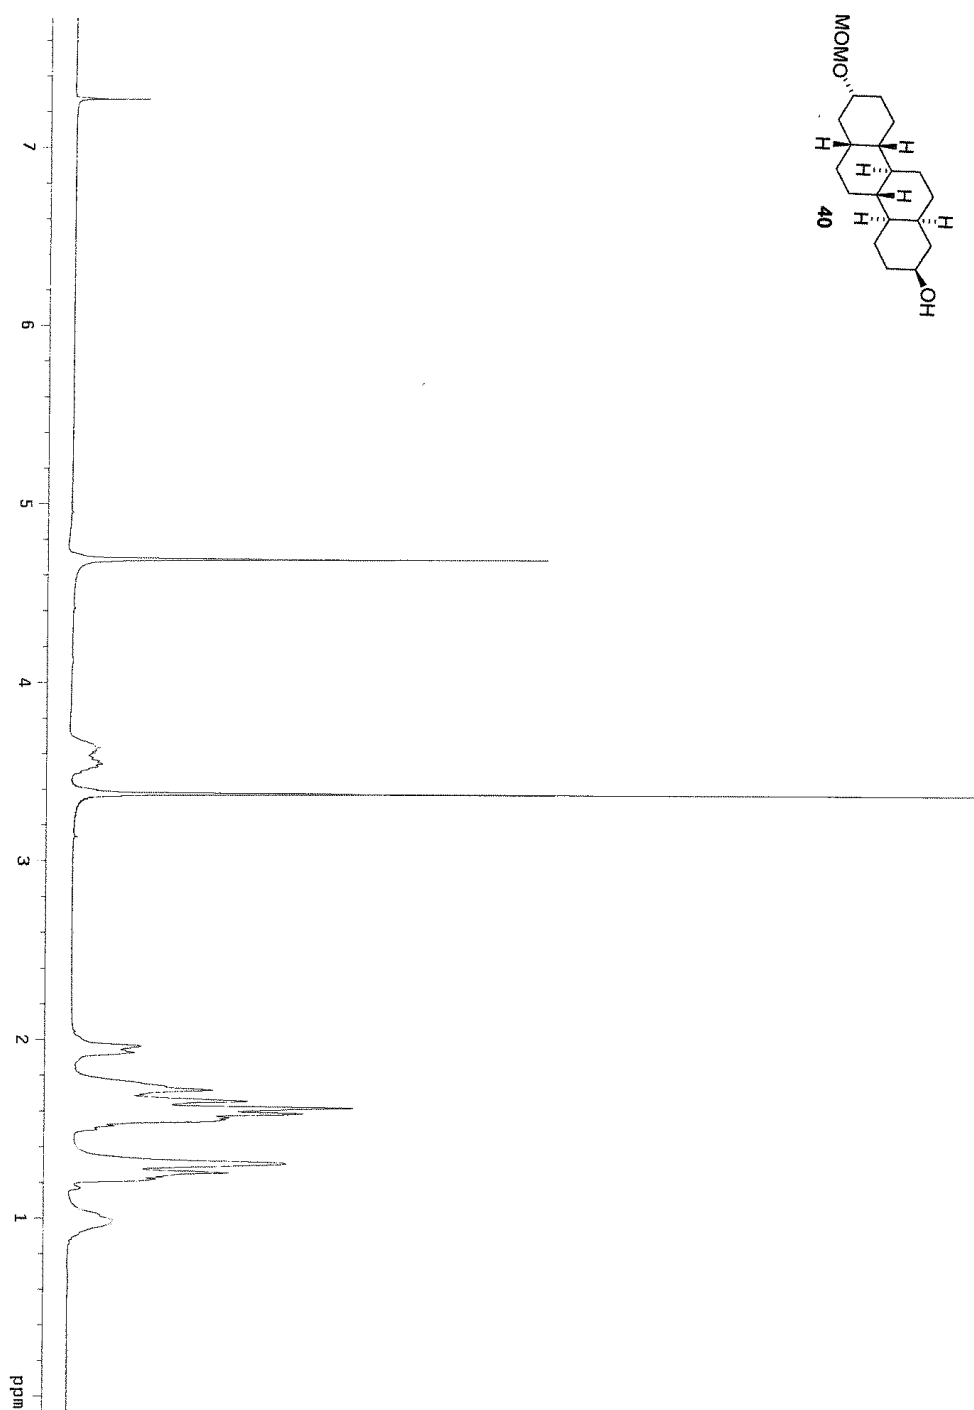

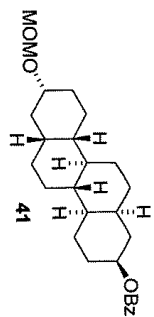

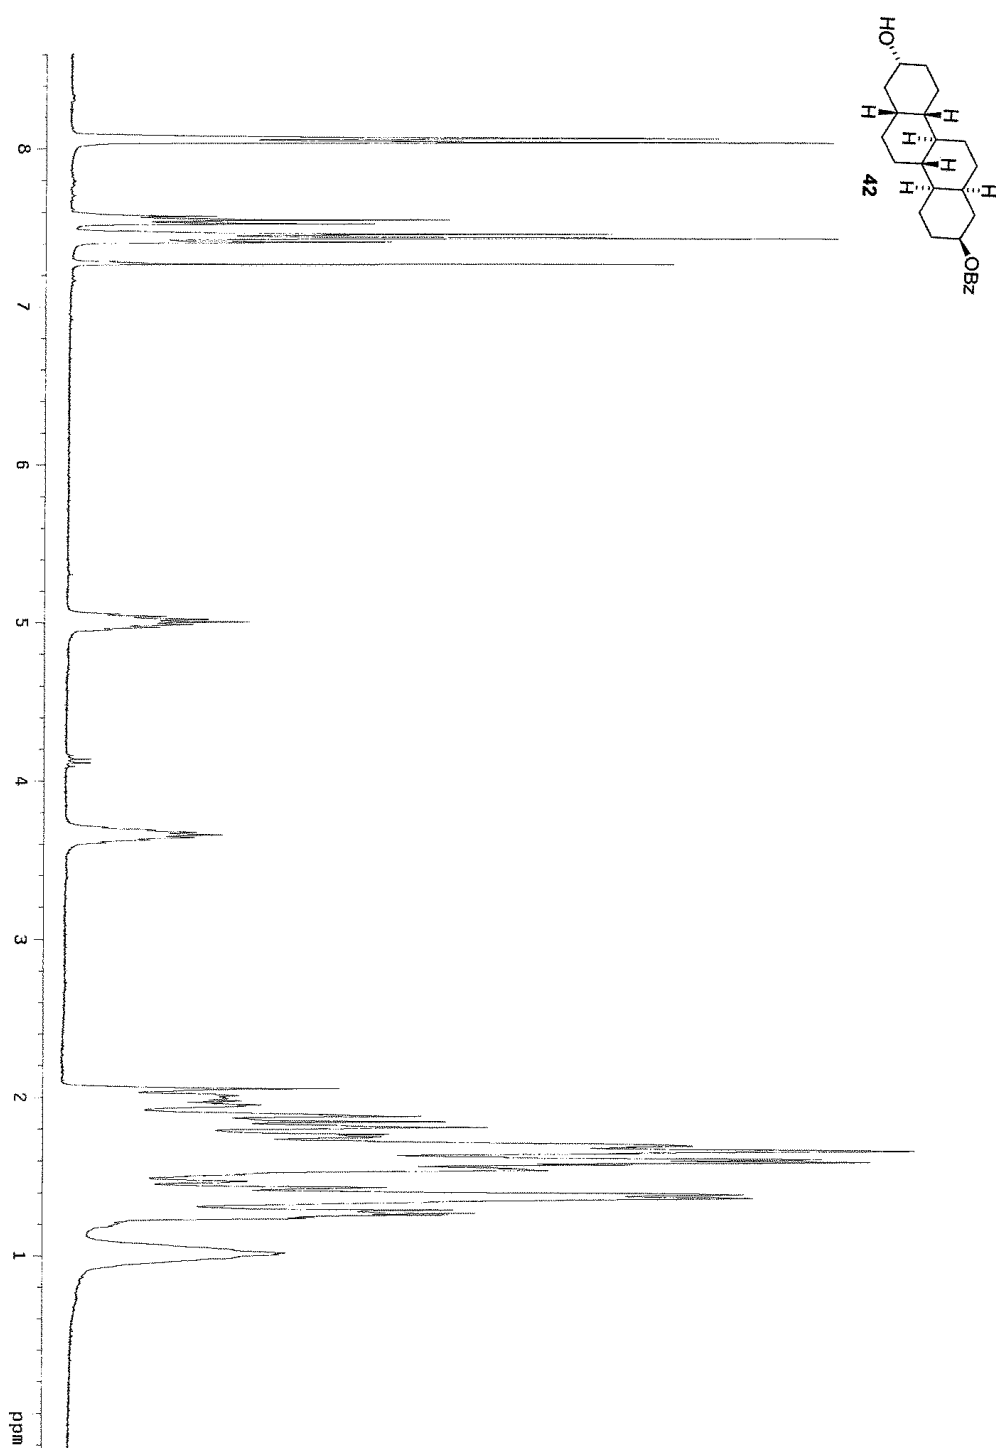

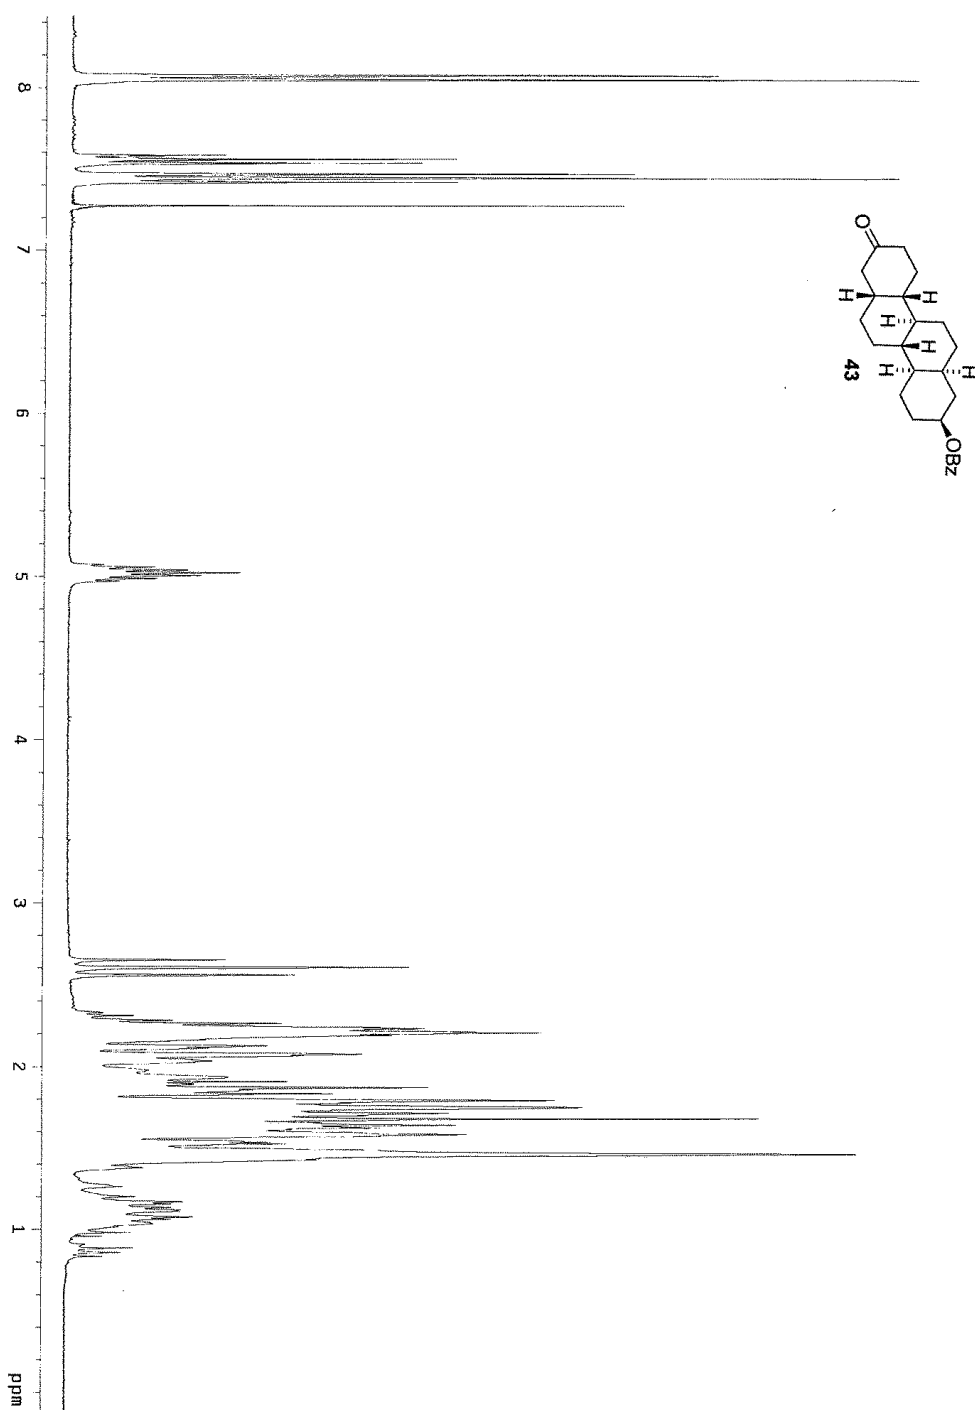

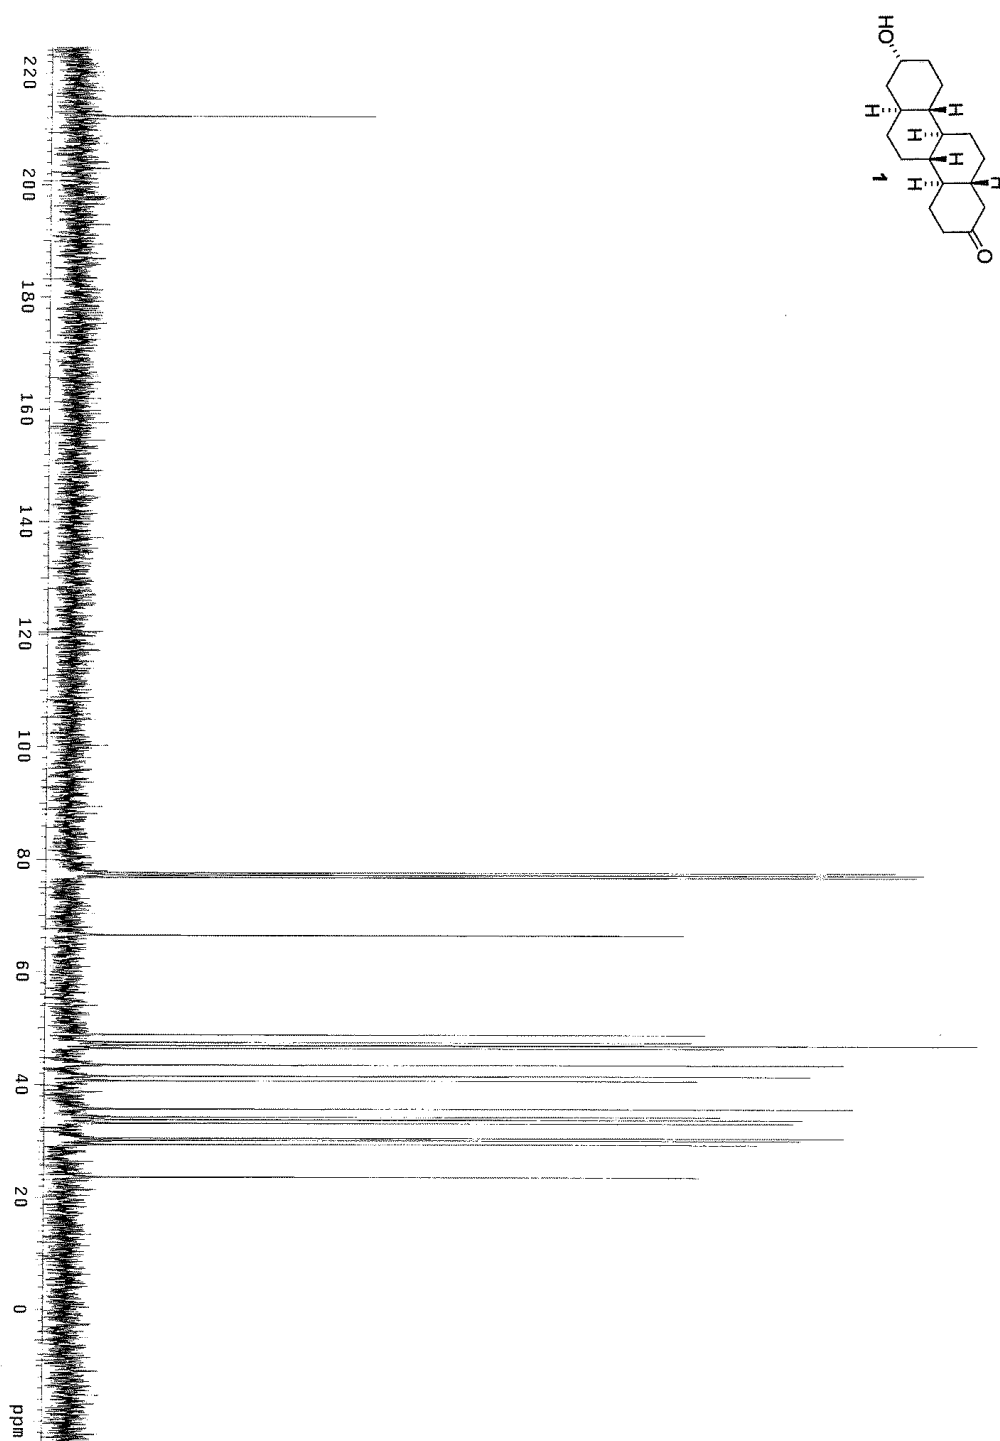



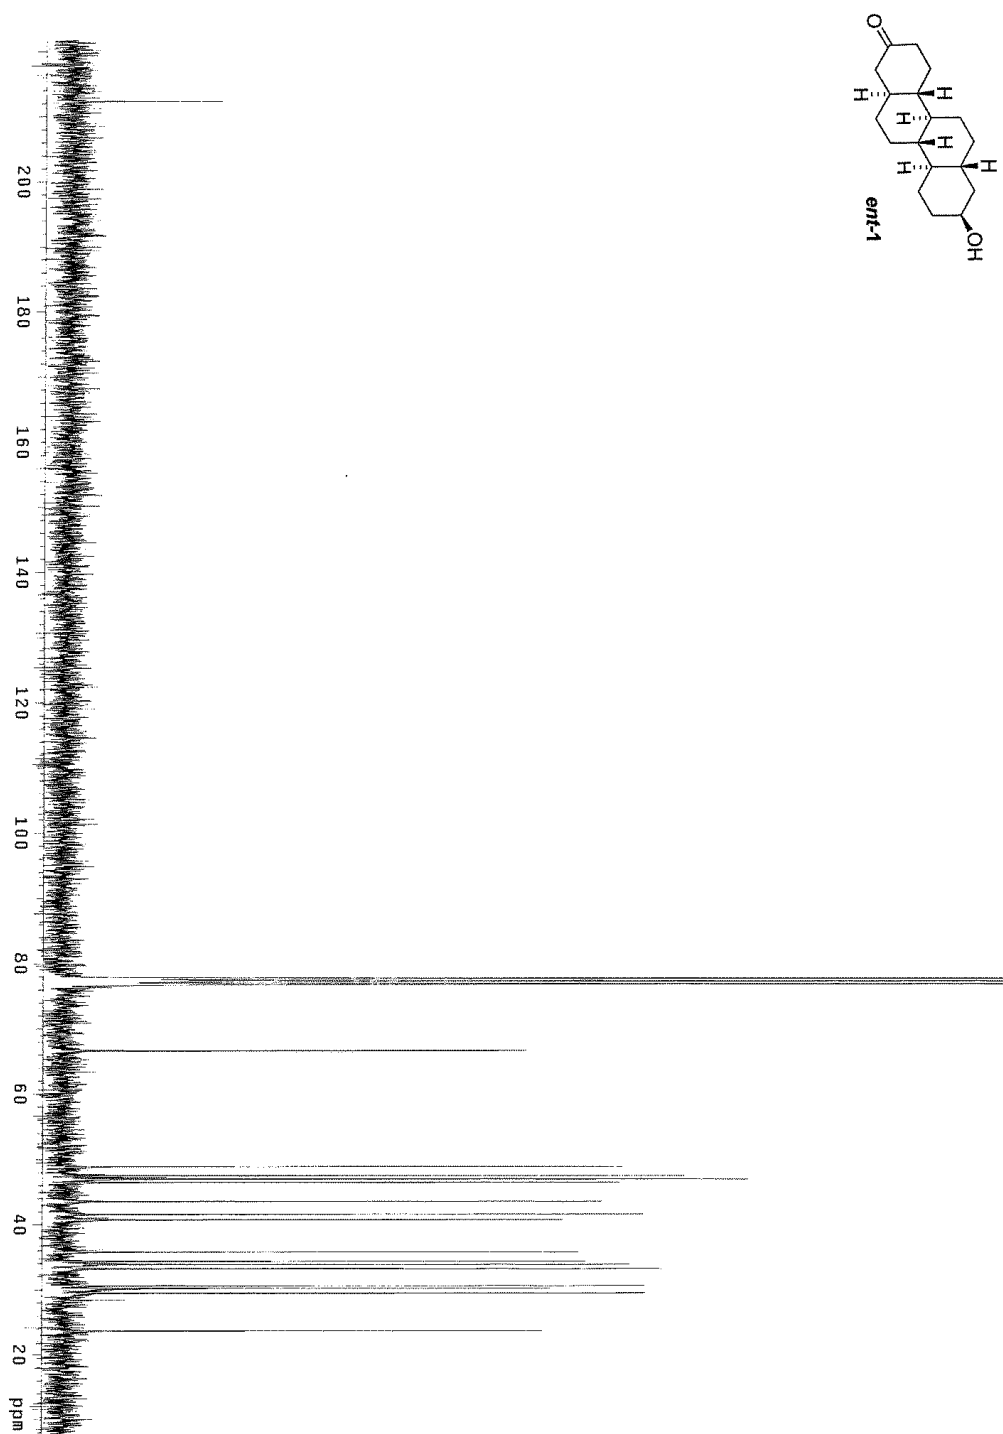

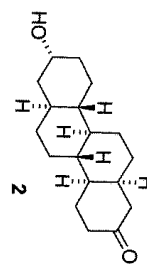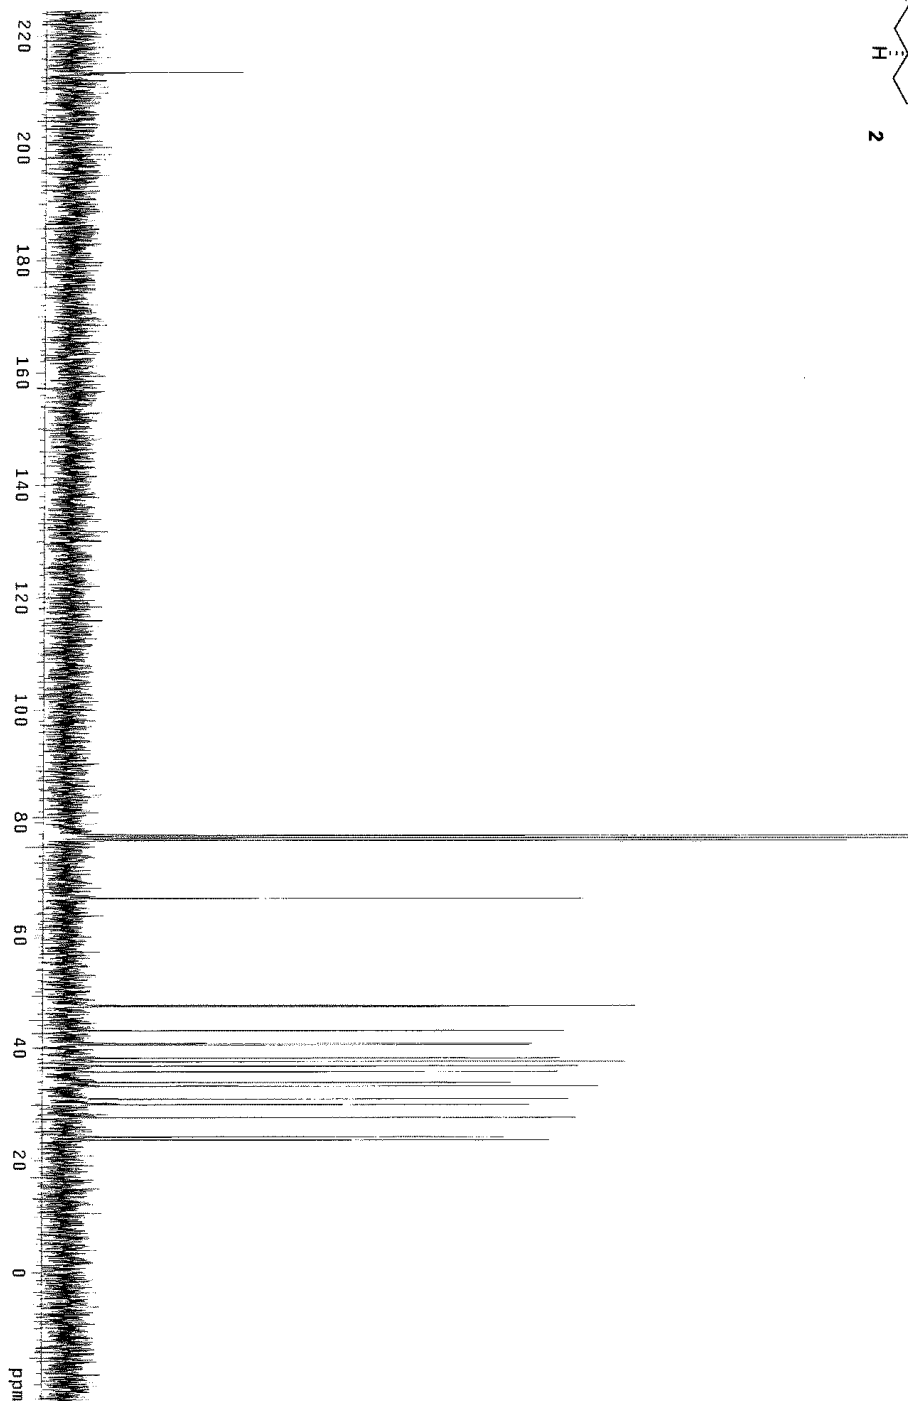

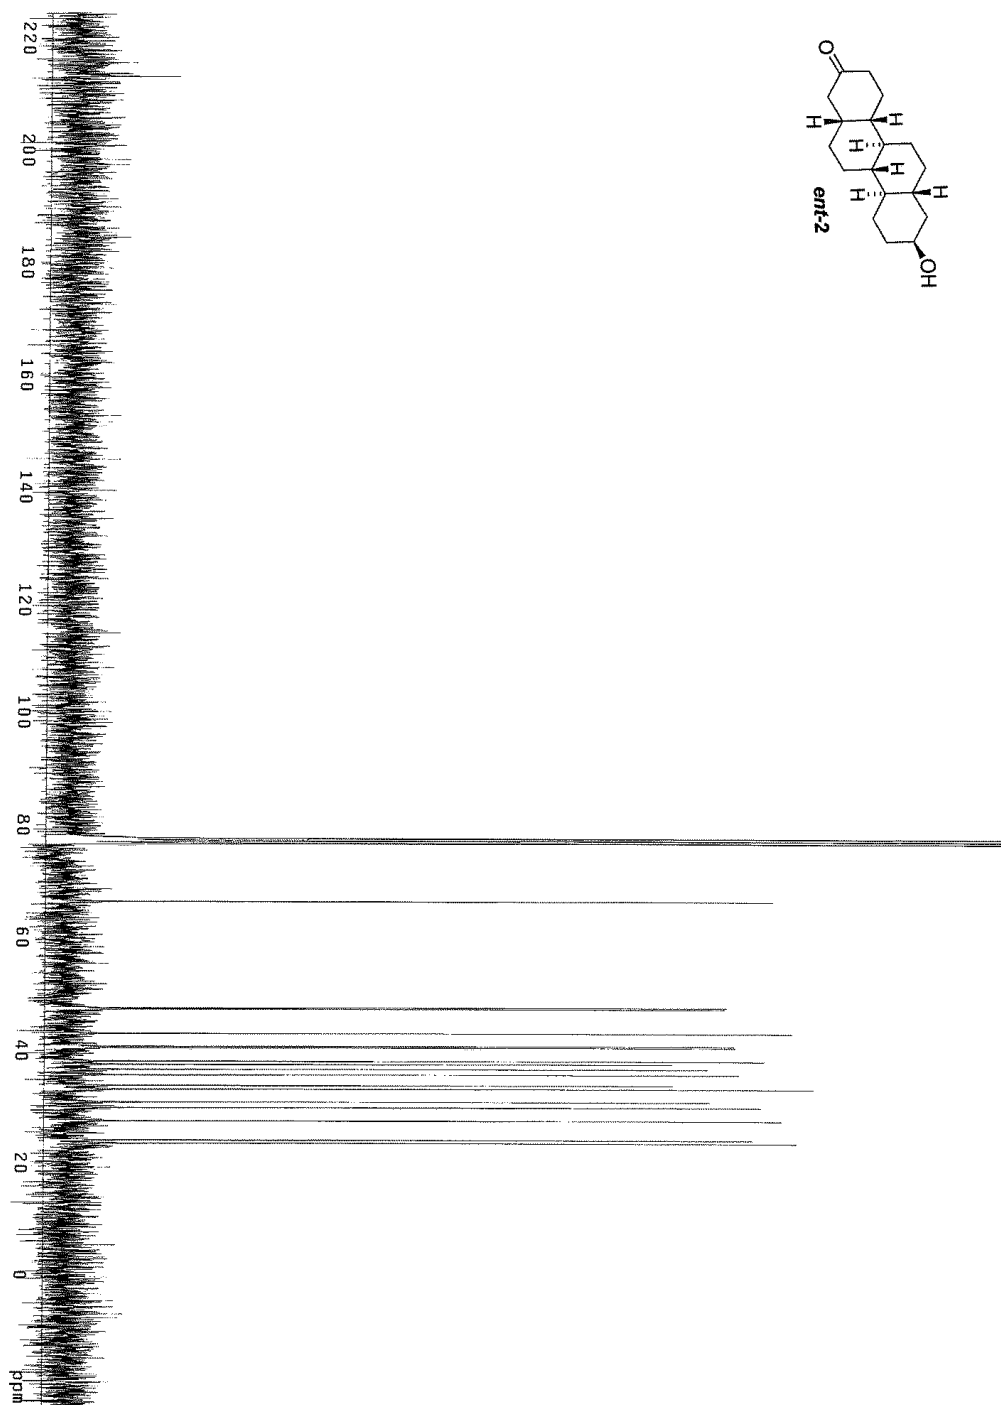

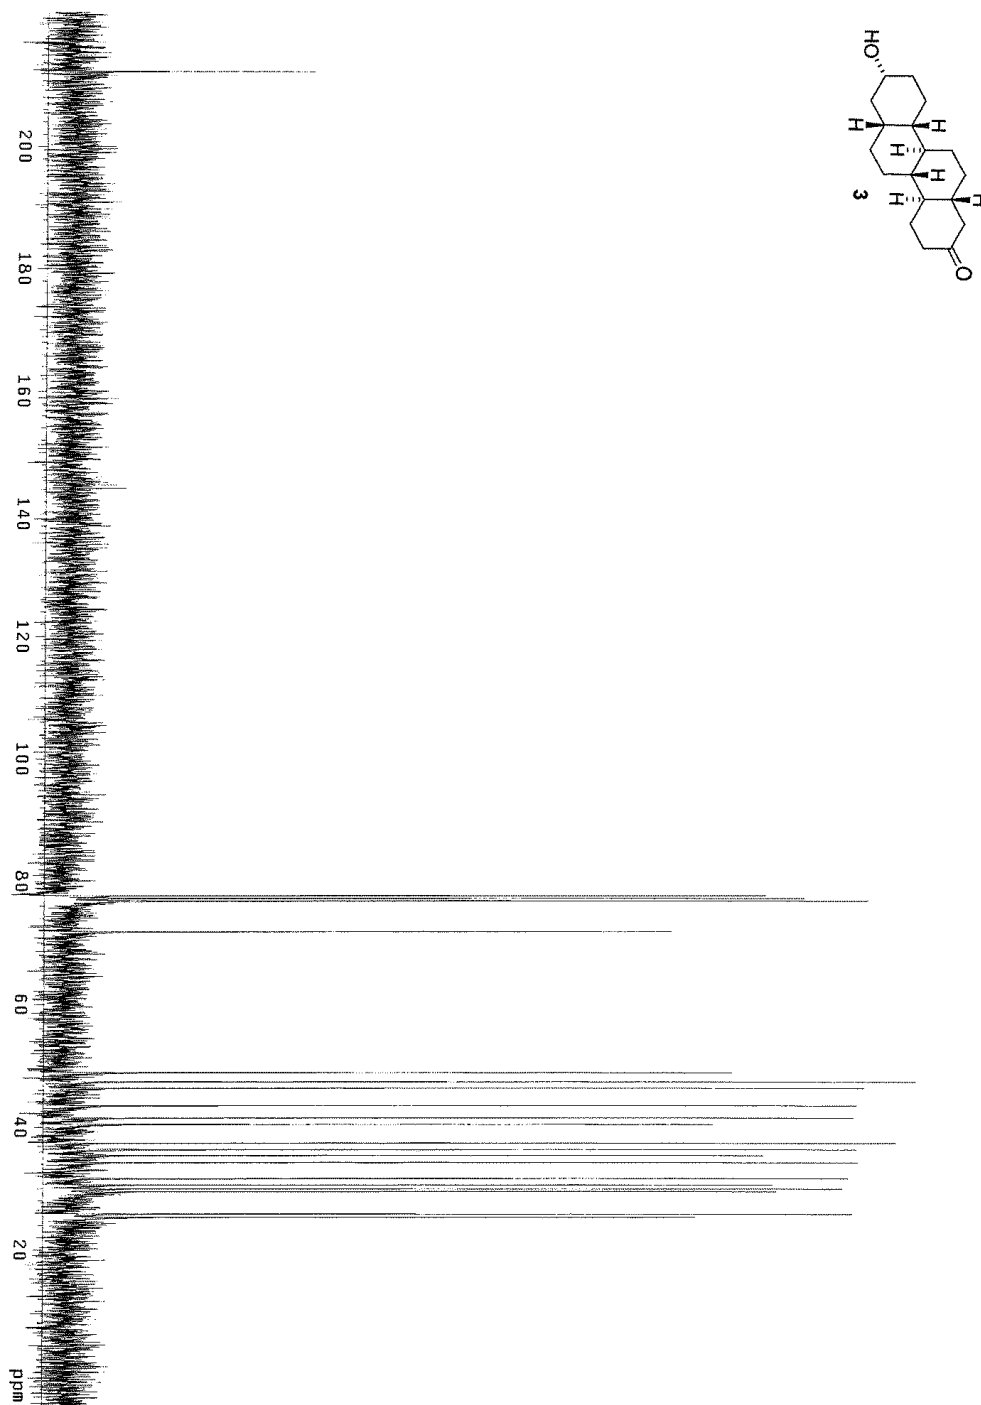

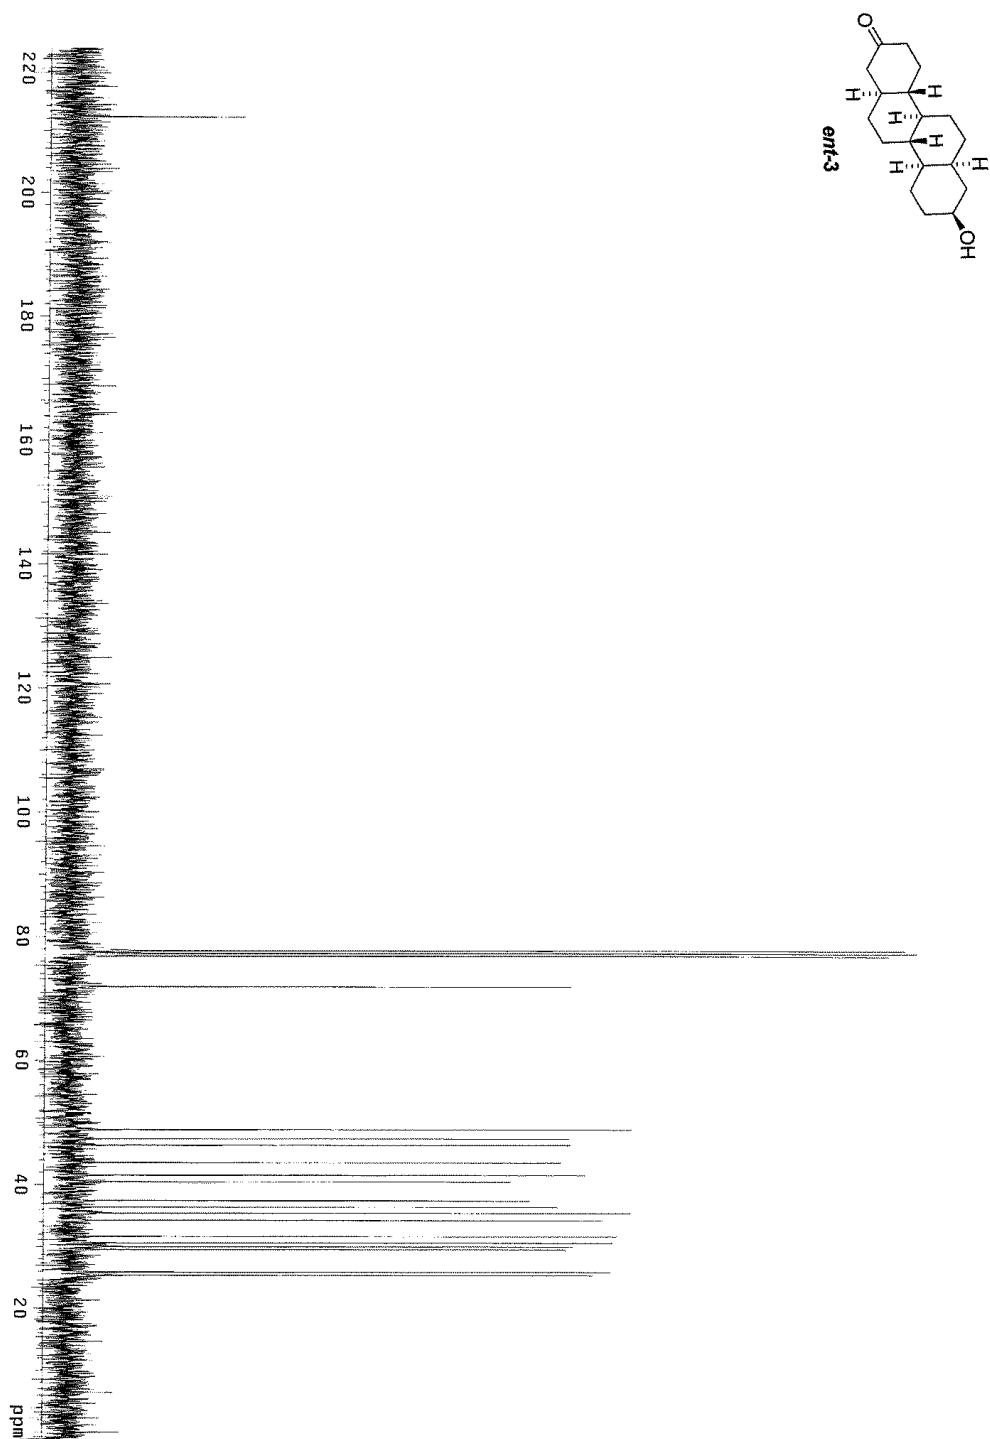

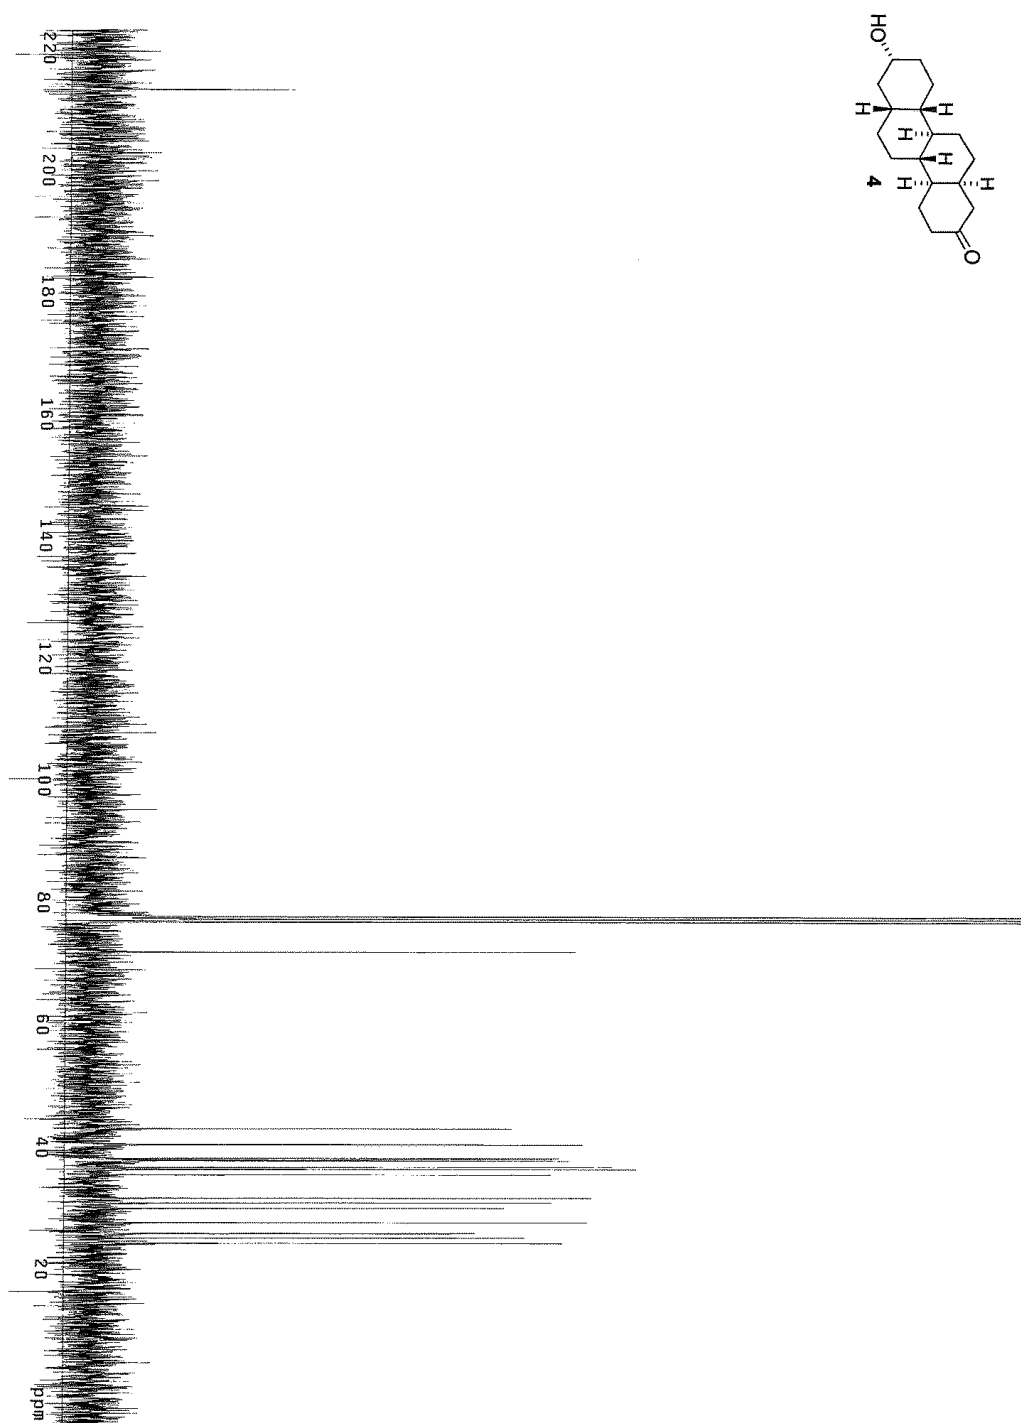

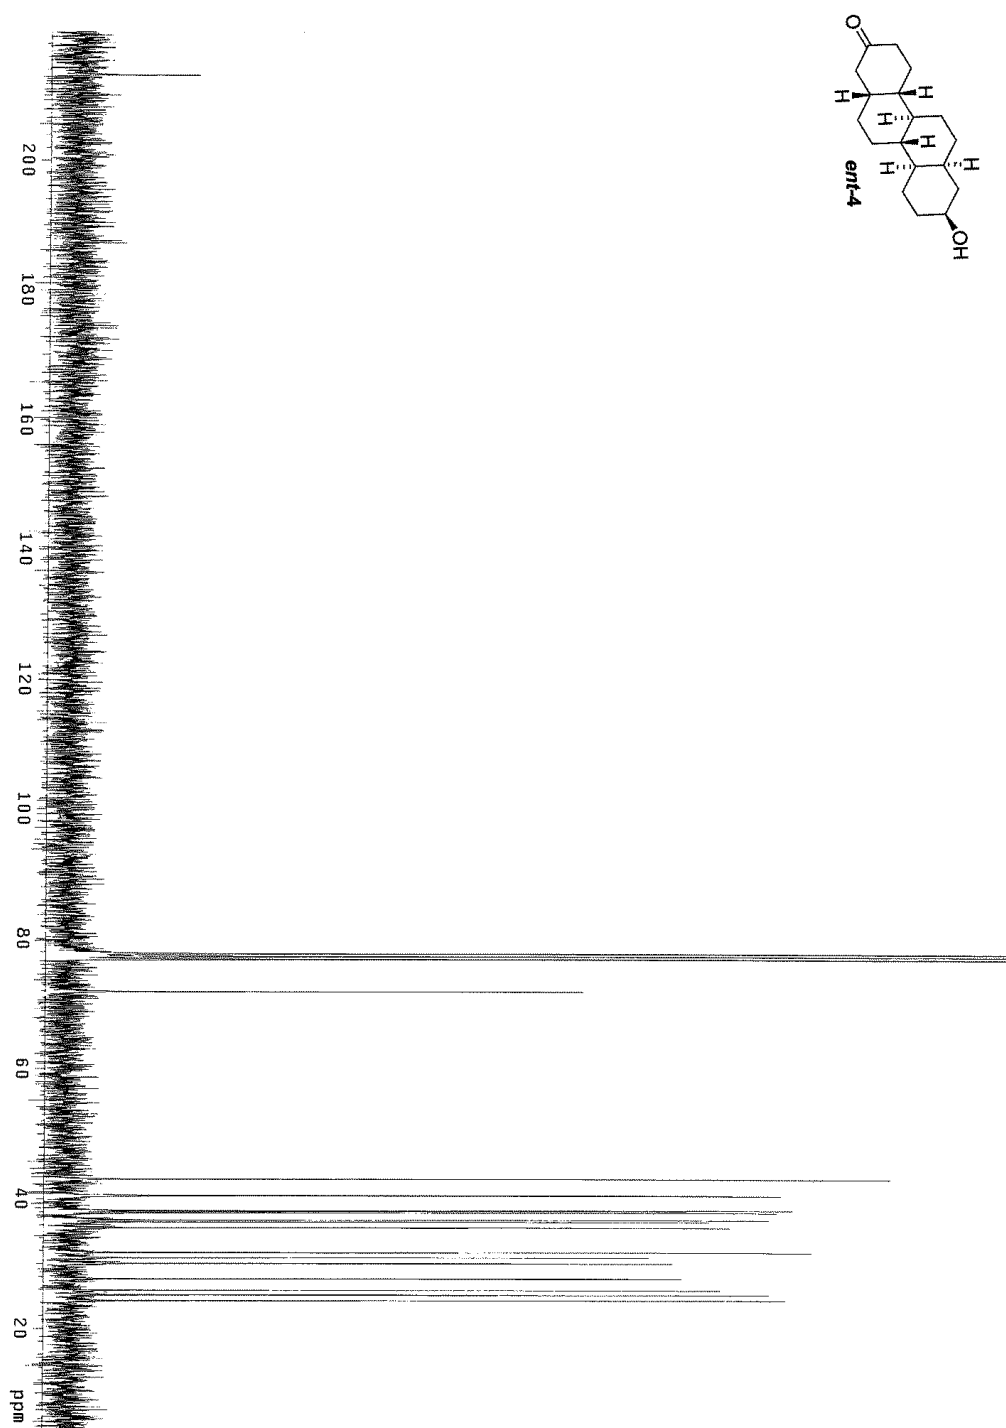

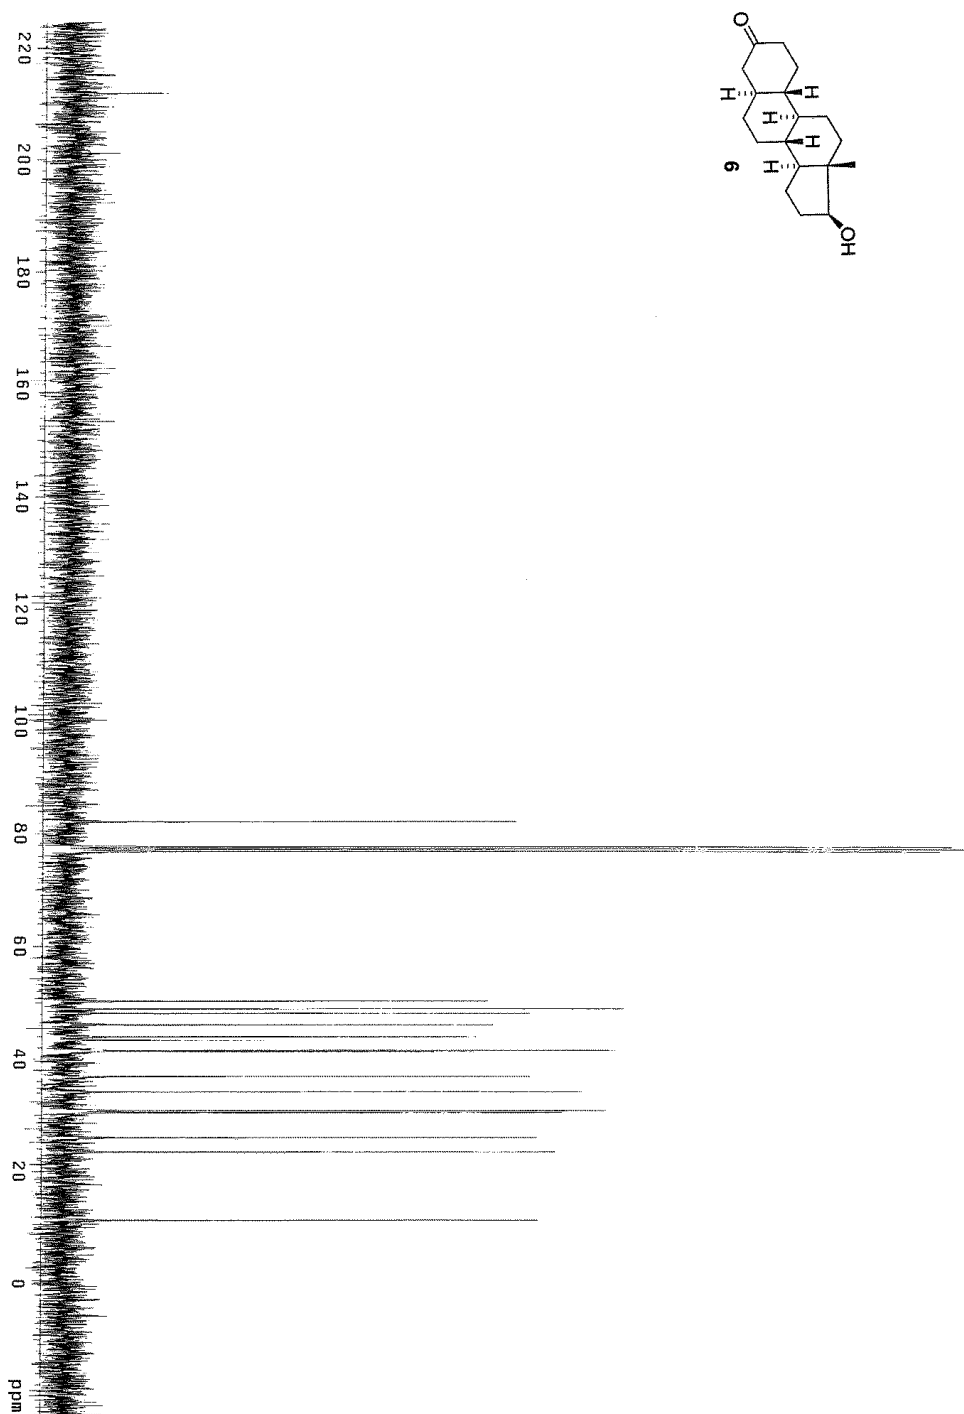



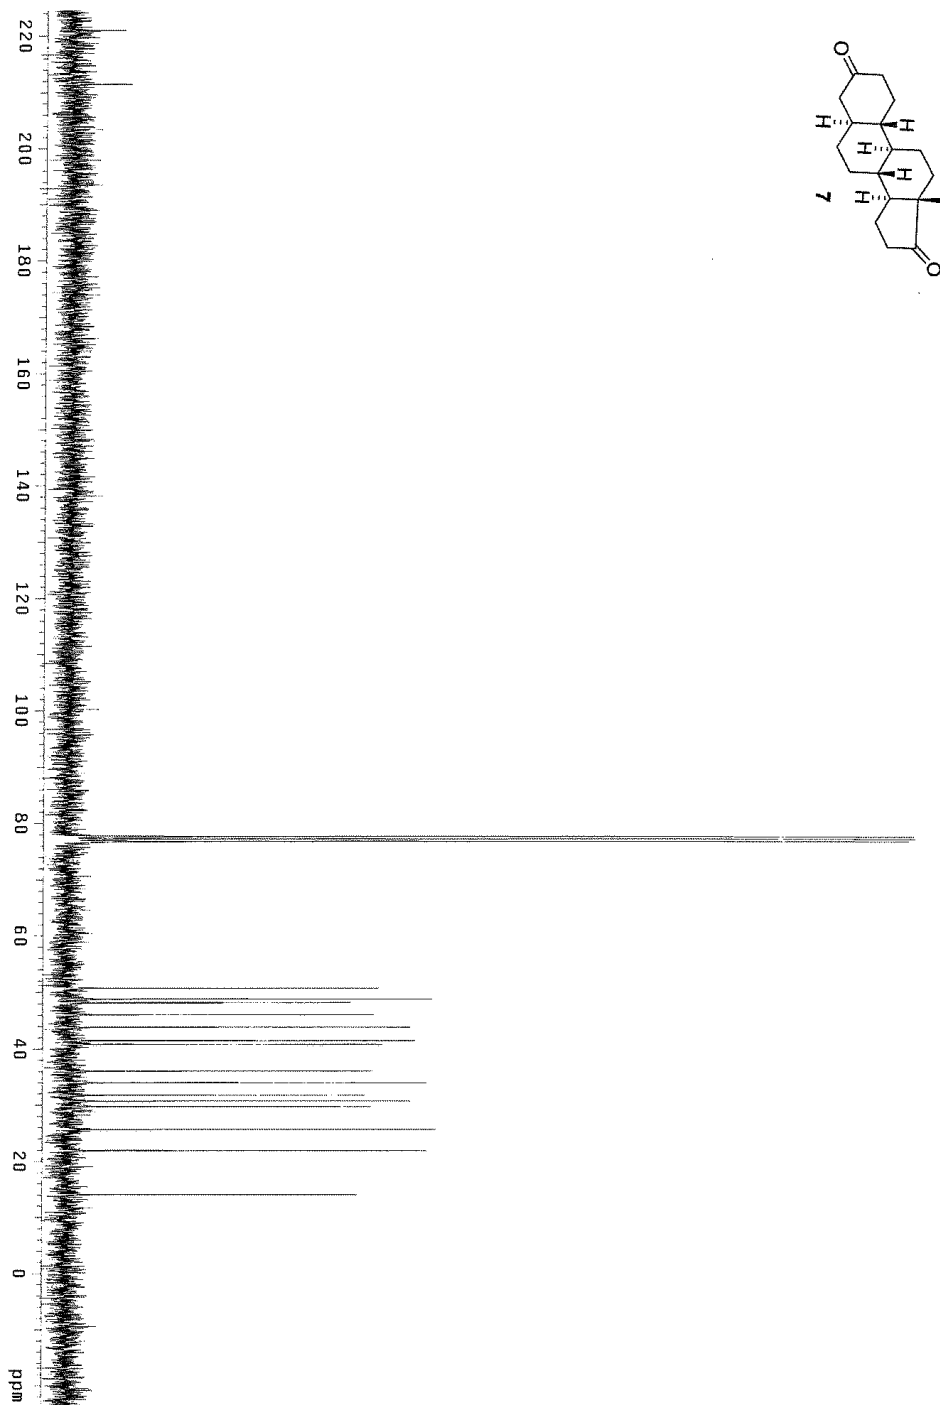

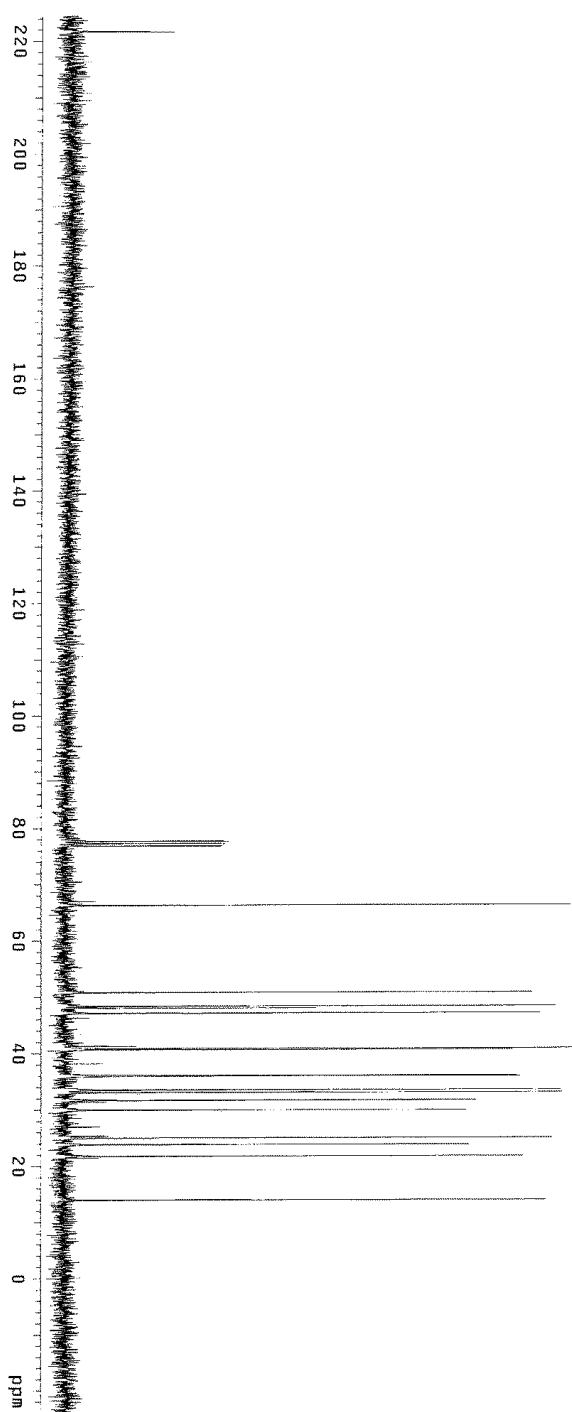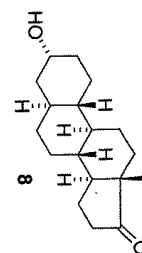

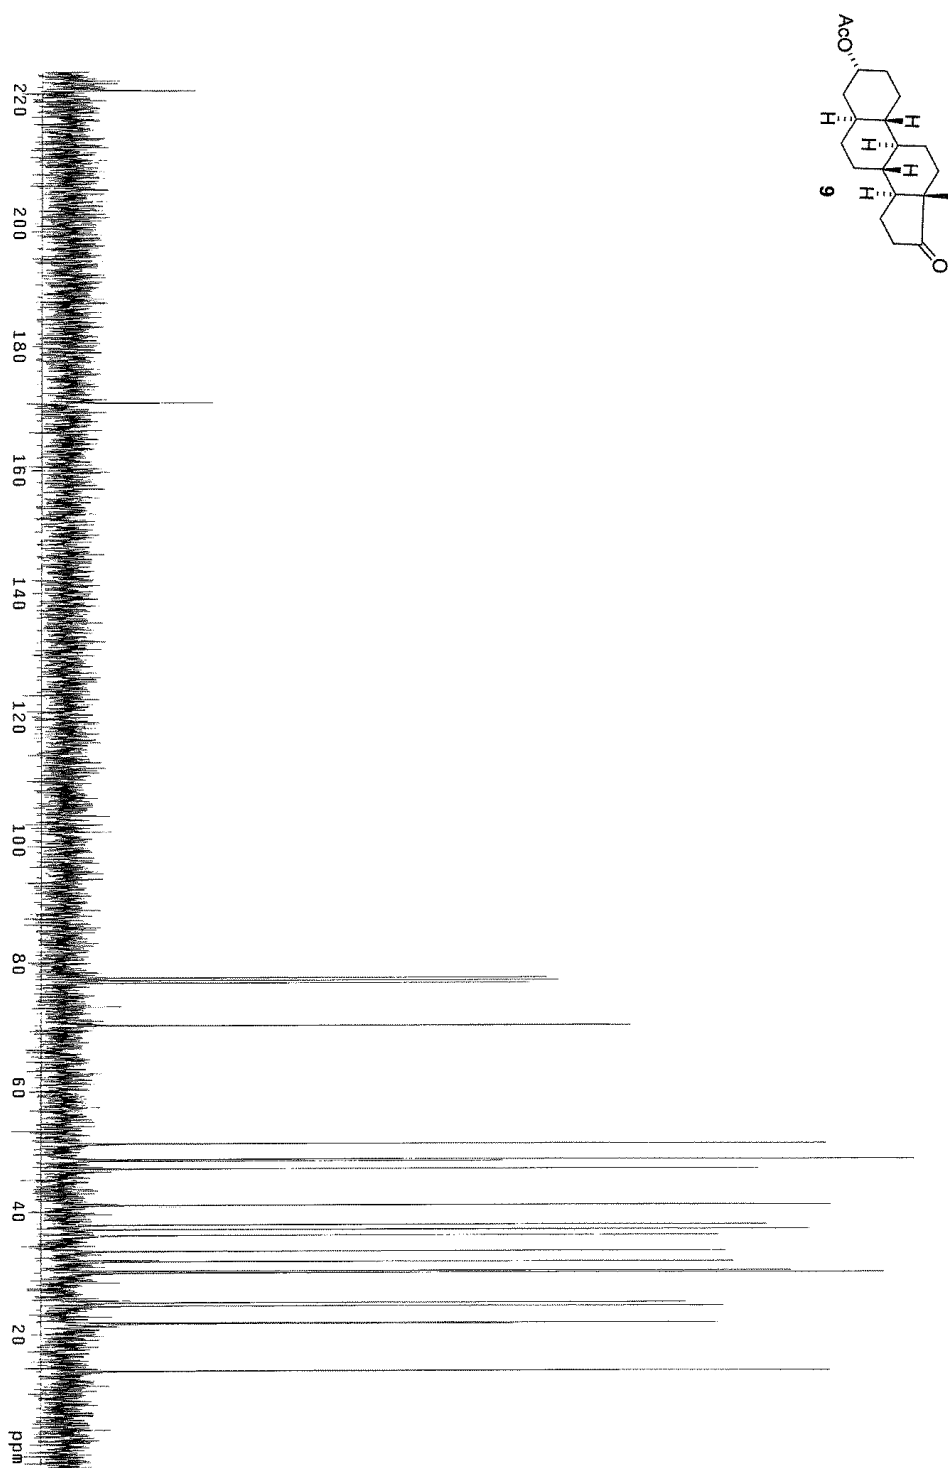

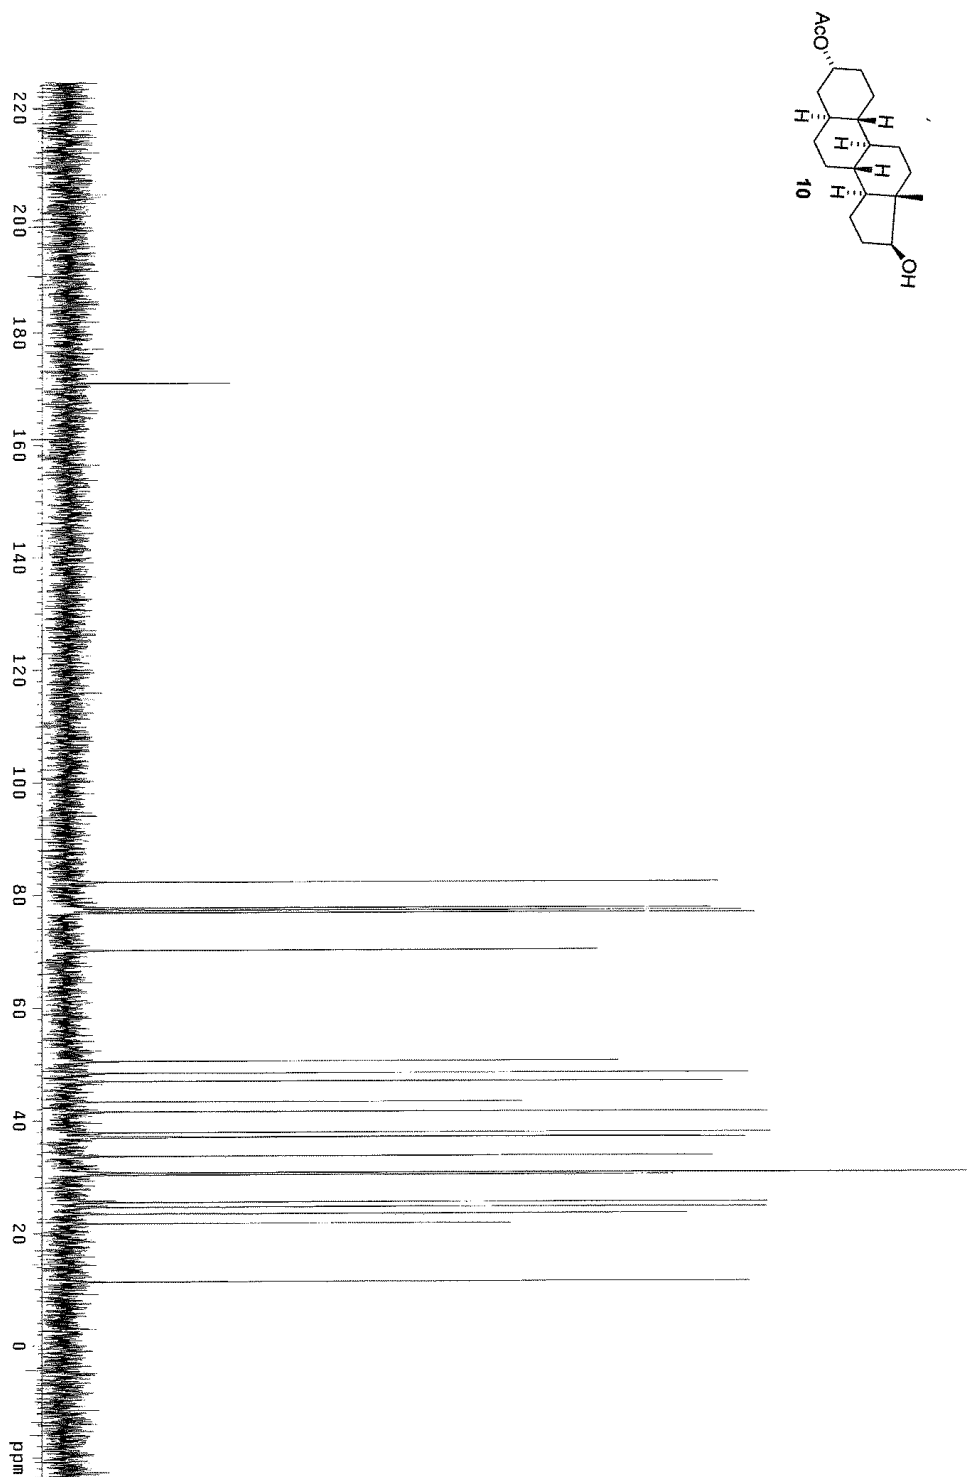

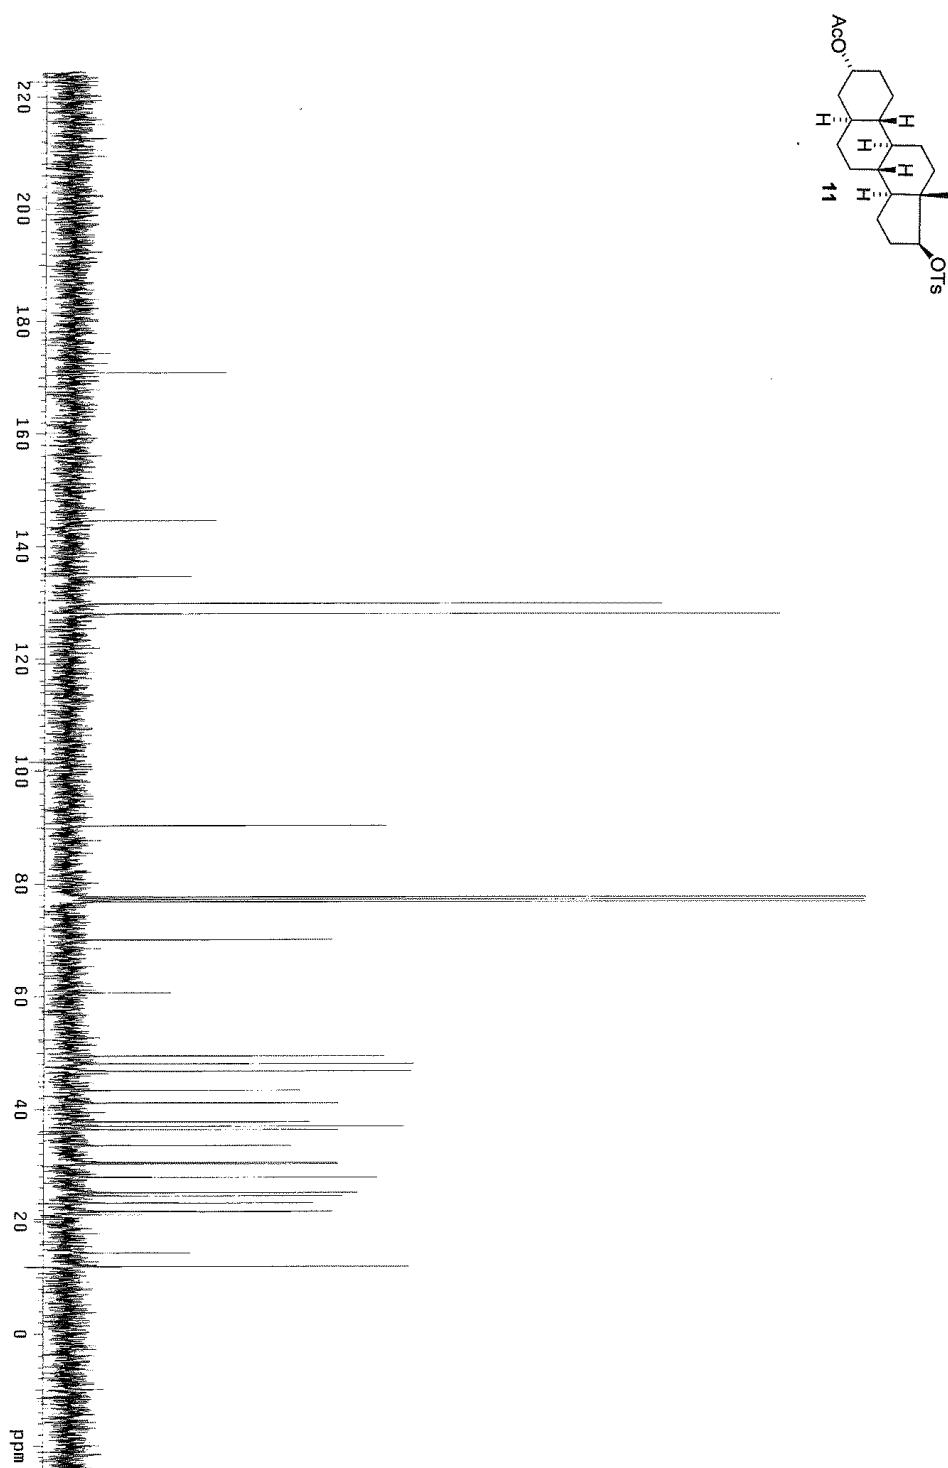

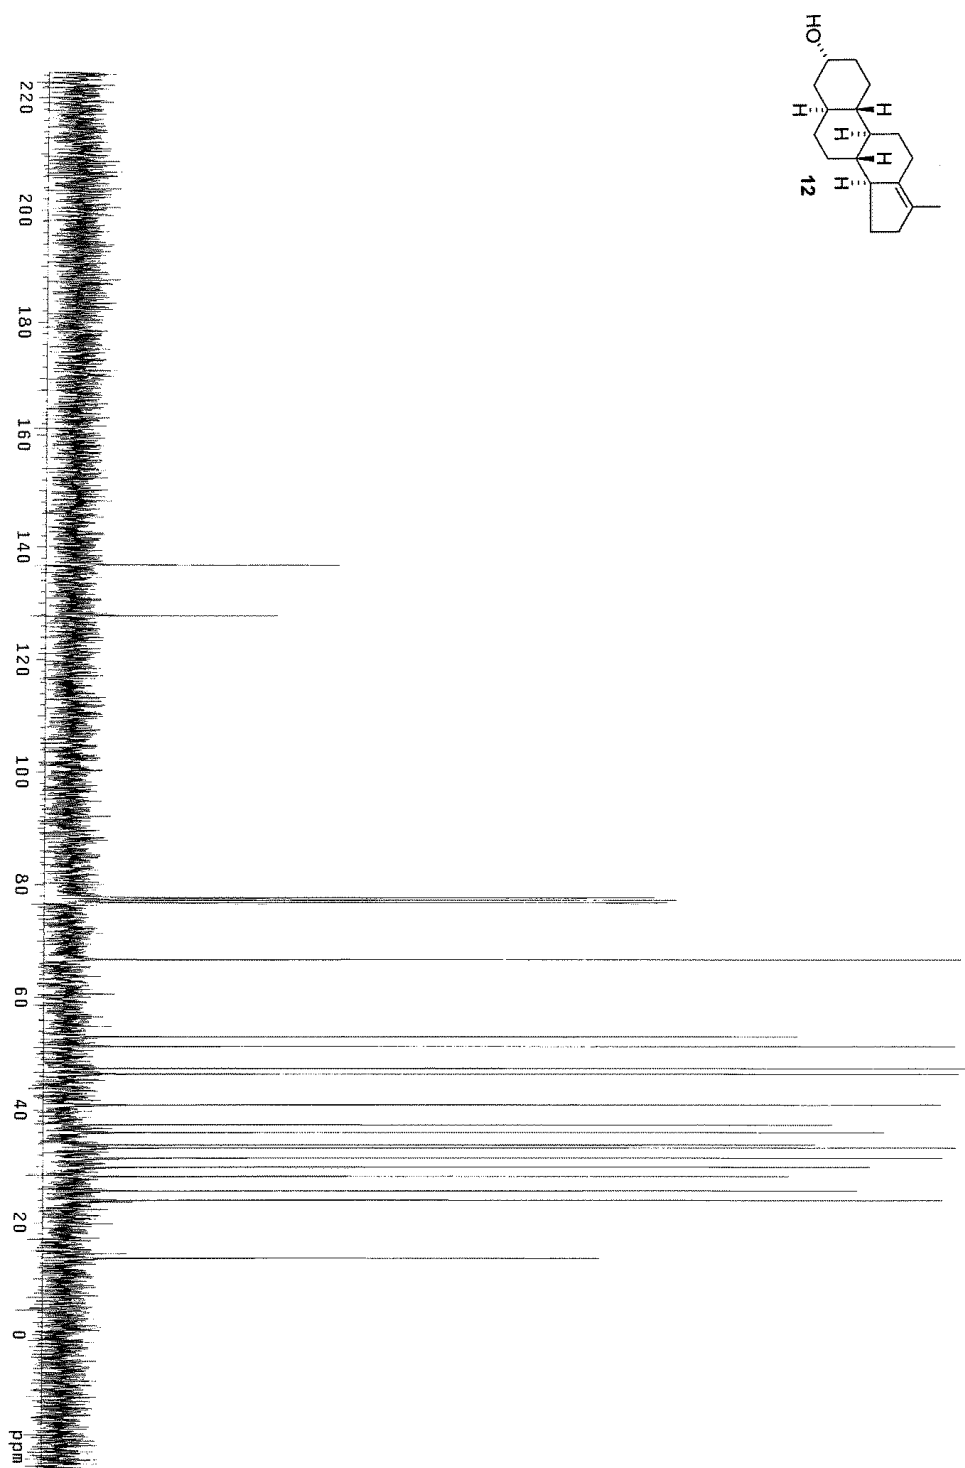

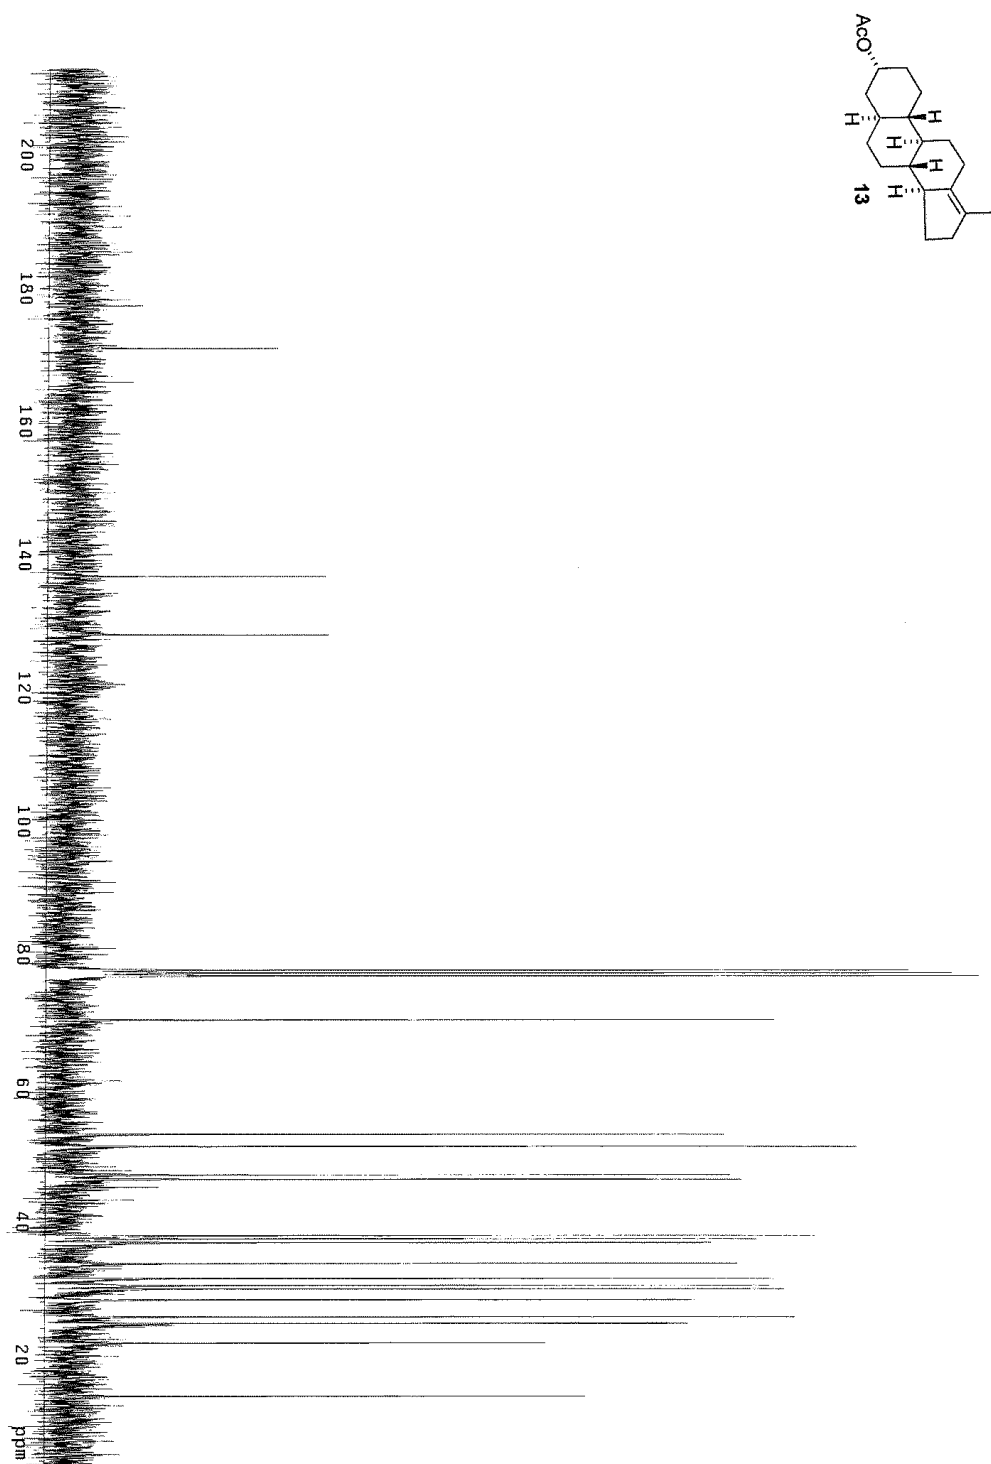

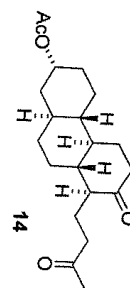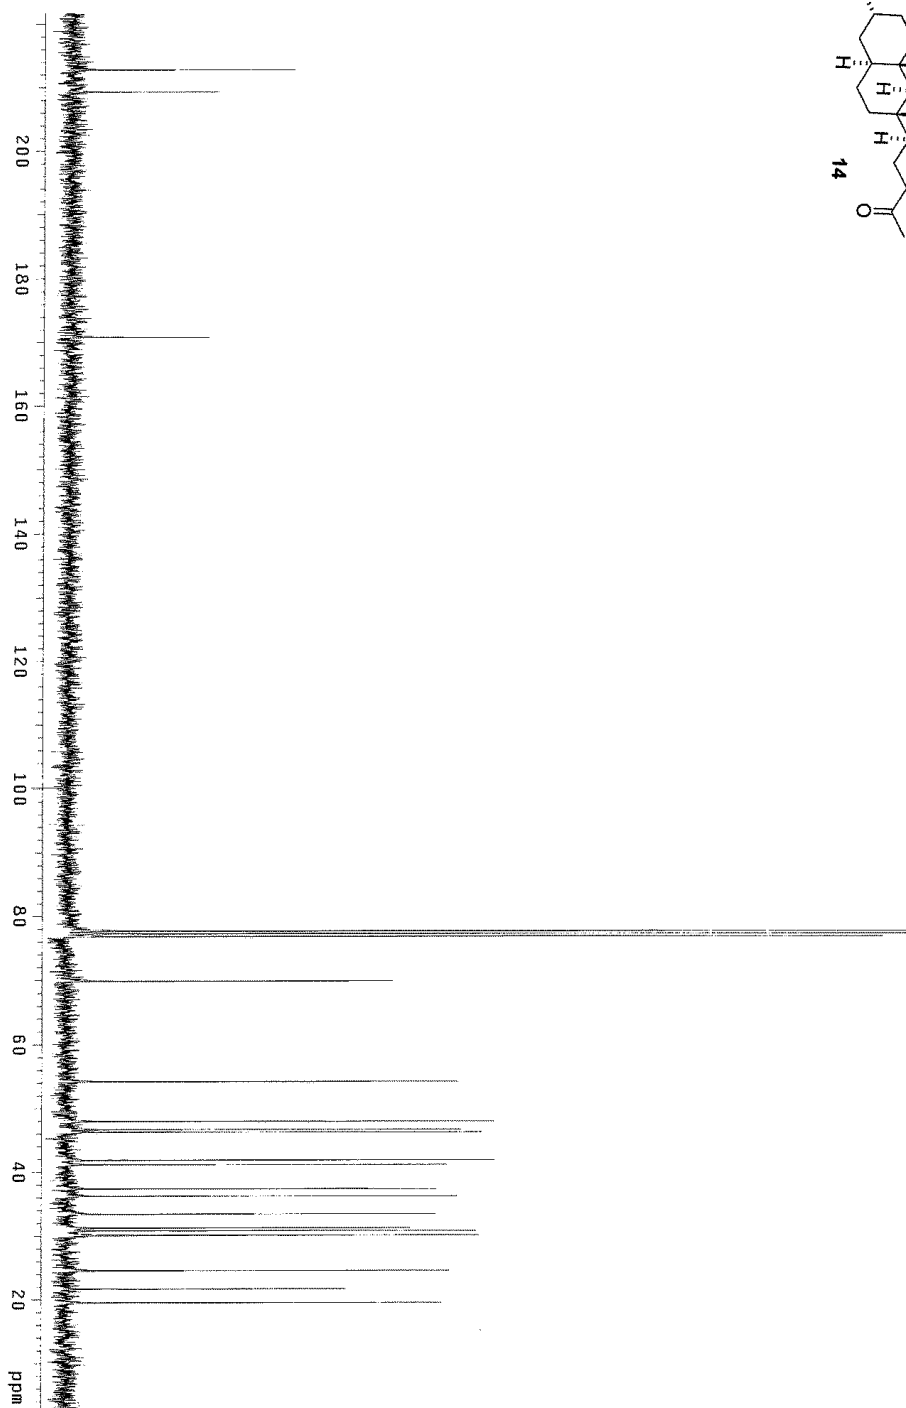



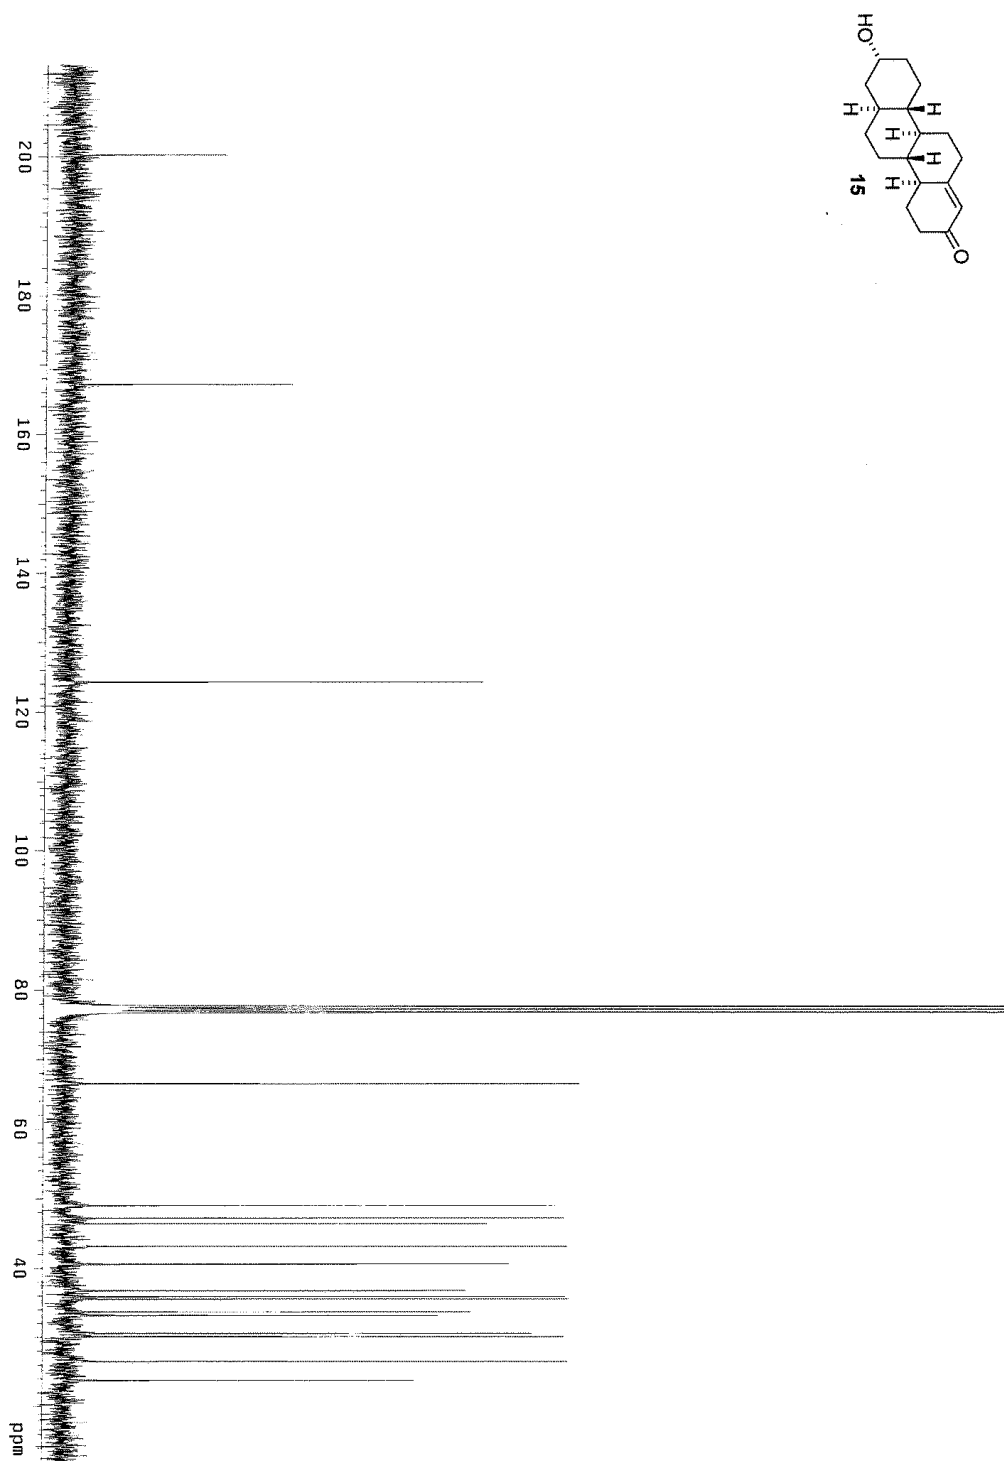

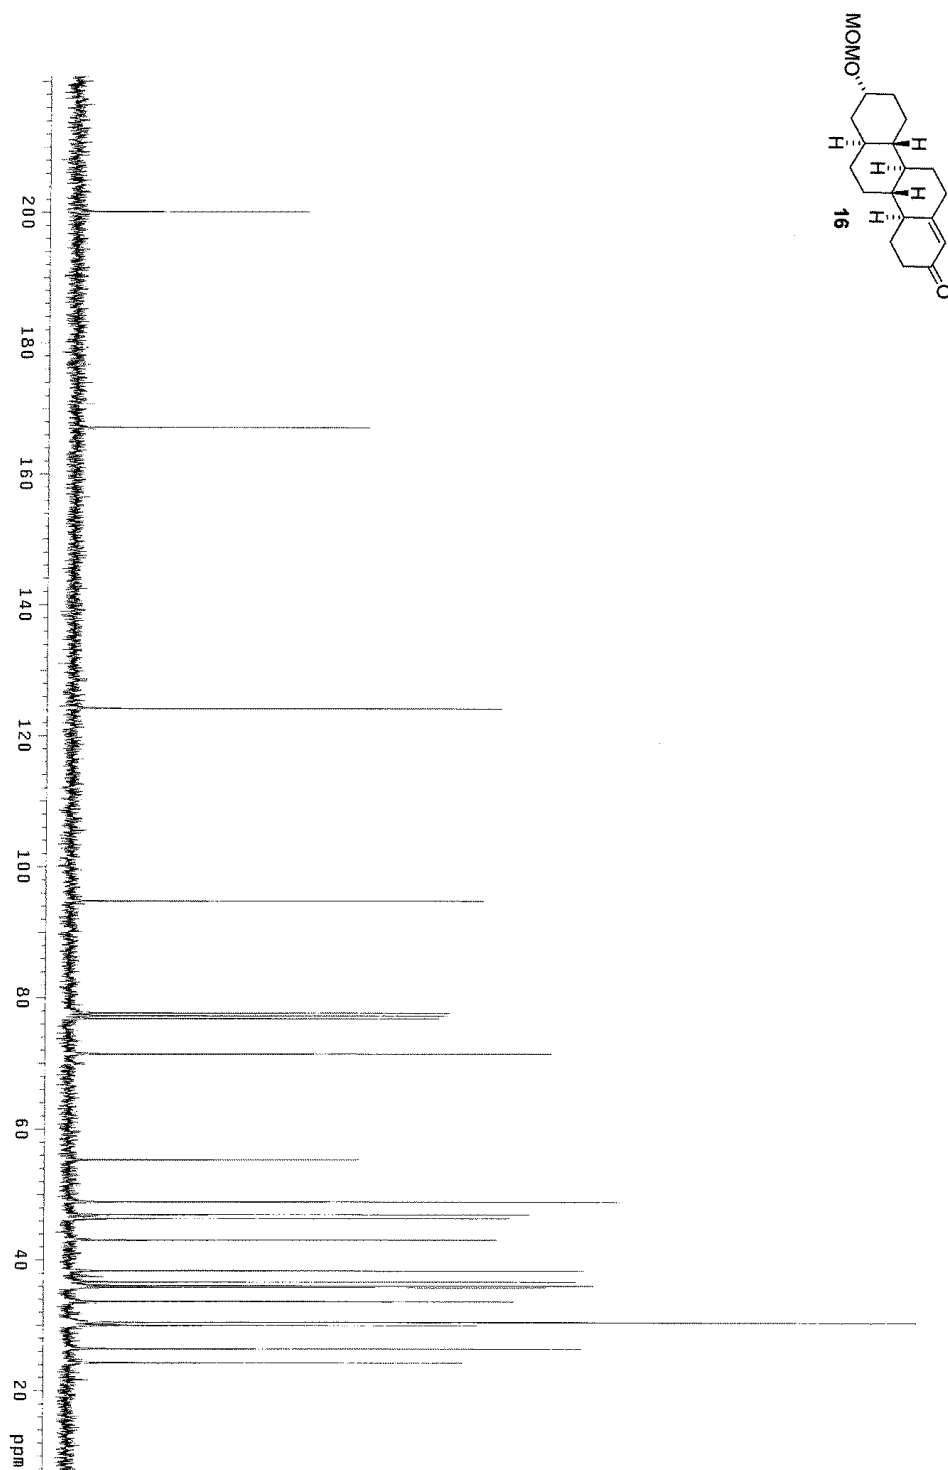

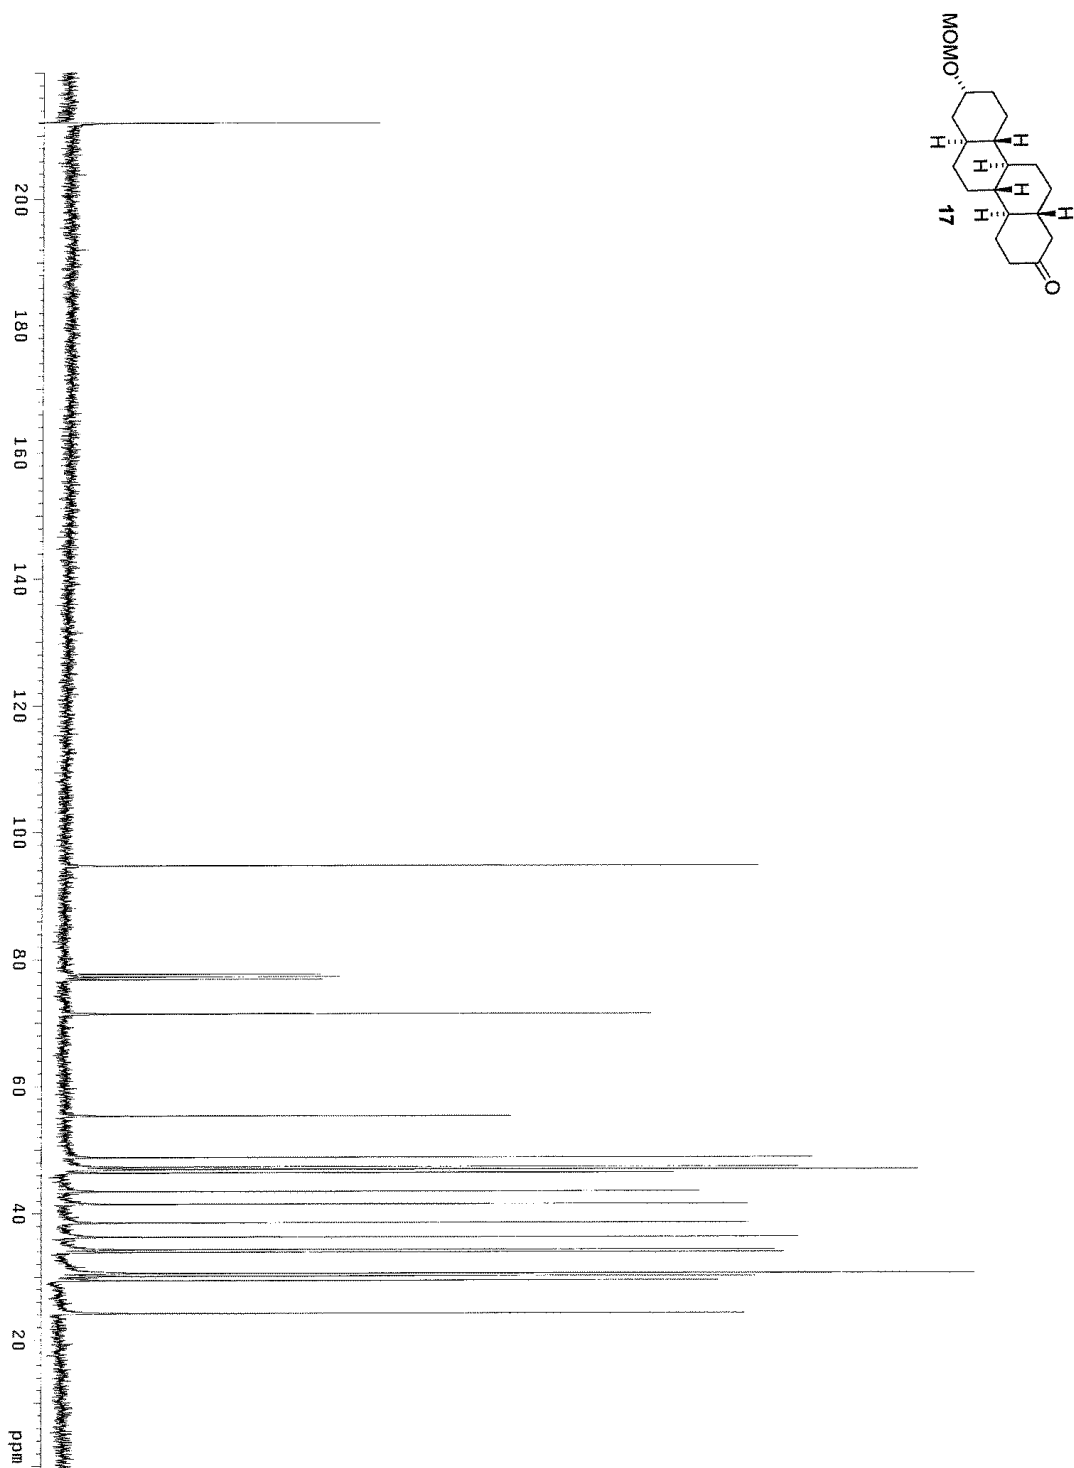

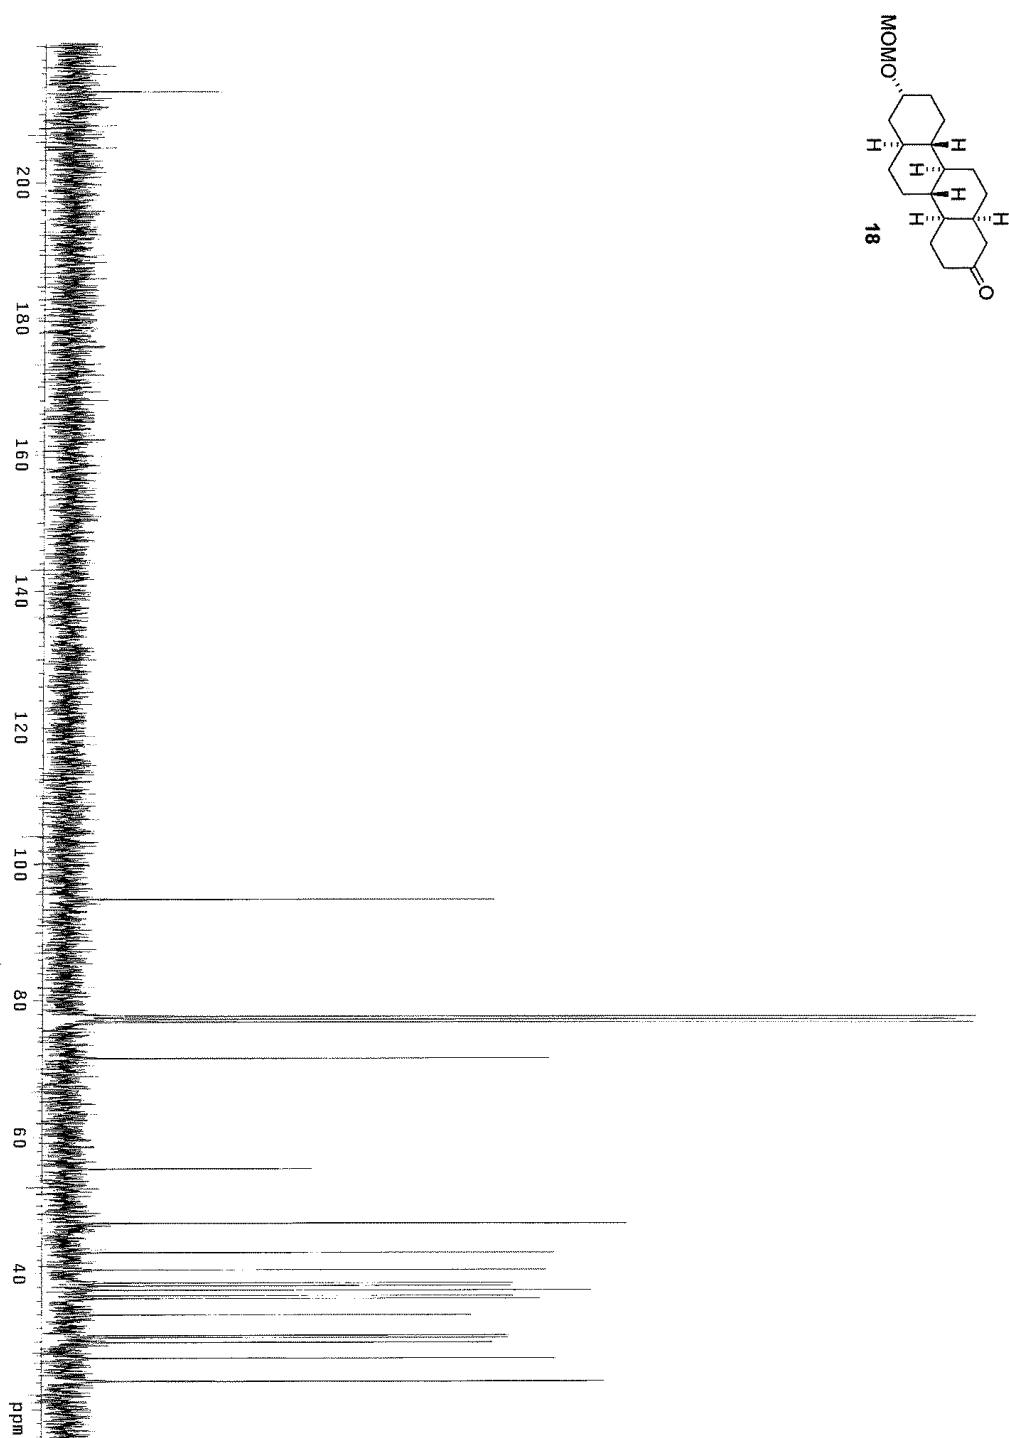

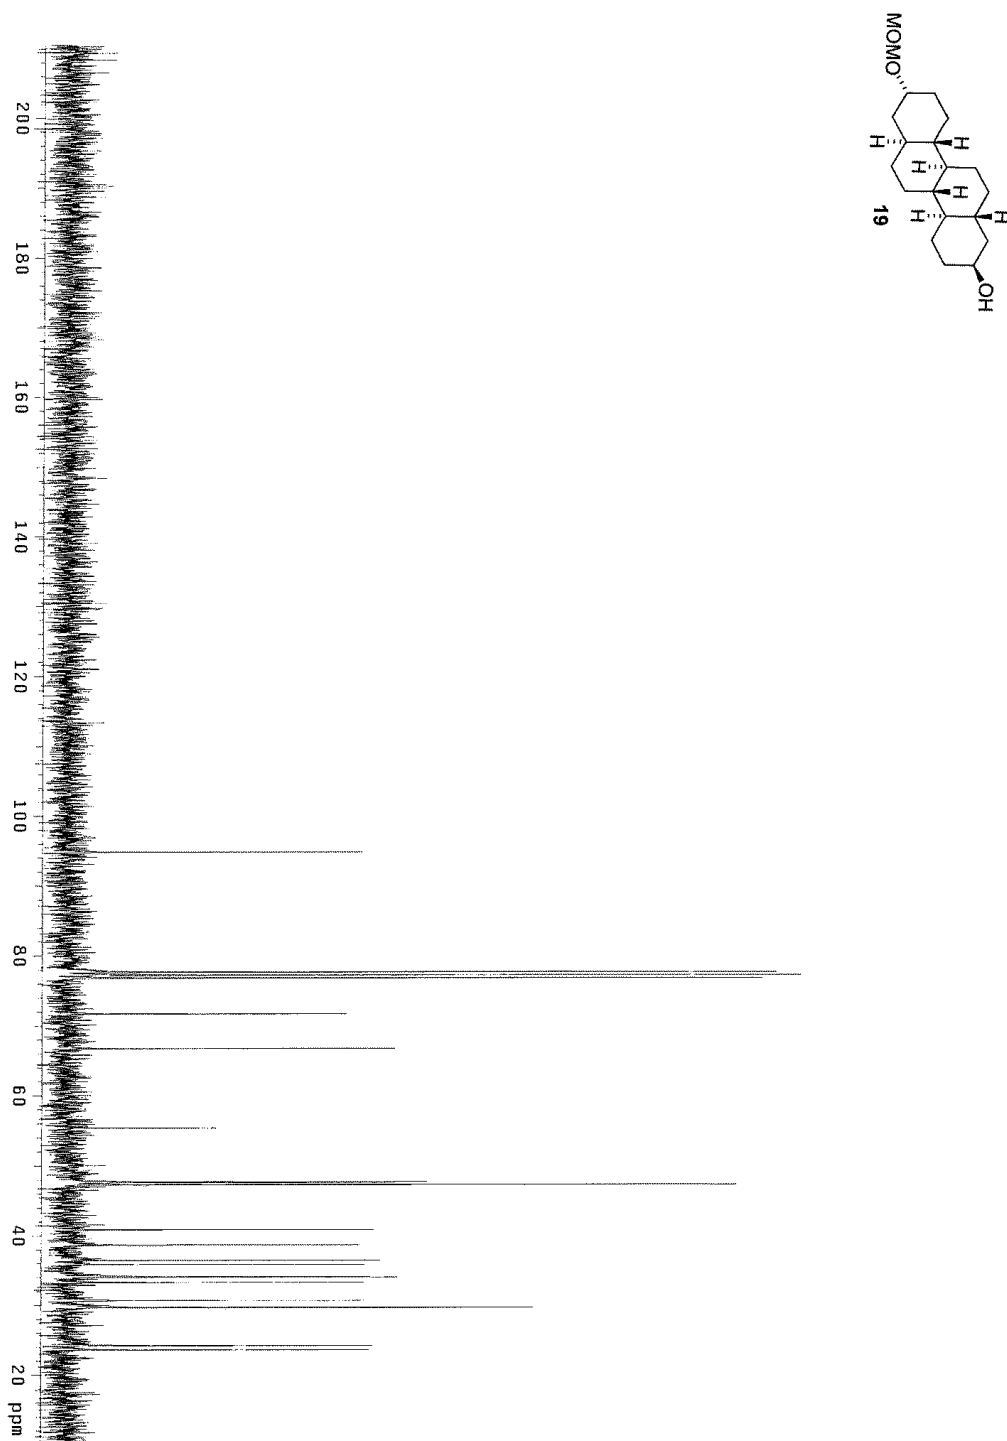

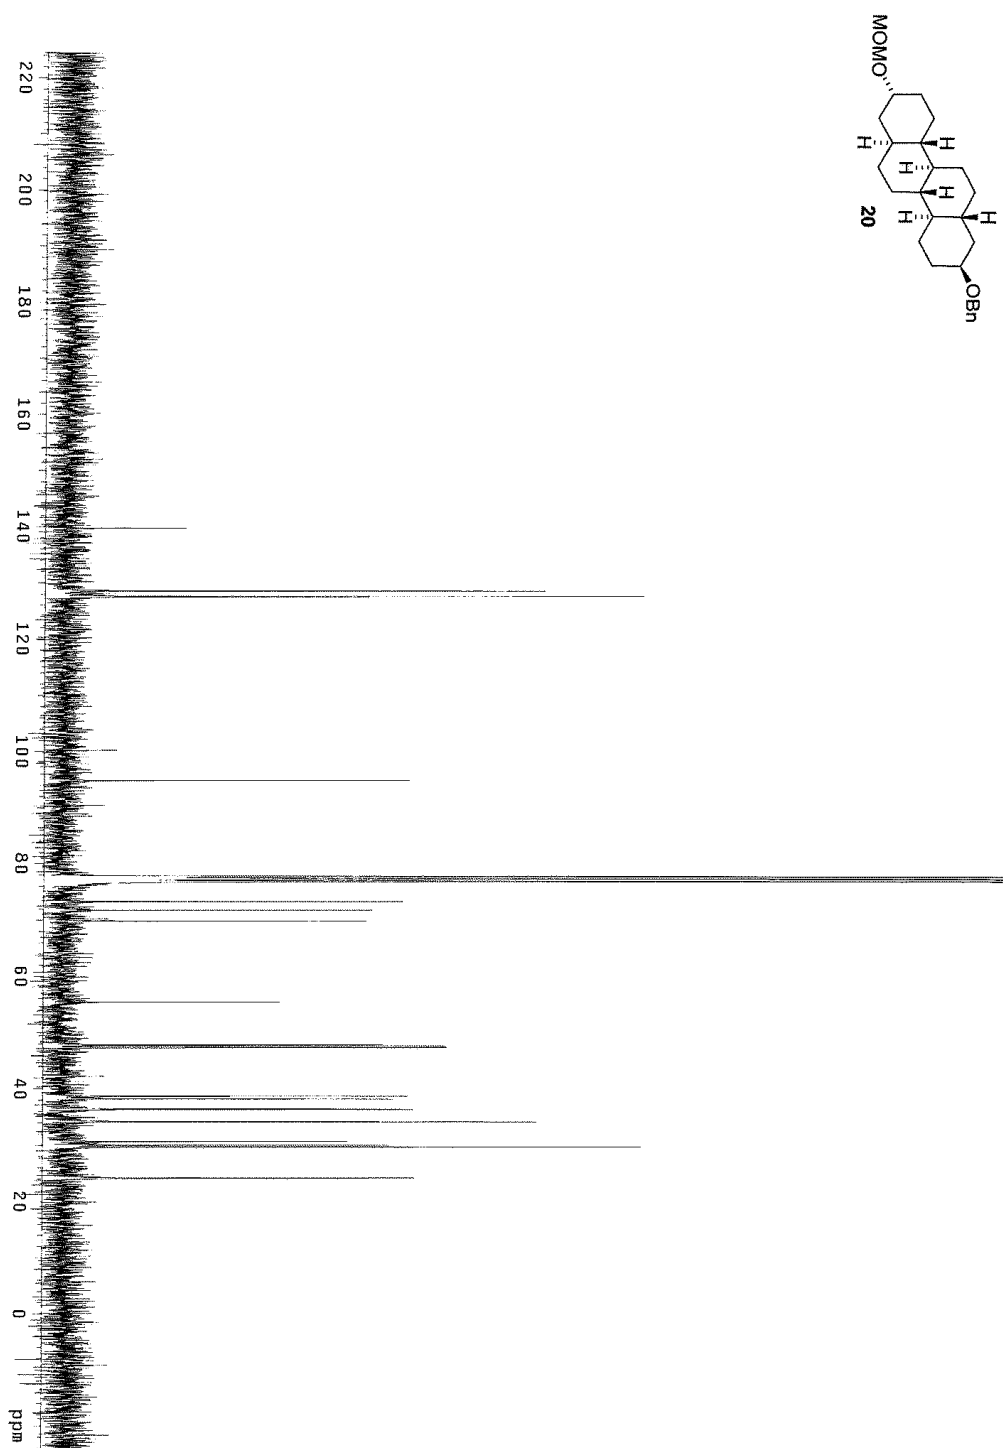

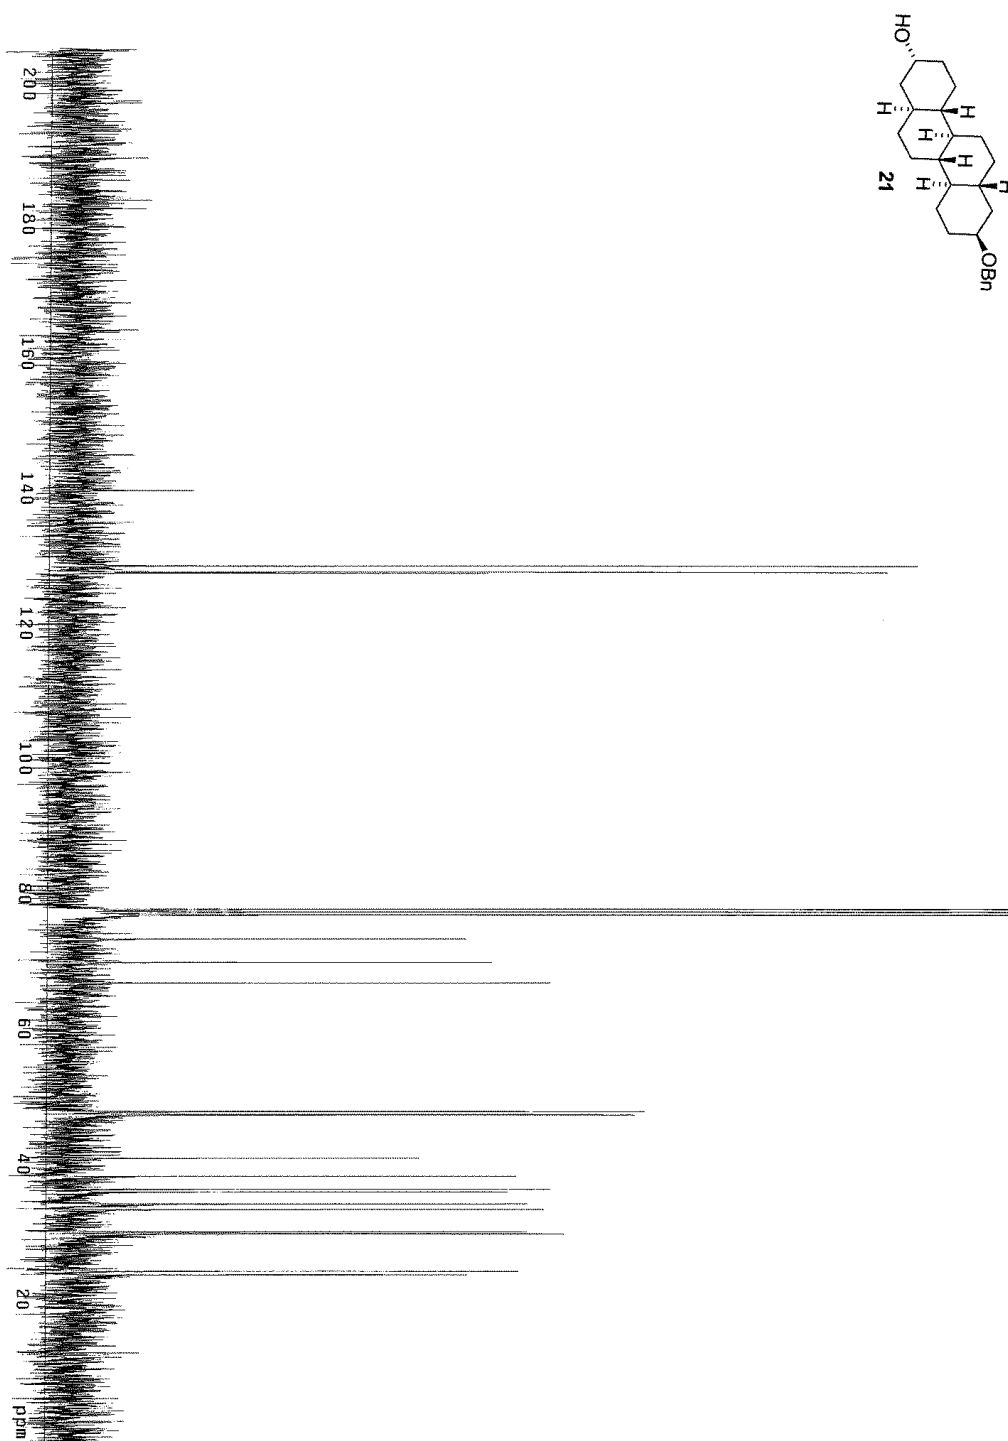

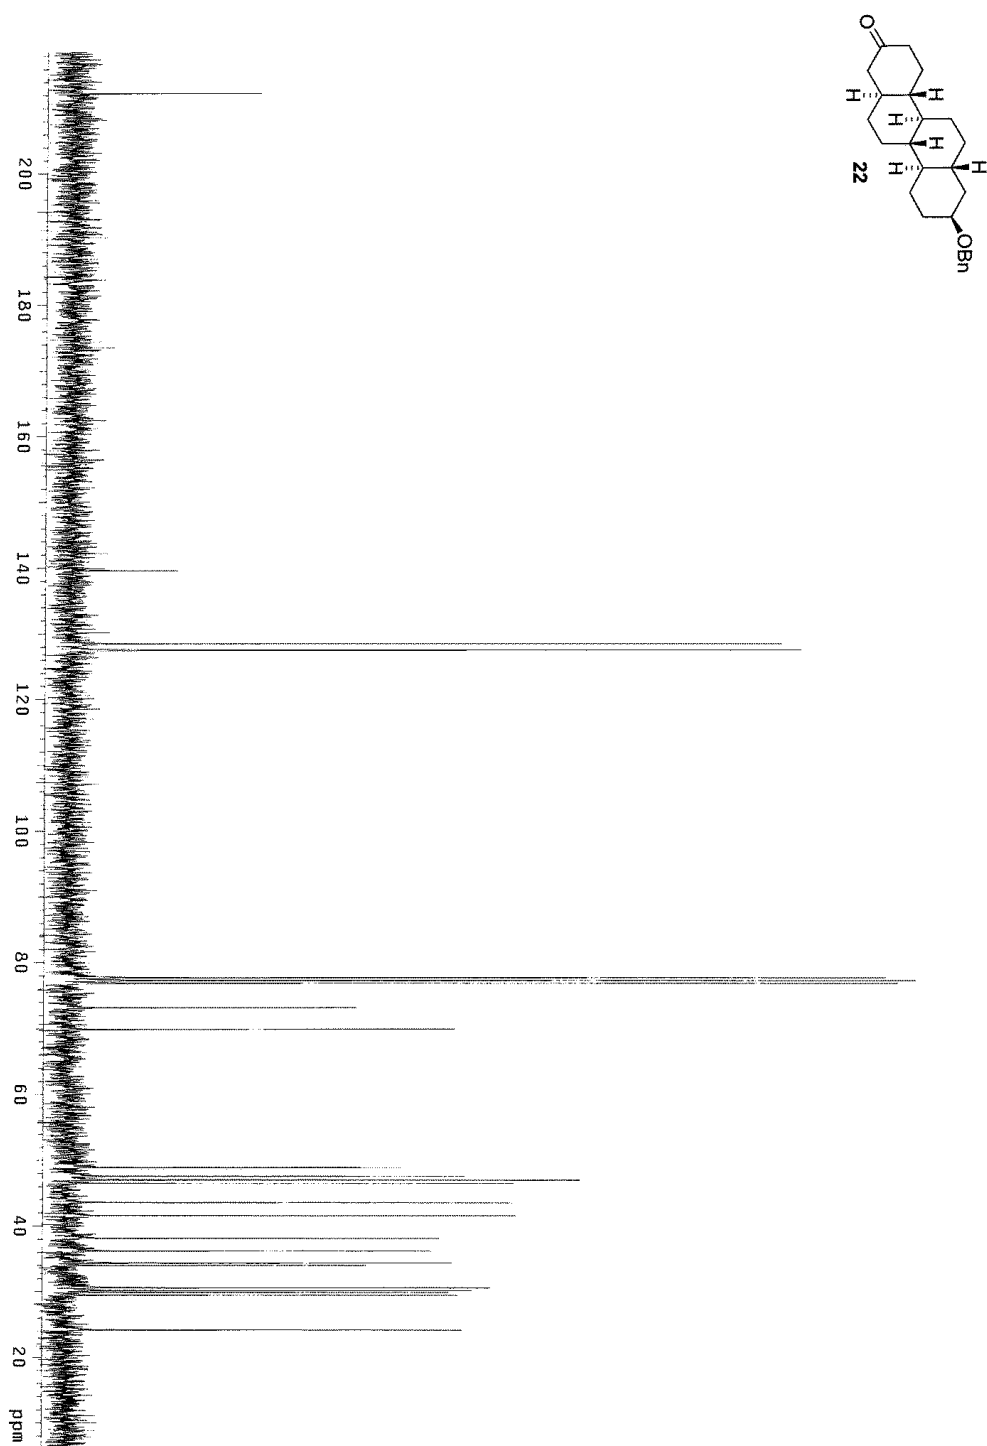



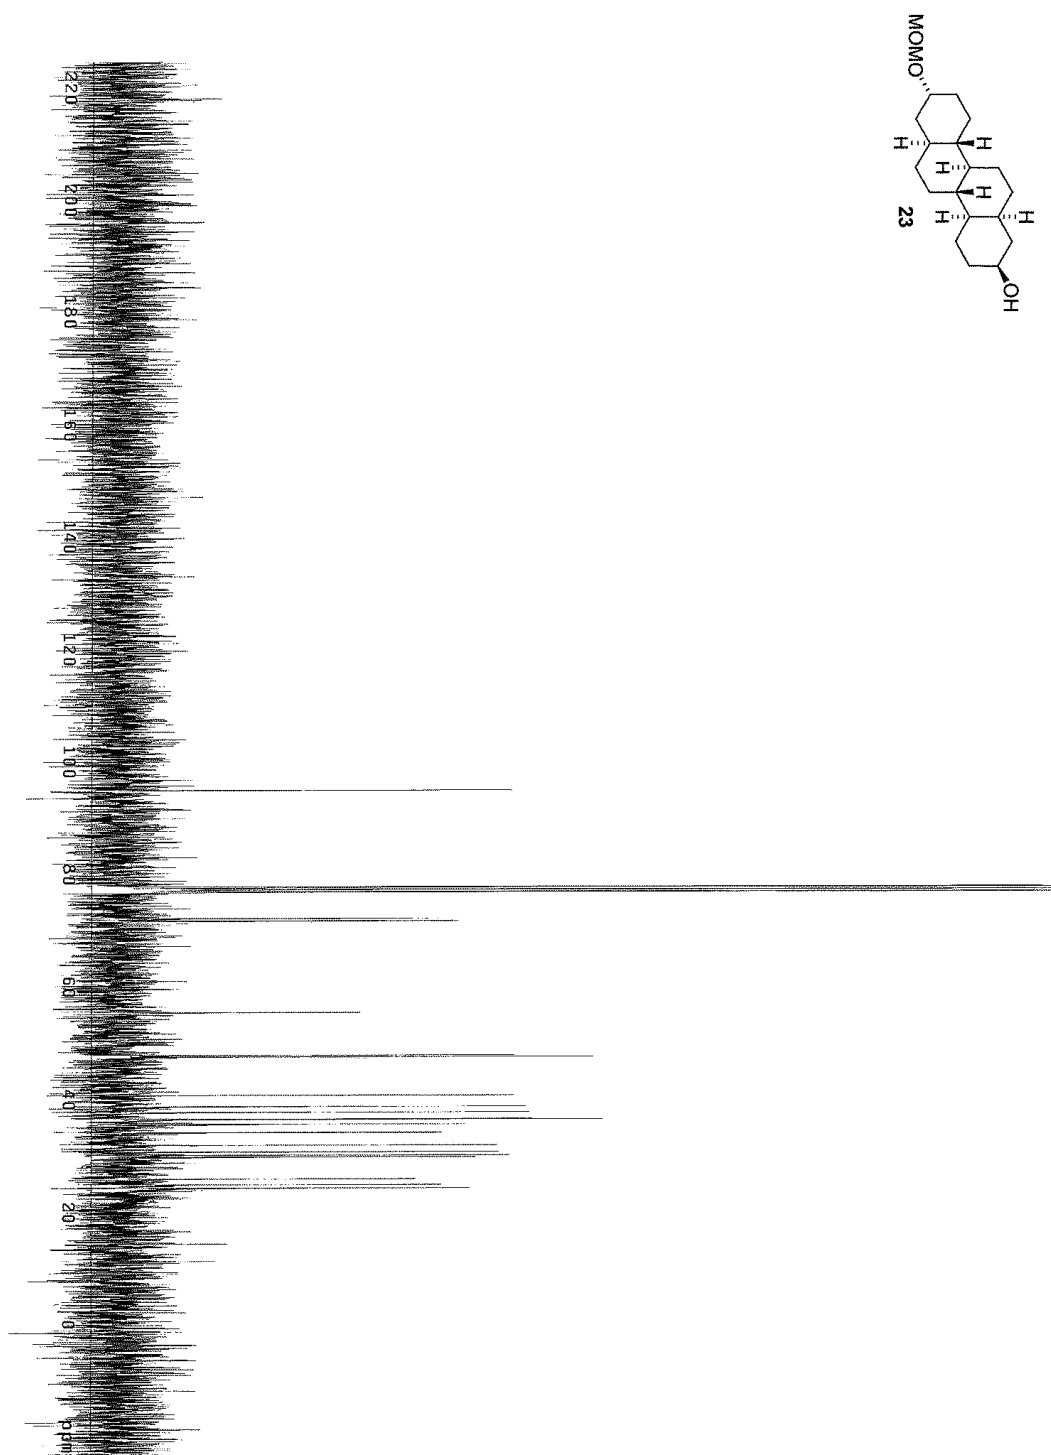

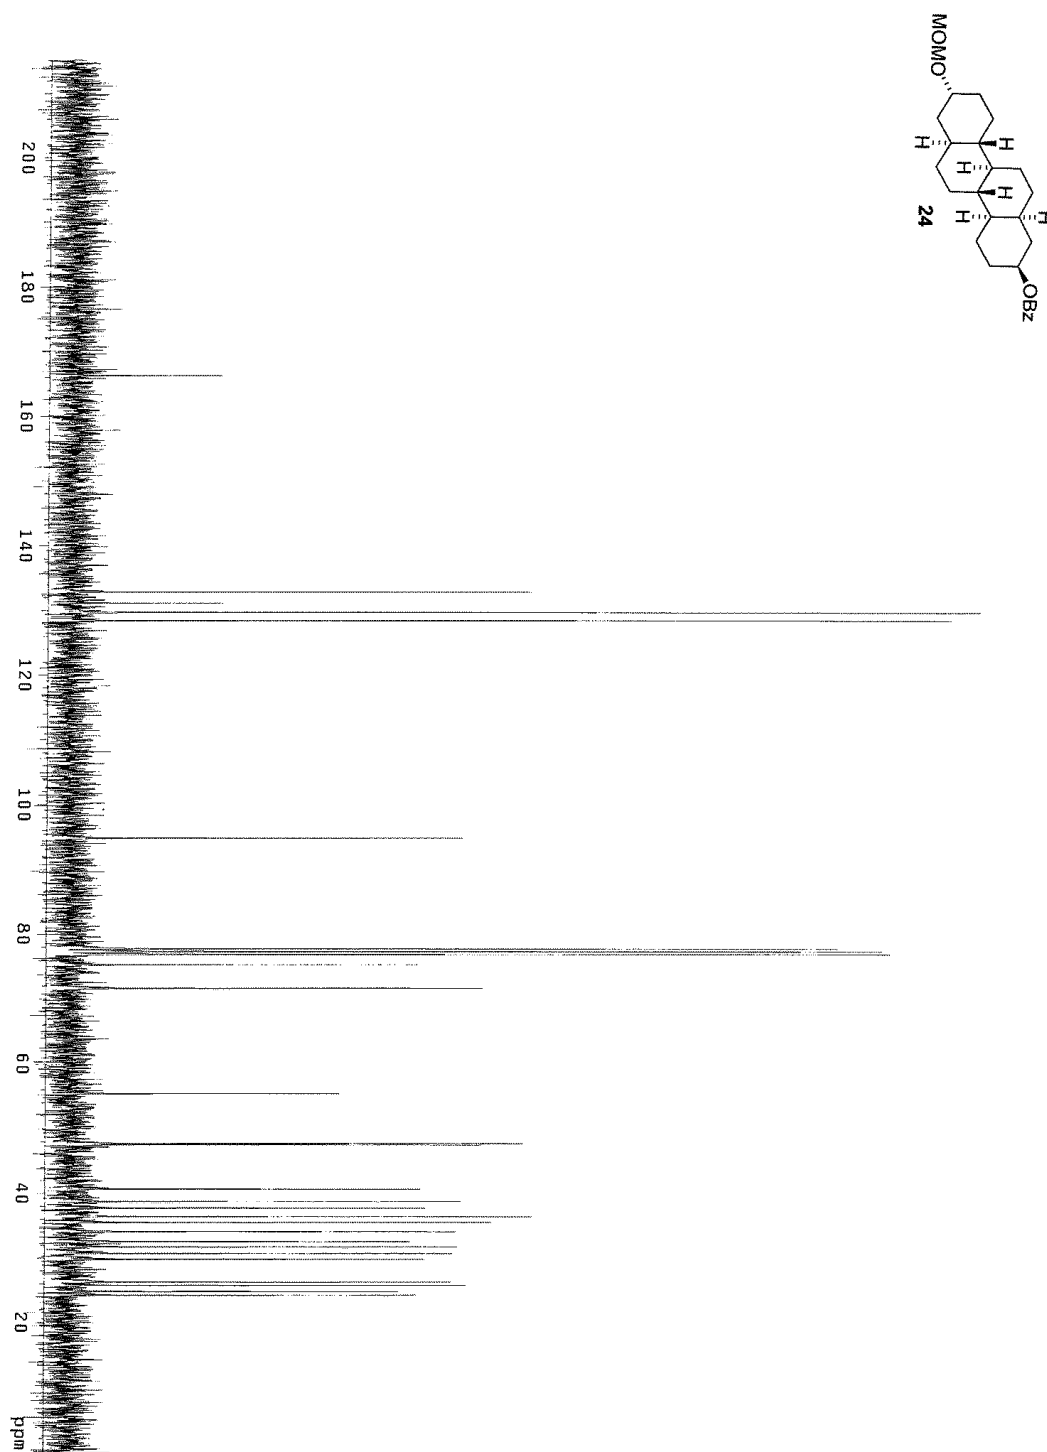

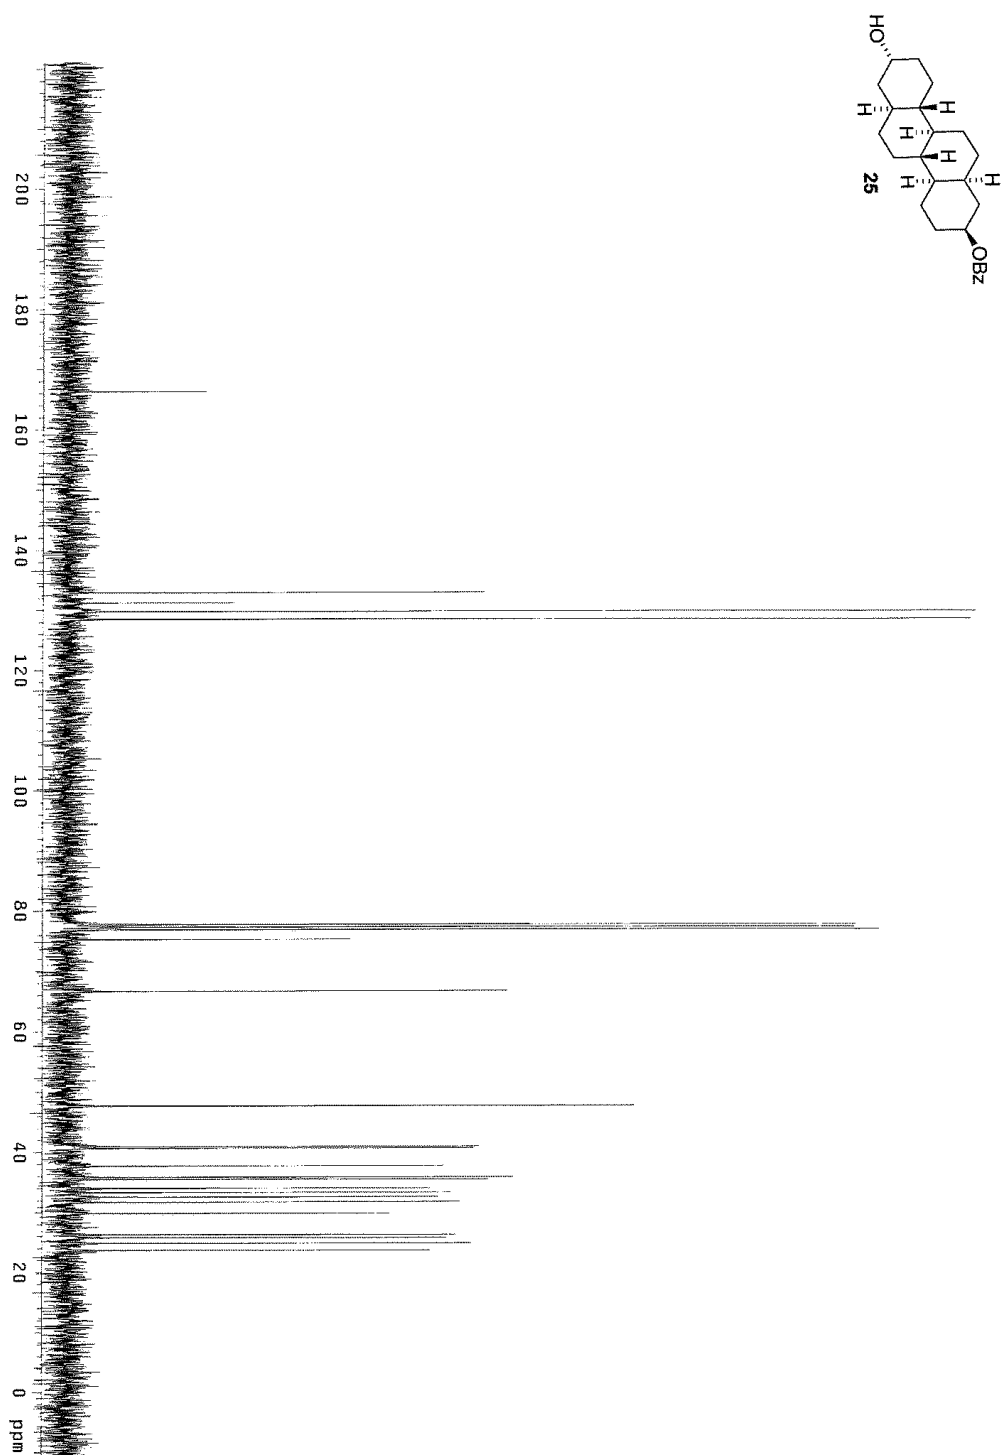

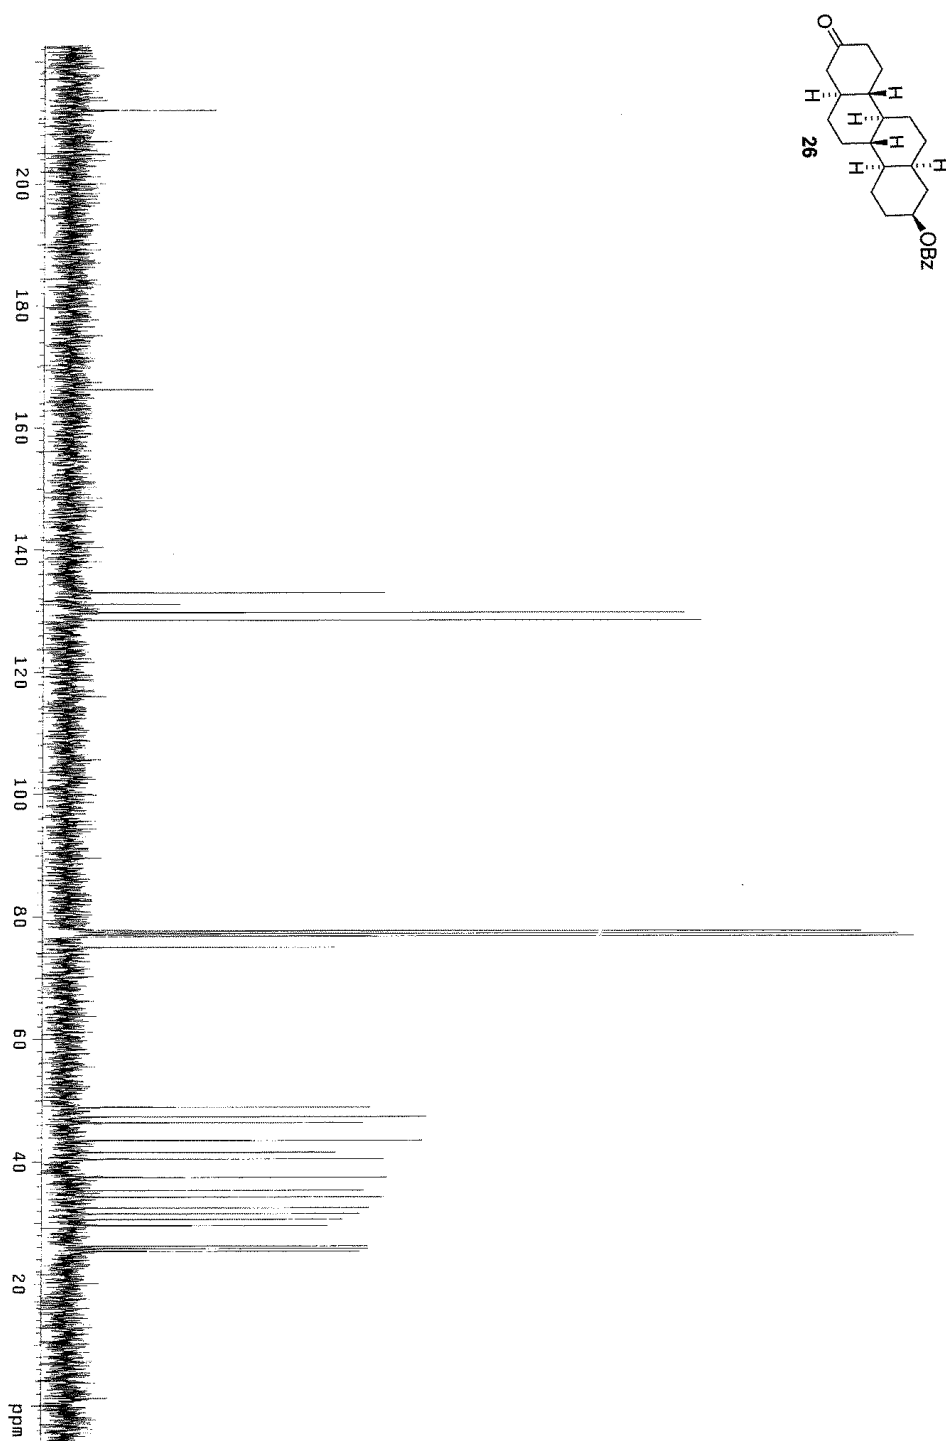

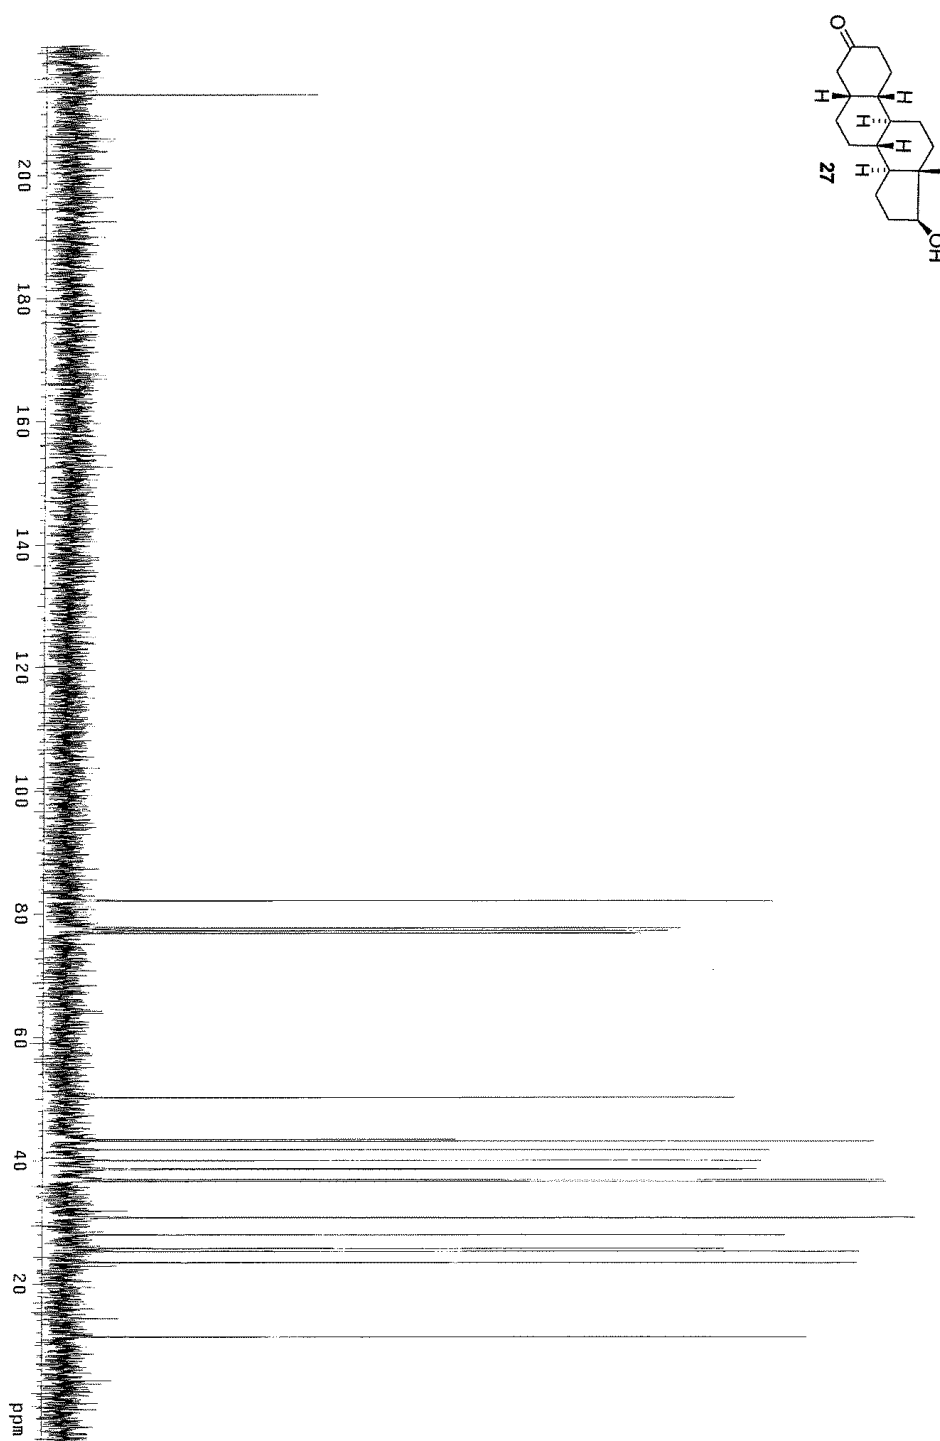

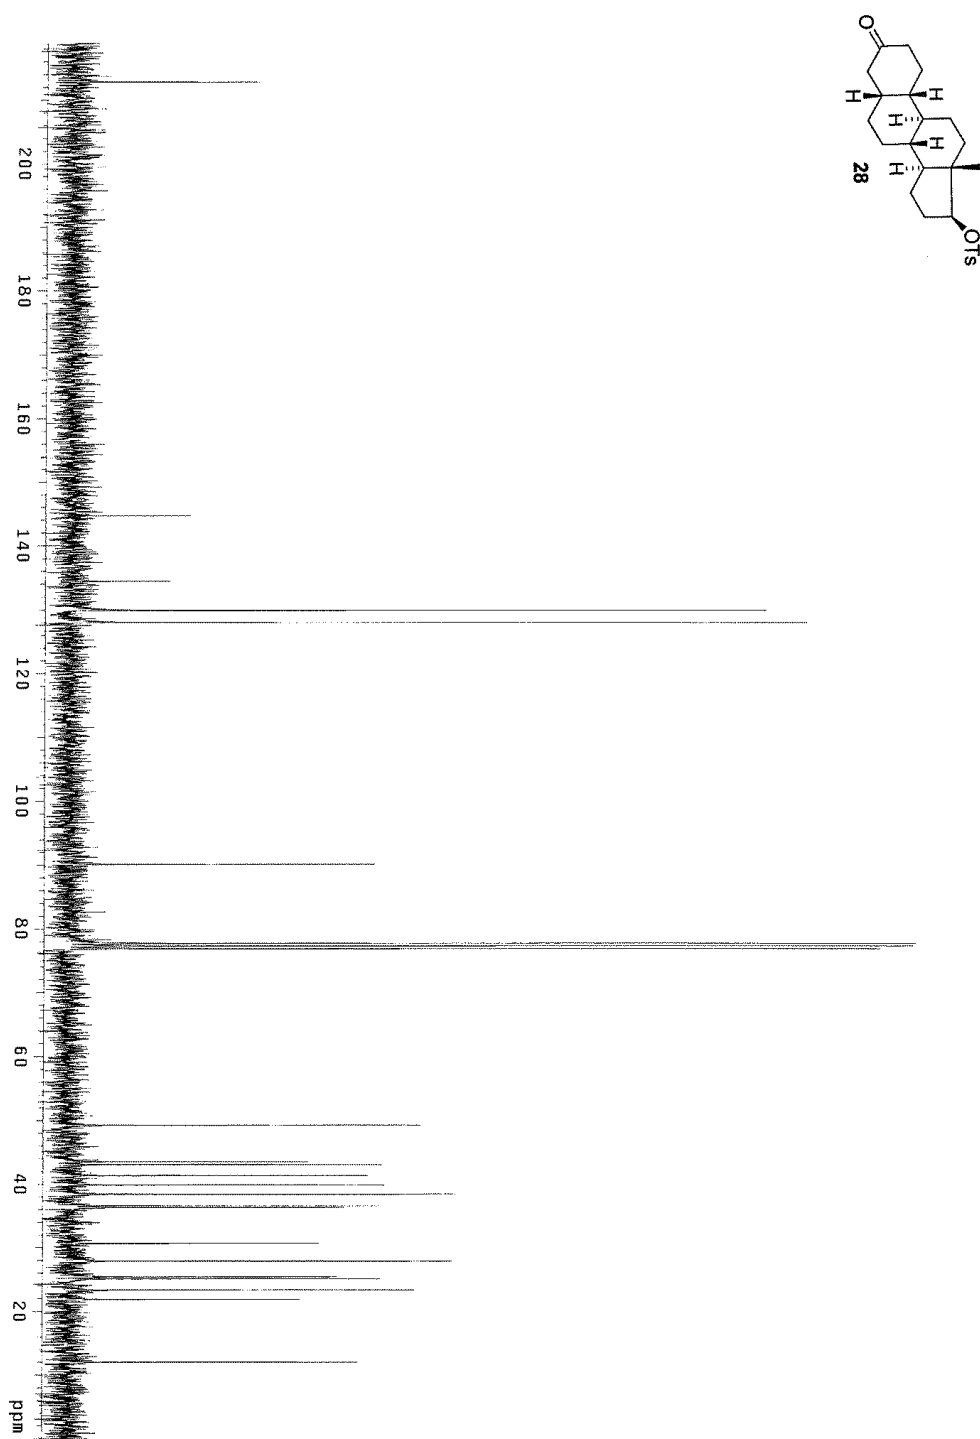

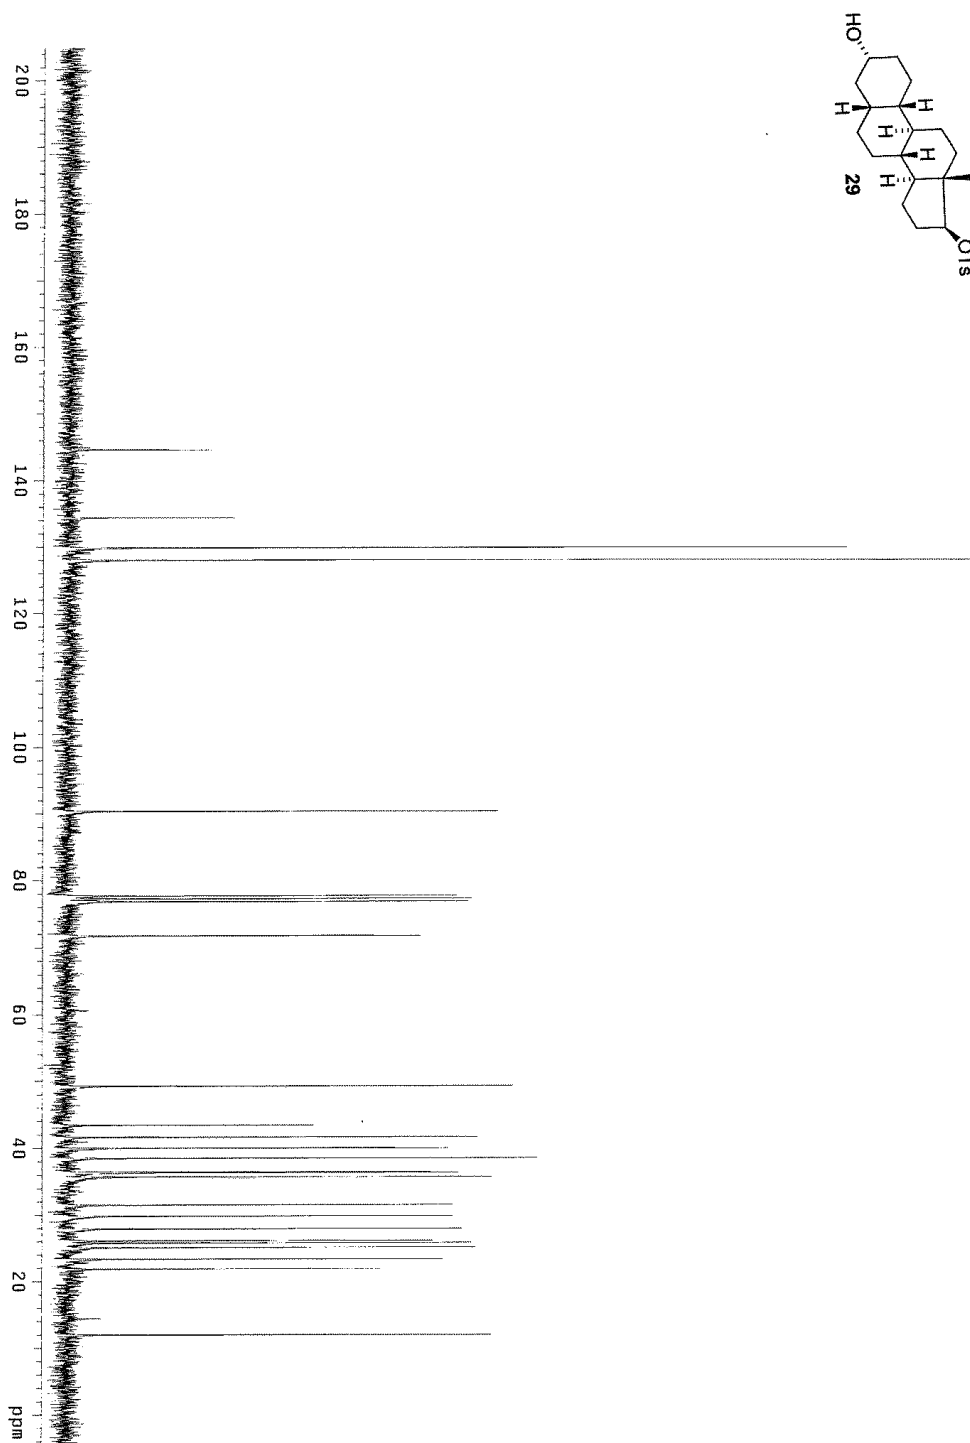

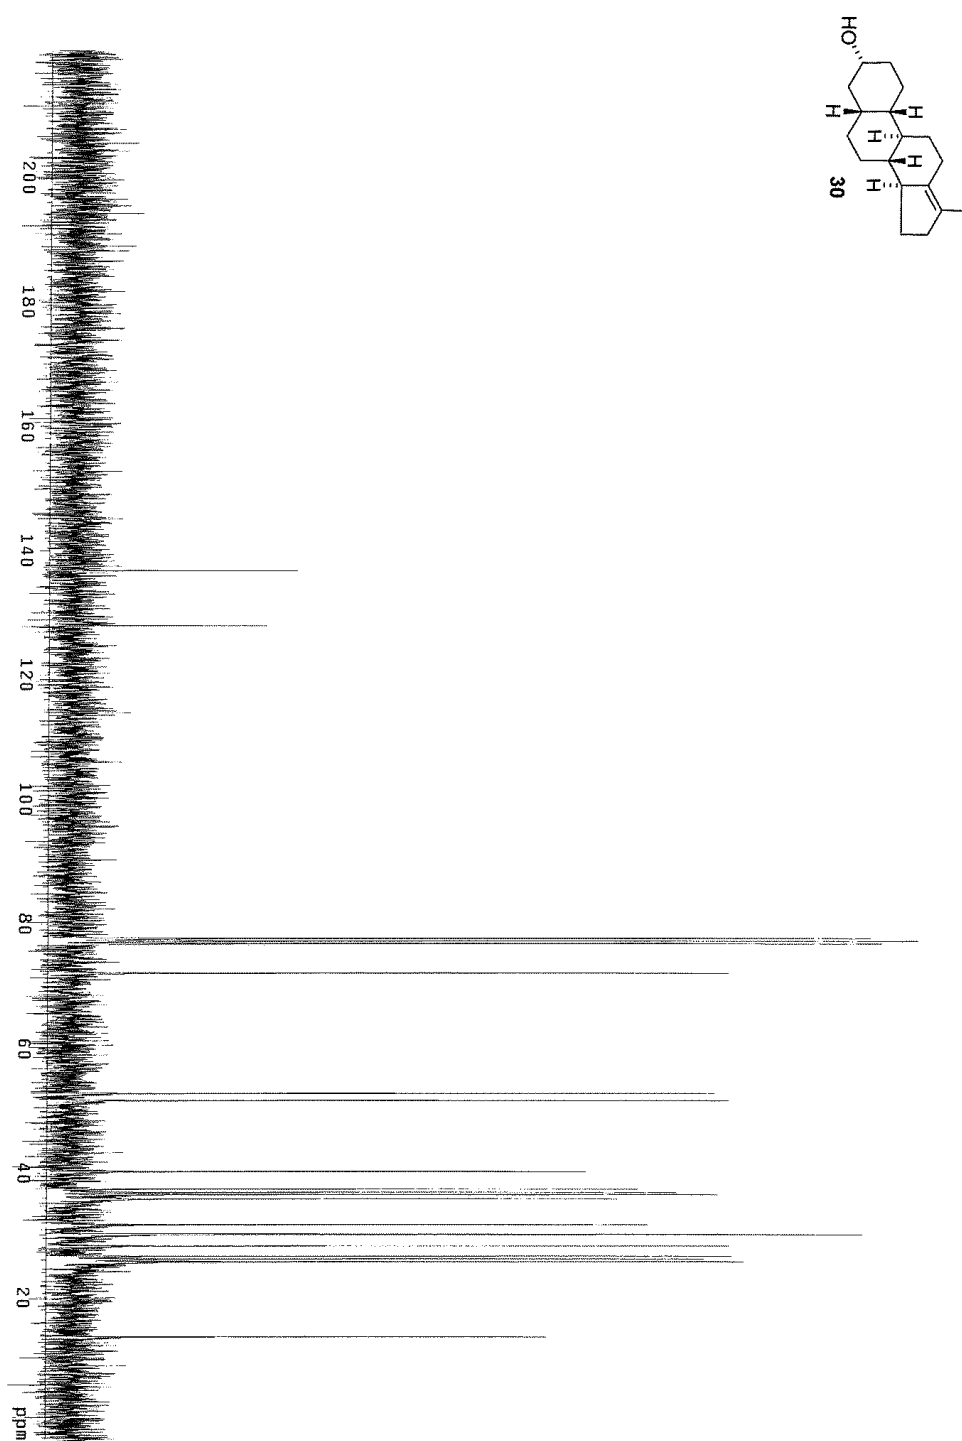



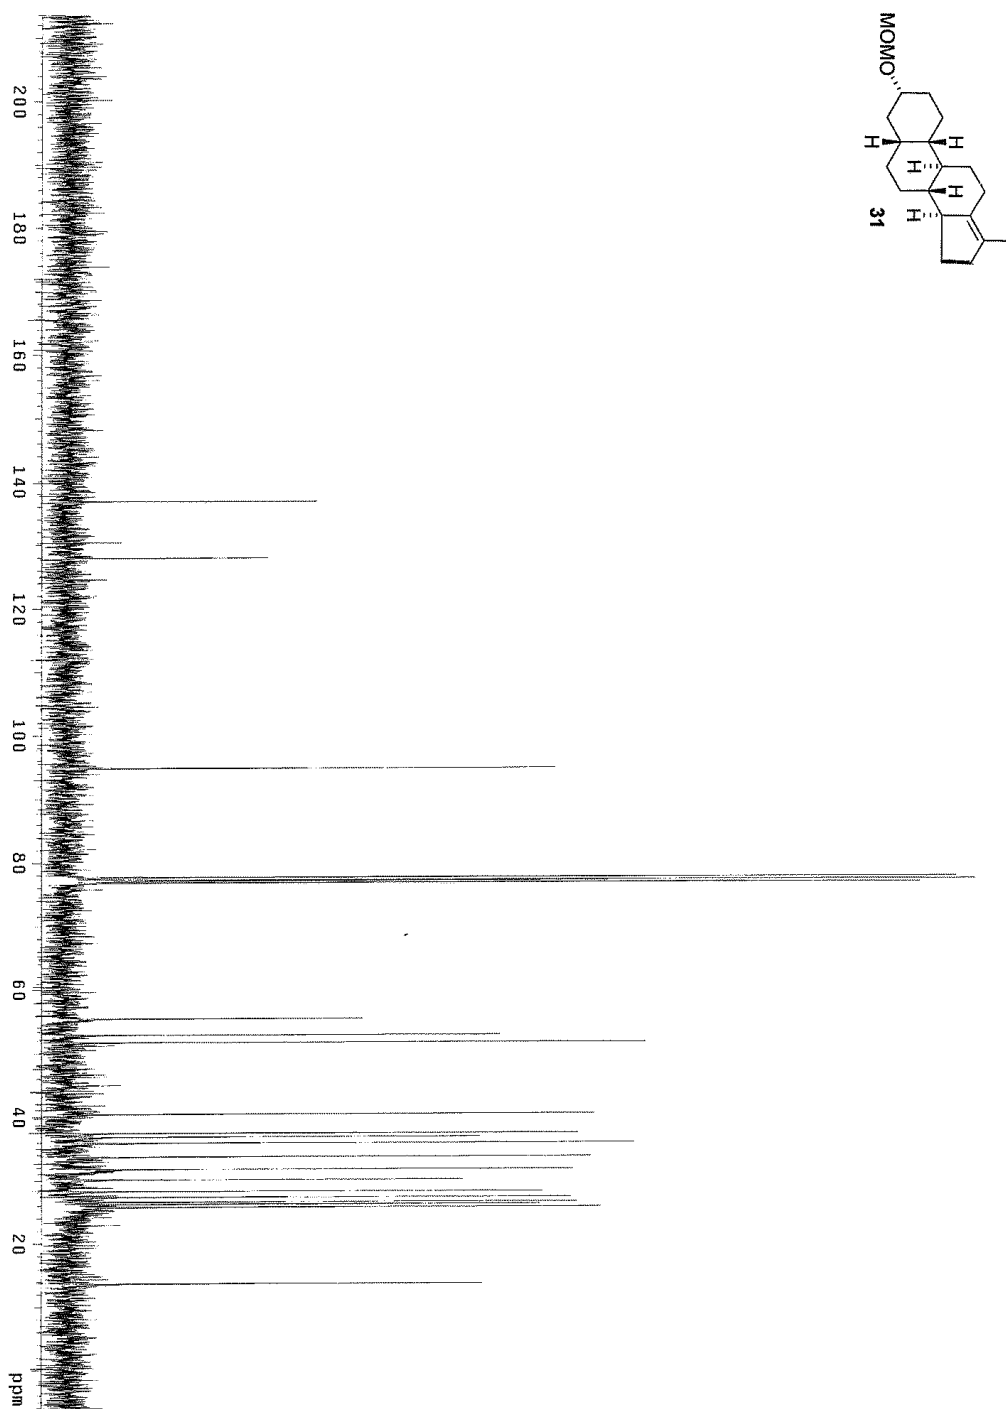

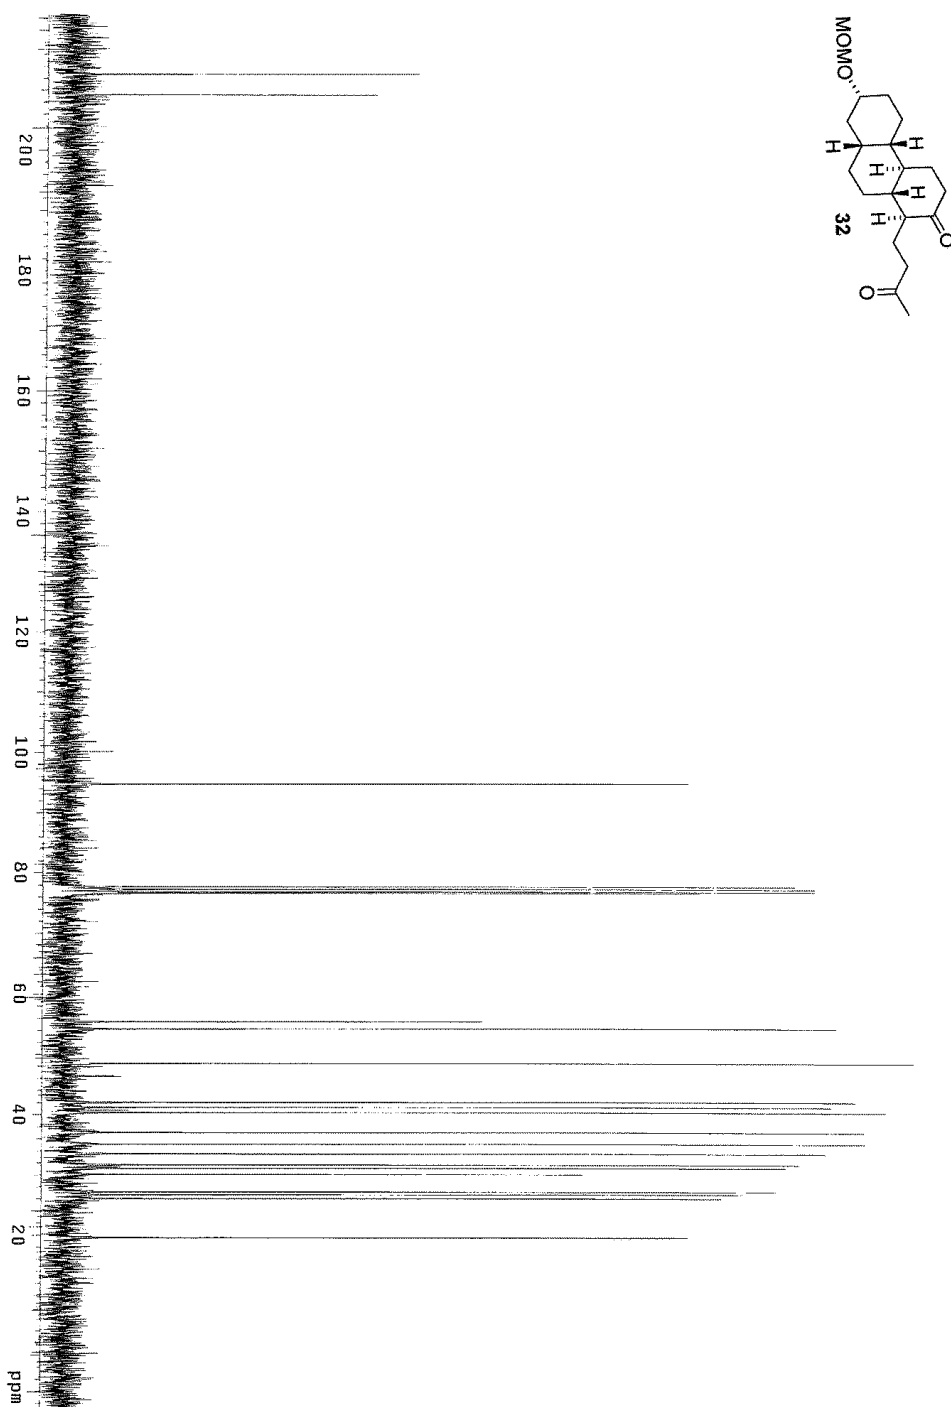

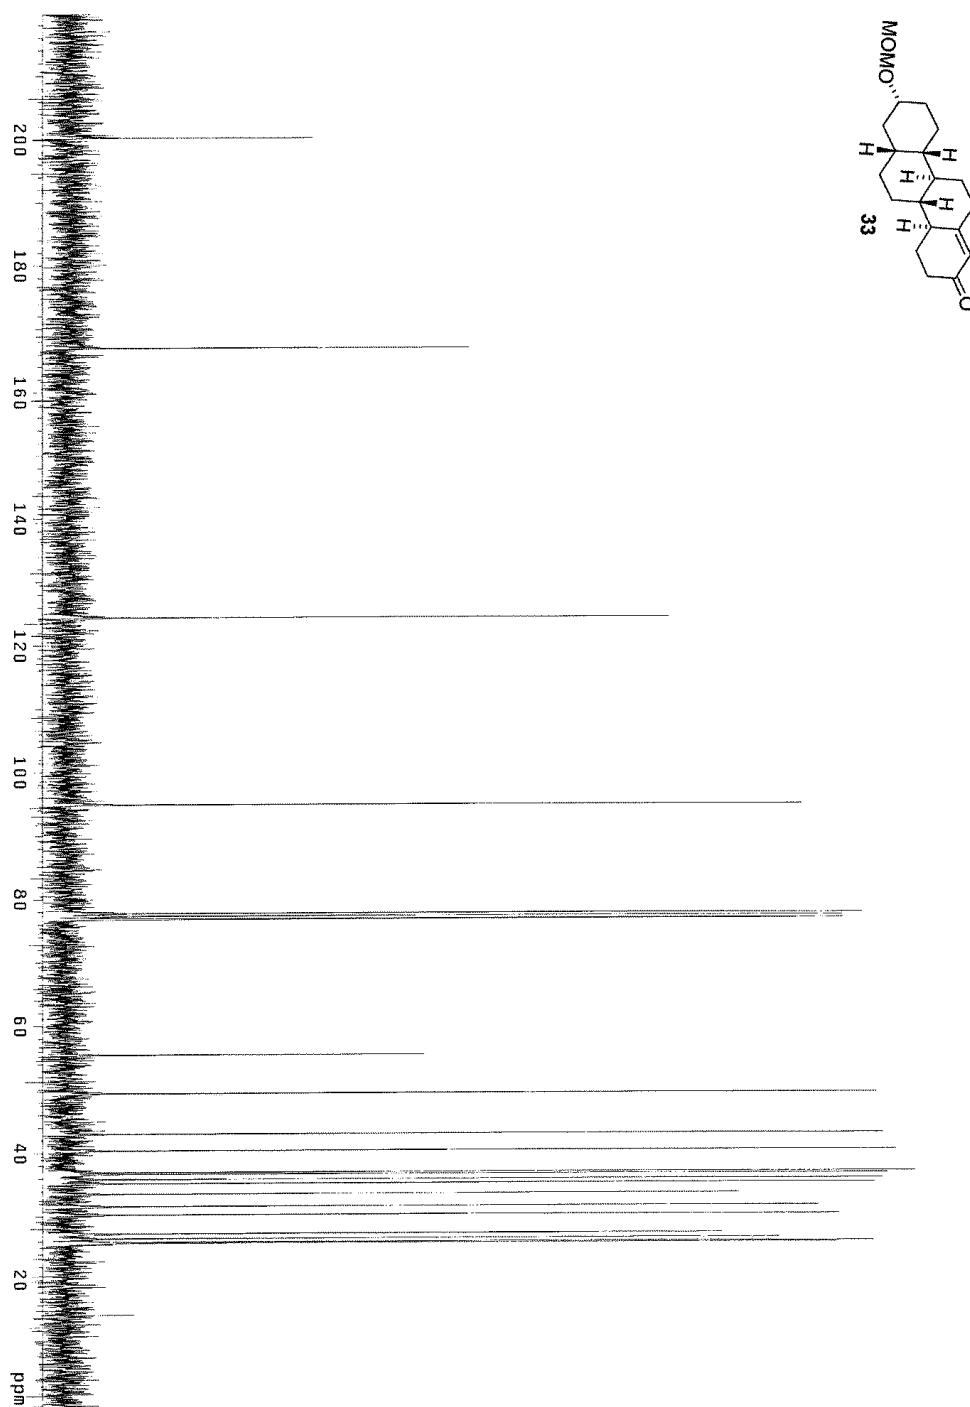

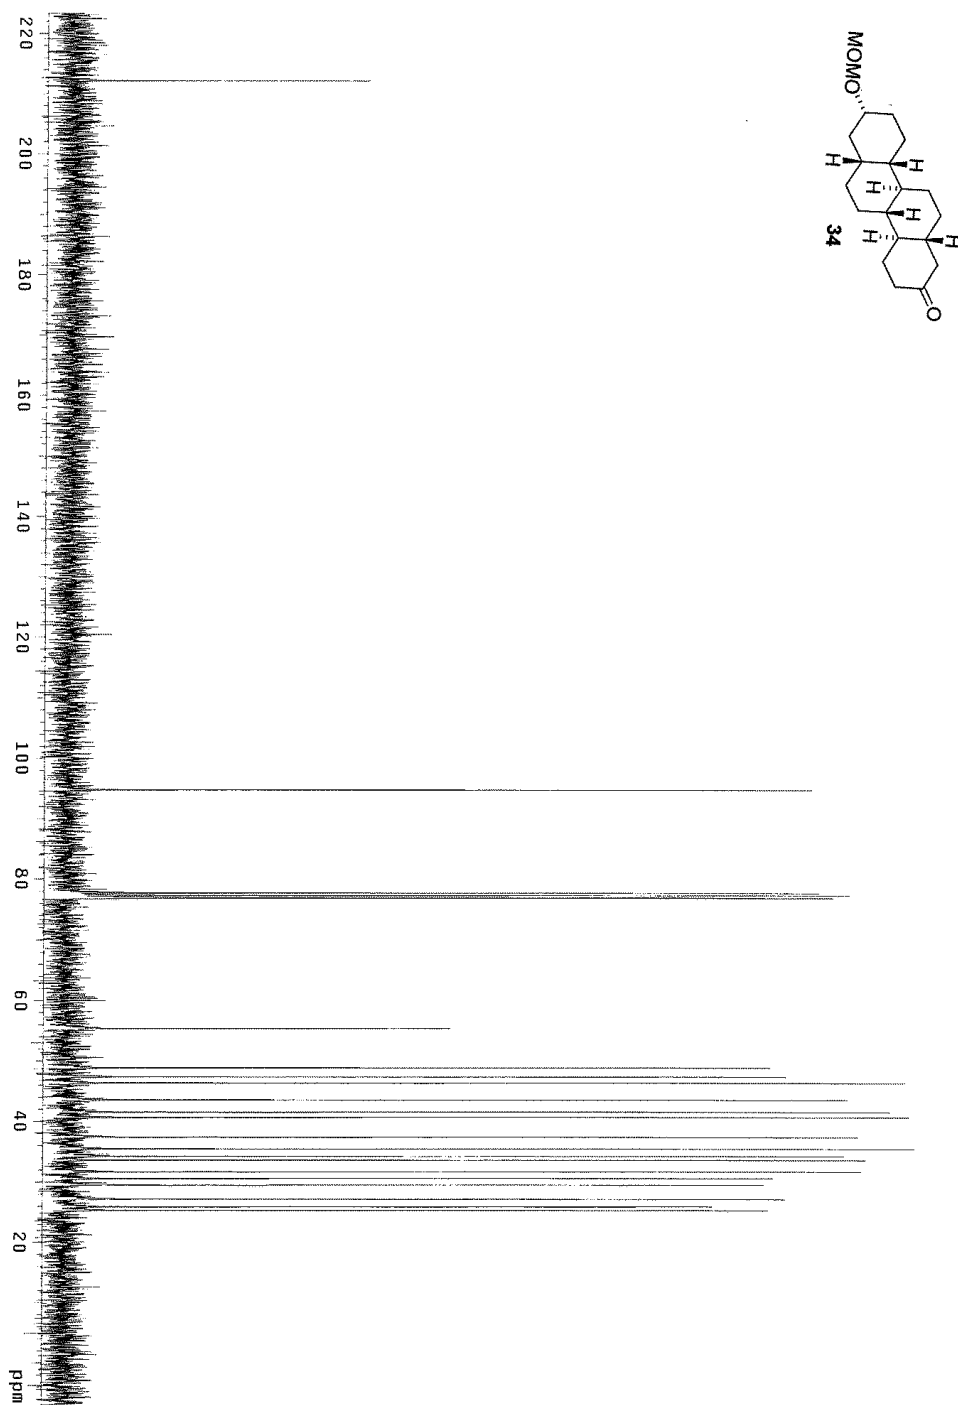

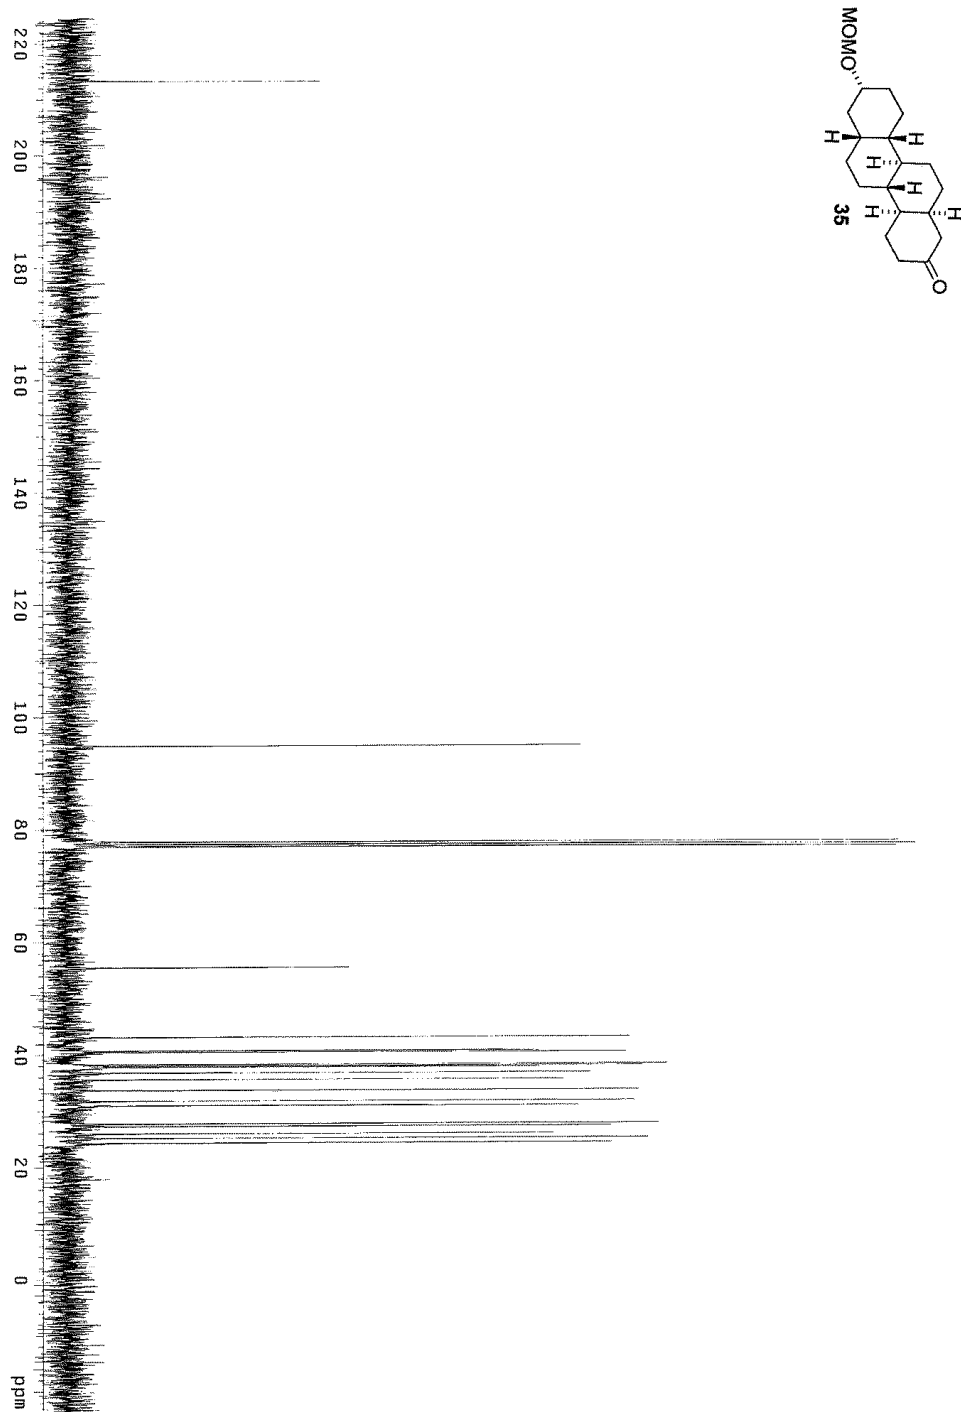

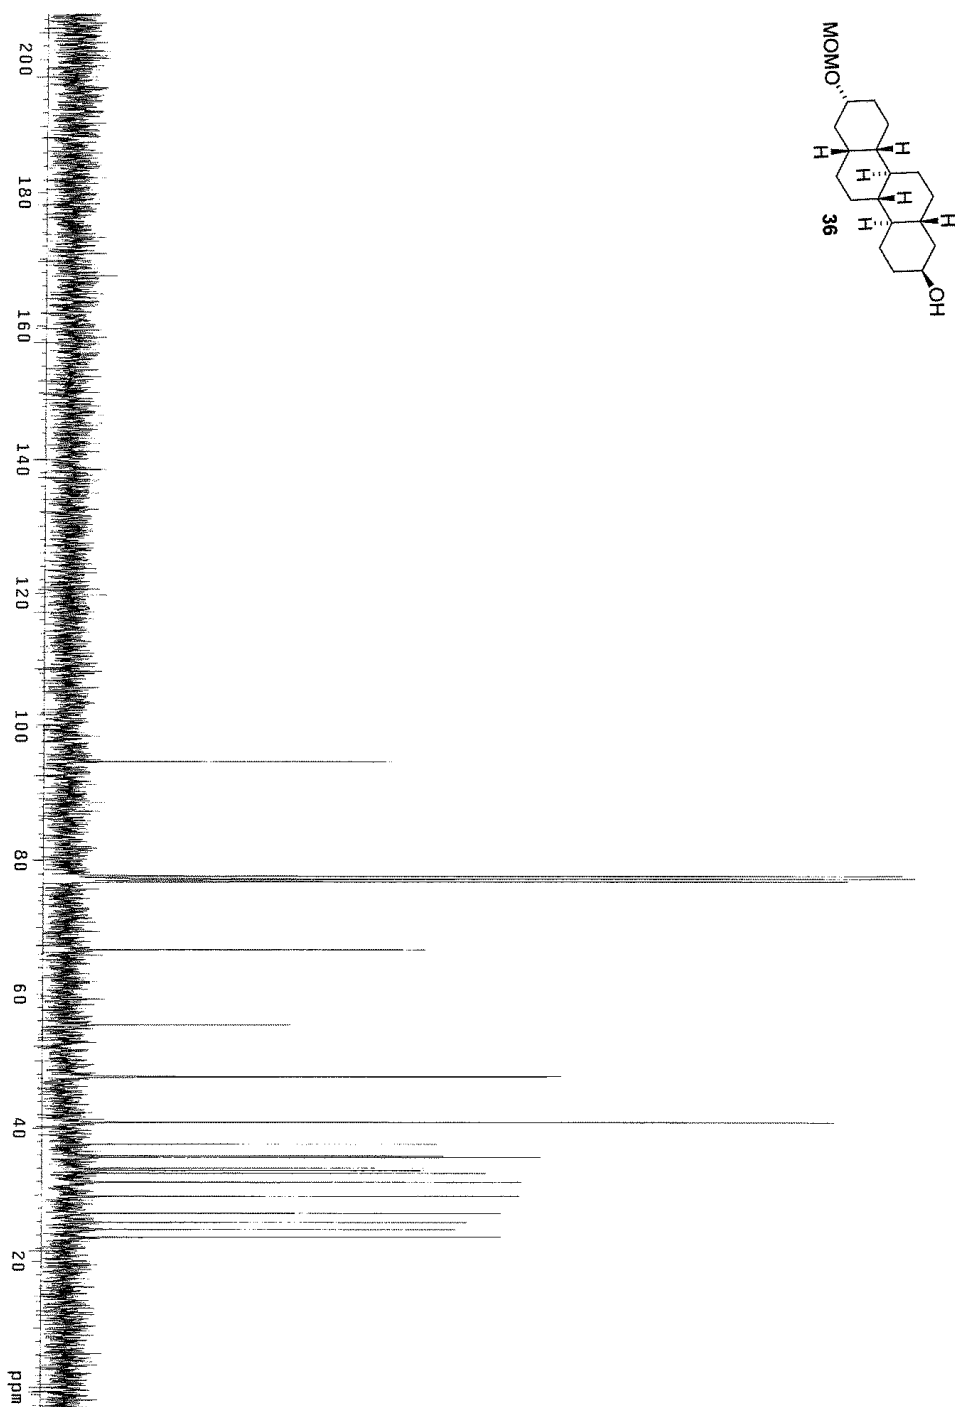

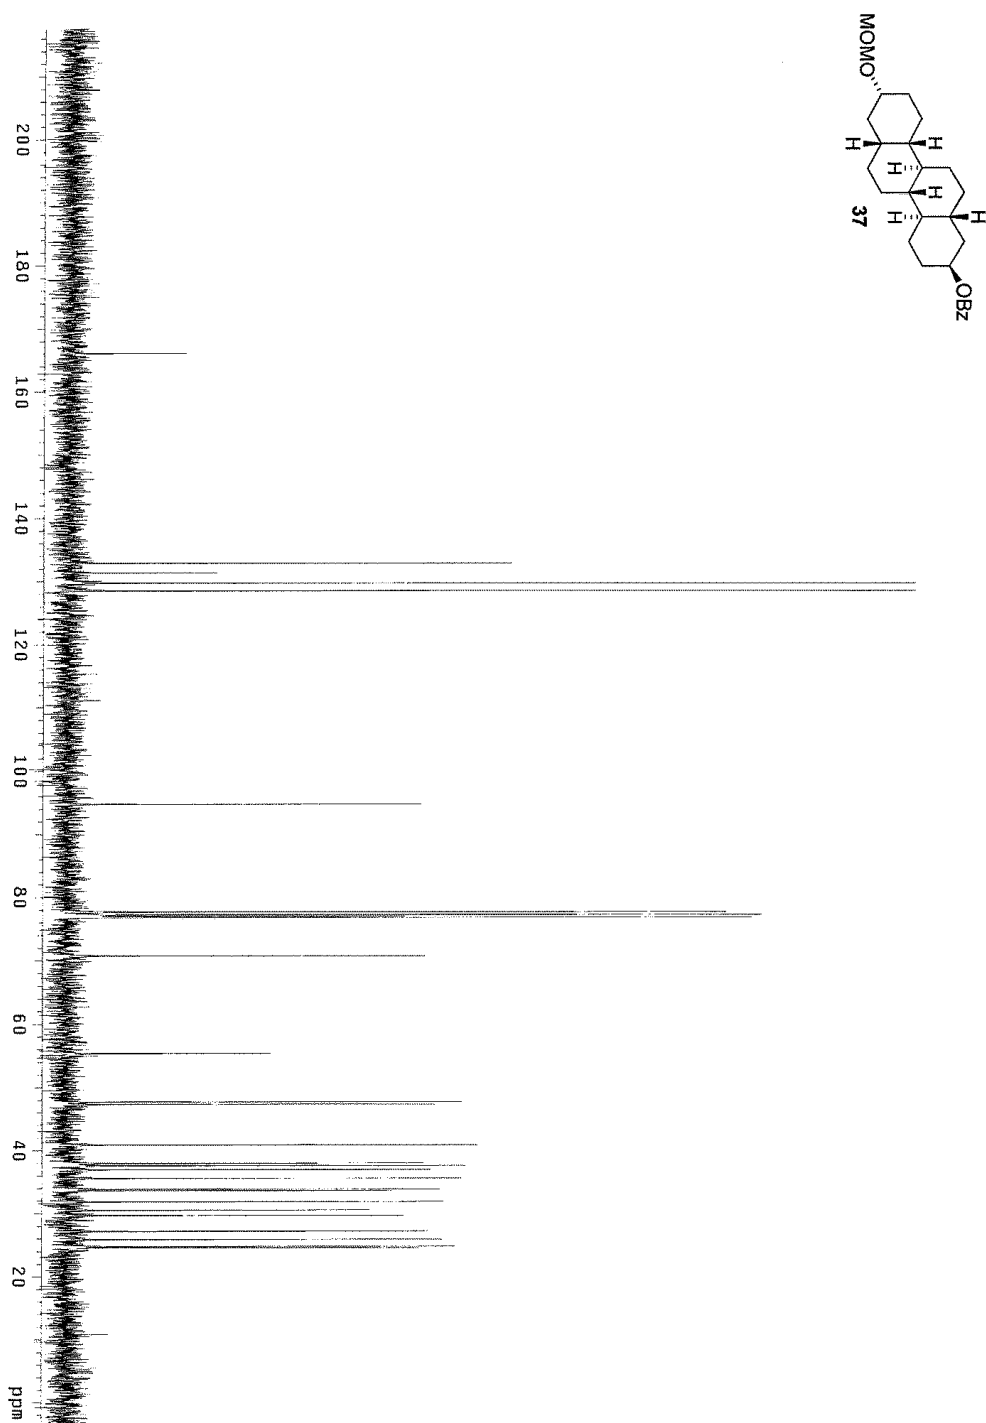

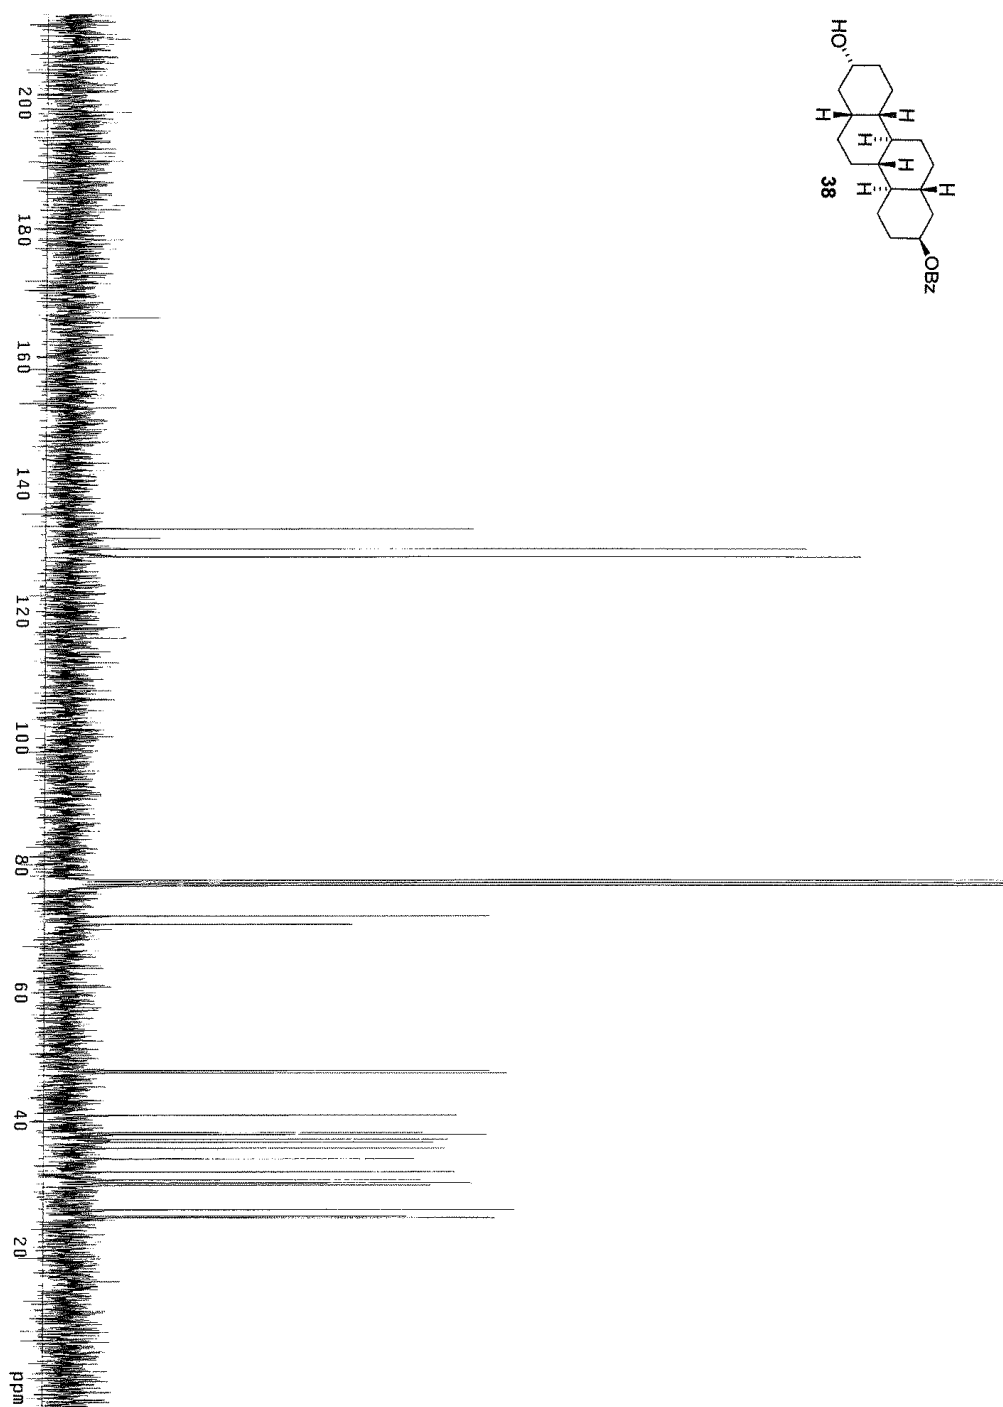



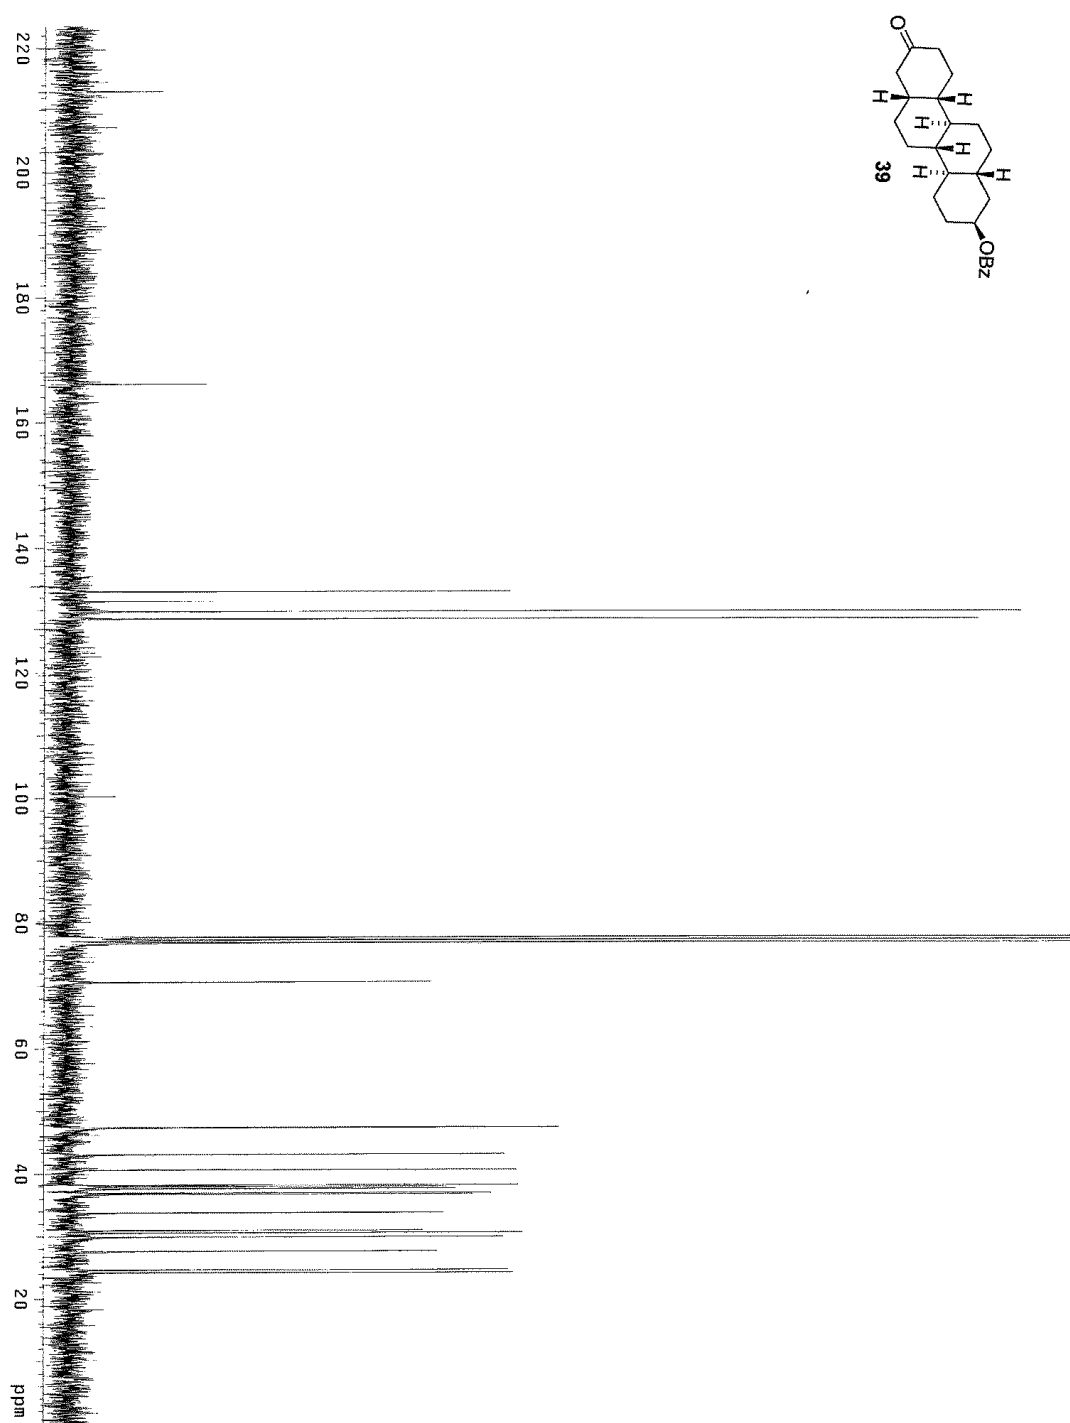

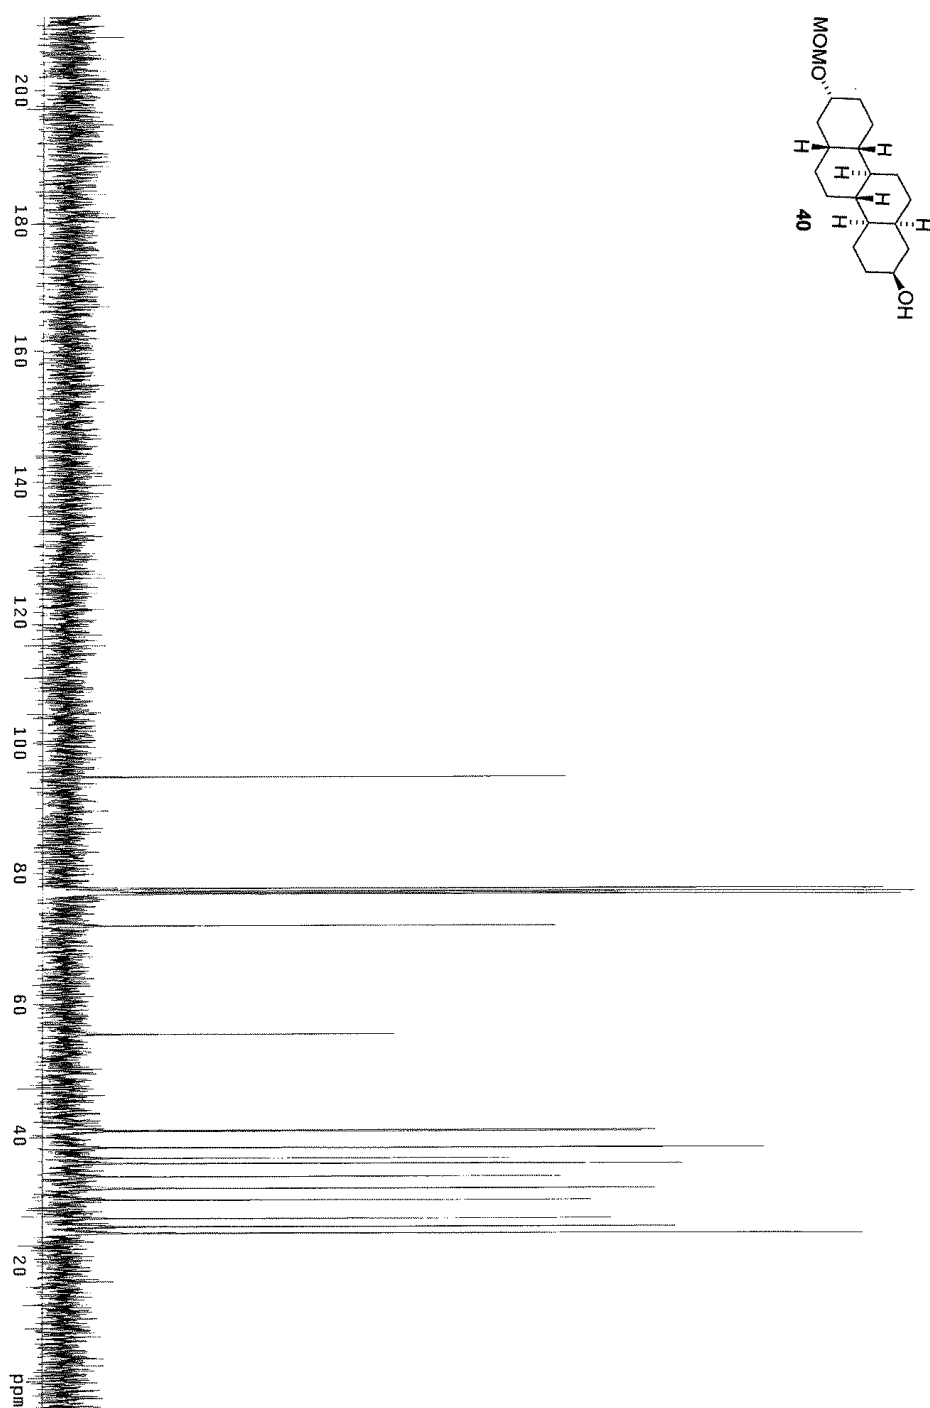

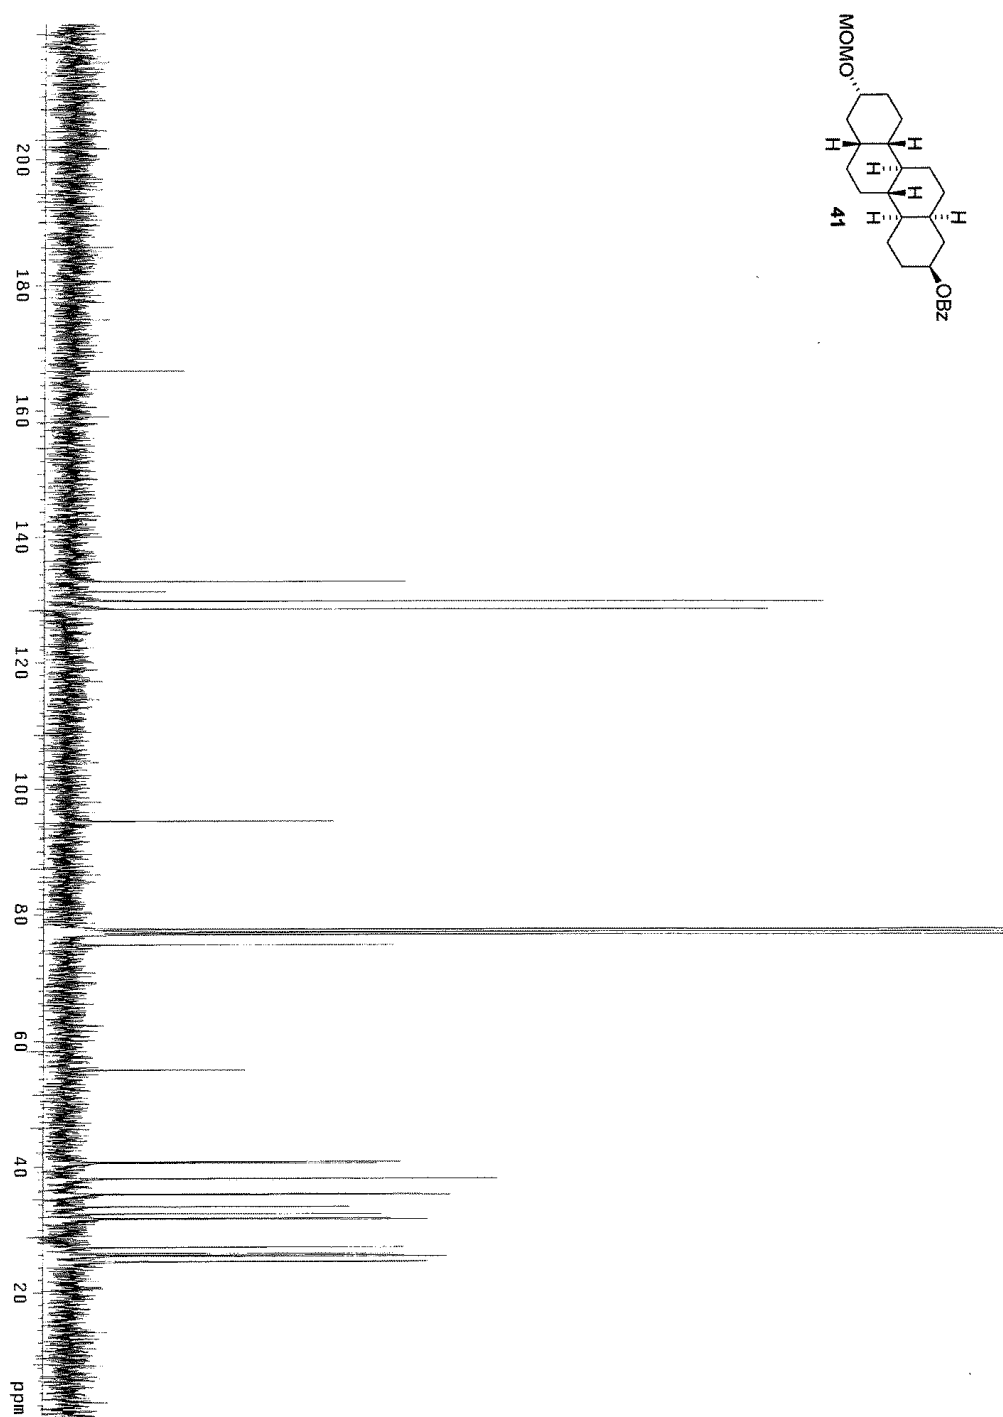

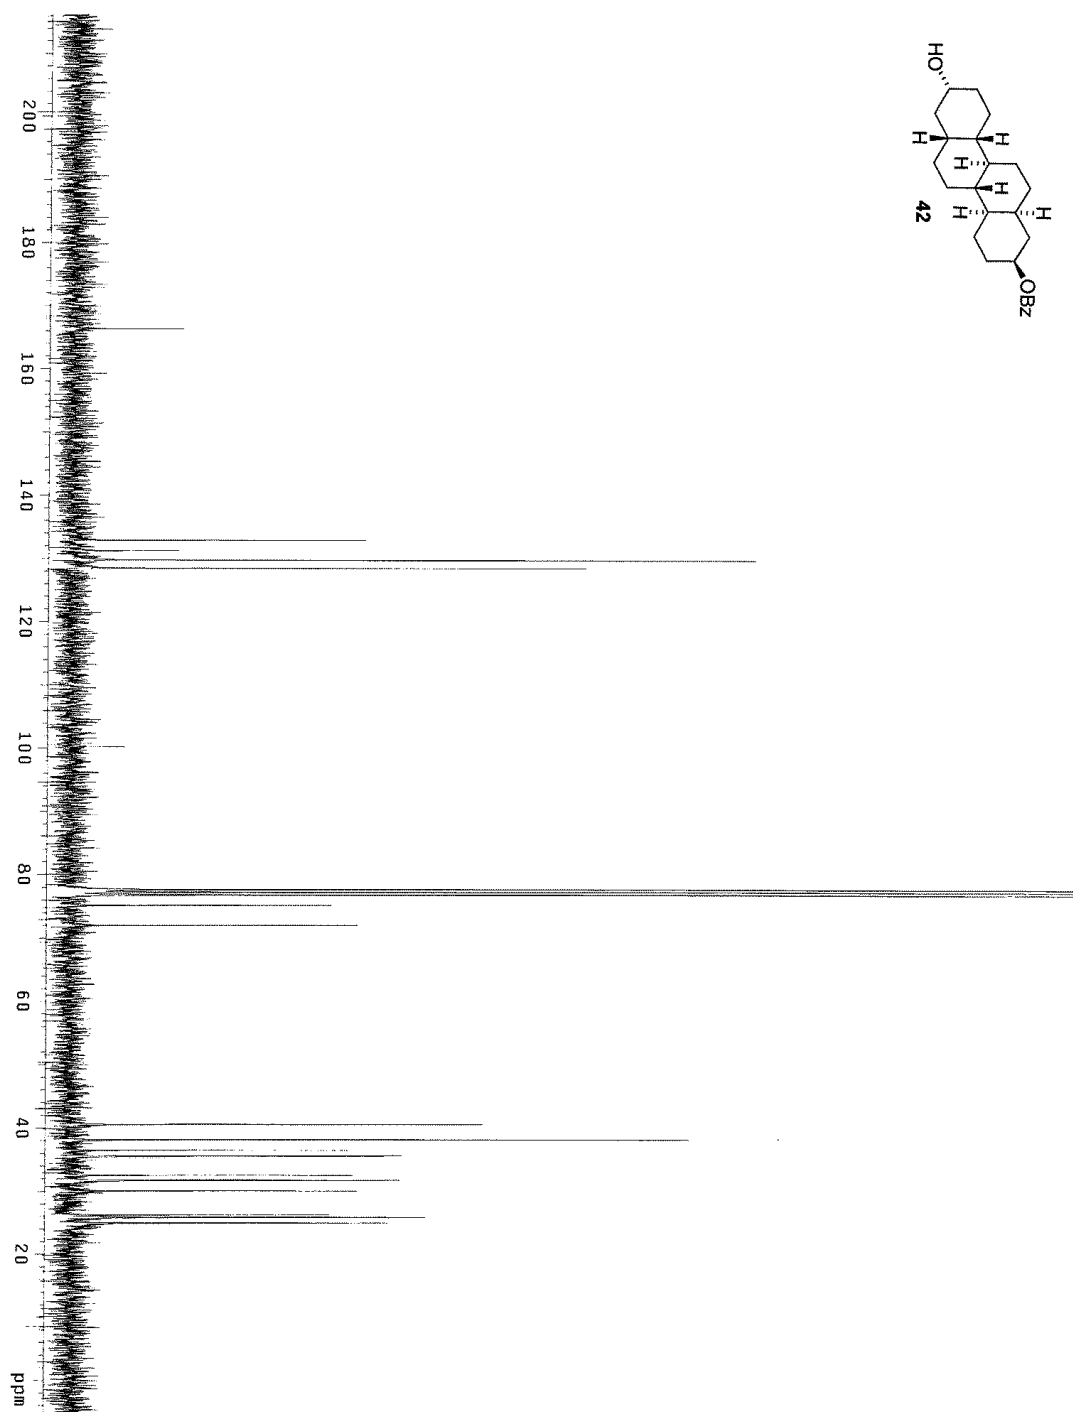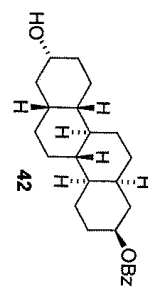

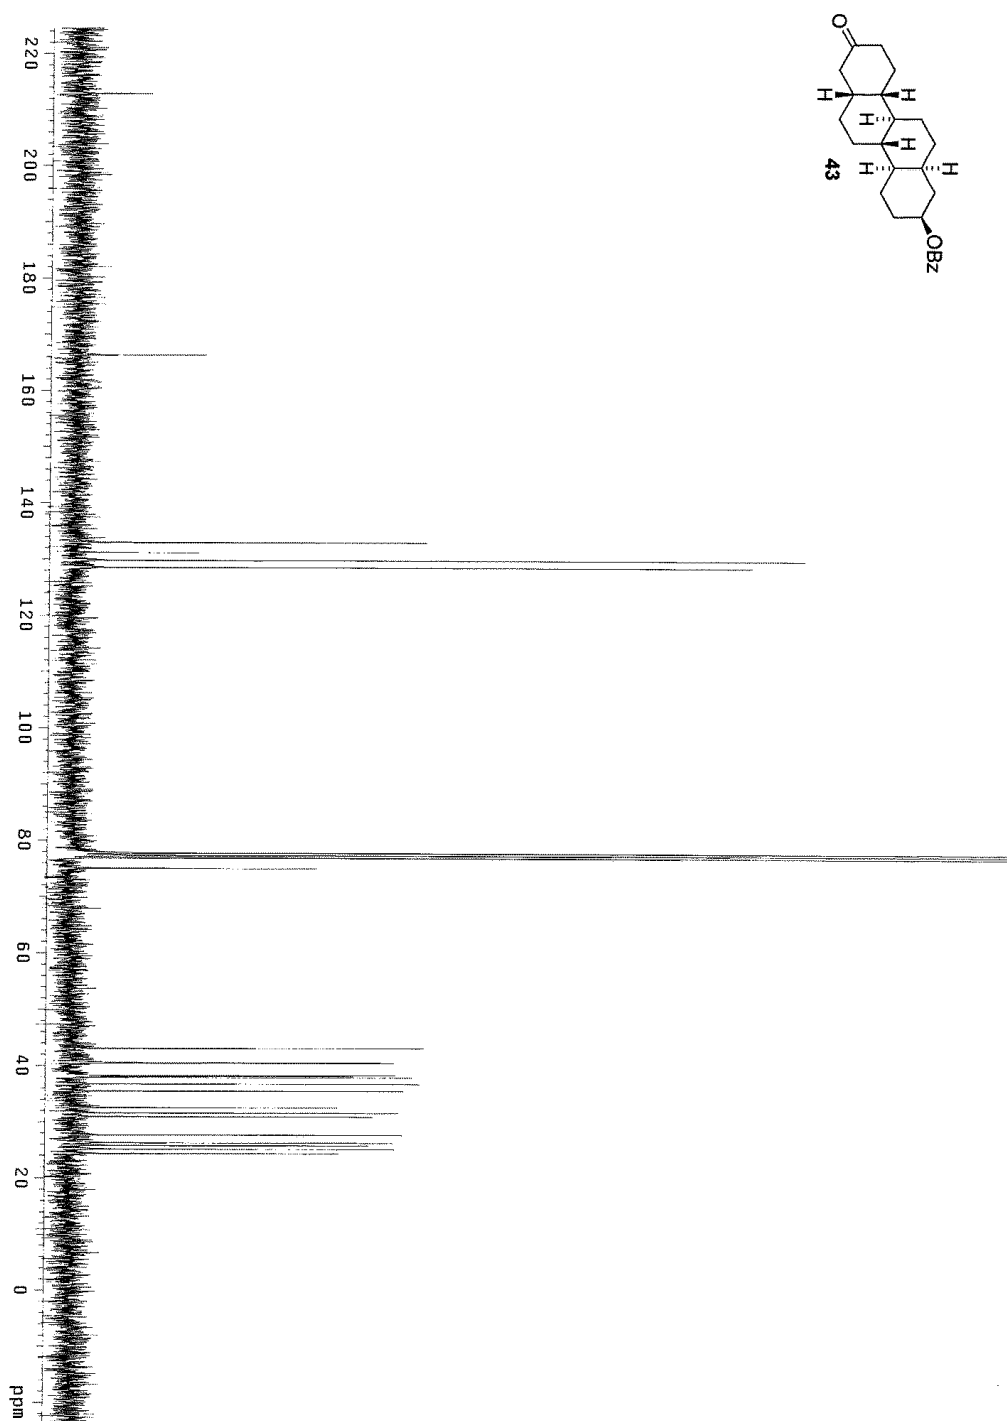

Supplement: c1ob05385j.pdf [file c1ob05385j.pdf]
